1  
2  
3  
4  
5  
6  
7  
8  
9  
10  
11  
12  
13  
14  
15  
16  
17  
18  
19  
20  
21  
22  
23  
24  
25  
26  
27

Inert and seed-competent tau monomers elucidate the structural origins of aggregation

Hilda Mirbaha<sup>1</sup>, Olga A. Morozova<sup>2</sup>, Kiersten M. Ruff<sup>3</sup>, Apurwa Sharma<sup>1</sup>, Rohit V. Pappu<sup>3</sup>,  
David W. Colby<sup>2</sup>, Hamid Mirzaei<sup>4</sup>, Lukasz A. Joachimiak<sup>1</sup>, Marc I. Diamond<sup>1</sup>

<sup>1</sup>Center for Alzheimer's and Neurodegenerative Diseases, University of Texas, Southwestern  
Medical Center, Dallas, Texas 75390

<sup>2</sup>Department of Chemical and Biomolecular Engineering, University of Delaware, Newark,  
Delaware 19716

<sup>3</sup>Department of Biomedical Engineering, Washington University in St. Louis, St. Louis,  
Missouri 63130

<sup>4</sup>Department of Biochemistry, University of Texas, Southwestern Medical Center, Dallas,  
Texas 75390

Corresponding Author  
Marc I. Diamond, M.D.  
NL10.120  
5323 Harry Hines Blvd.  
Dallas, TX 75390

Email: [marc.diamond@utsouthwestern.edu](mailto:marc.diamond@utsouthwestern.edu)  
Phone: 214-648-8857

28 **Abstract**

29

30 Tauopathies are defined by progressive accumulation of tau amyloids. These assemble  
31 around a protein seed, whose structure is unknown, but might explain the initiation of  
32 pathology. We have purified and characterized distinct forms of tau monomer—either seed-  
33 competent or inert. Recombinant tau that was seed-competent triggered intracellular tau  
34 aggregation, induced full length tau fibrillization *in vitro*, and exhibited intrinsic properties of  
35 self-assembly. Tau monomer from AD brain, but not from controls, similarly seeded  
36 aggregation, and self-assembled *in vitro* to form higher order, seed-competent structures. We  
37 used crosslinking with mass spectrometry to identify distinct conformers of both recombinant  
38 tau and human brain-derived protein. Theoretical models informed by this data suggest that  
39 VQIINK and VQIVYK sequences, which support amyloid formation, are uniquely exposed in  
40 all seed-competent structures. Our data imply that initiation of pathological aggregation  
41 begins with conversion of tau monomer from an inert to a seed-competent form.

42

## 43 Introduction

44

45 Amyloids are ordered protein assemblies, typically rich in beta sheet, that underlie multiple  
46 disorders including Alzheimer's disease (AD). Amyloid-forming proteins include tau,  
47 synuclein, and expanded polyglutamine proteins such as huntingtin, among many others. It is  
48 unknown how or why intracellular amyloid proteins such as tau transition from a relatively  
49 inert form to one that efficiently self-assembles into ordered structures. This process begins  
50 with the formation of a pathogenic "seed," a structure that serves as a template for homotypic  
51 fibril growth. This structural transition could be the critical event in the pathogenesis of  
52 neurodegeneration. Under defined conditions and relatively high concentrations (typically  
53 micromolar), recombinant tau monomer will form amyloid fibrils *in vitro*. However free  
54 monomer in cells is likely at a much lower concentration, and a complex intracellular protein  
55 milieu, with competing heterotypic interactions, theoretically should inhibit spontaneous self-  
56 assembly. The conversion of a protein from a monomer to a large, ordered multimer may  
57 occur by multiple mechanisms, but a proximal step involves the formation of a seed. This  
58 event, and indeed the actual form of the protein that constitutes the "minimal" seed, has  
59 remained obscure. This has led to the idea that a seed is potentially transitory, arising from  
60 equilibrium between two states: one relatively aggregation-resistant, and another that is  
61 short-lived. A seed could be a single molecule, or an assembly of molecules. Based on  
62 extrapolation from kinetic aggregation studies, it has been suggested that a critical seed for  
63 tau and polyglutamine peptide amyloid formation is a single molecule(1,2), while another  
64 study has proposed a tau multimer(3). Isolation of the seed-competent form of tau thus could  
65 be critical to understanding the initiation of disease.

66

67 Tau protein forms amyloids that underlie neurodegeneration in a variety of neuropathological  
68 syndromes, collectively termed tauopathies(4). These include AD and frontotemporal  
69 dementias, among many others. Multiple groups, including ours, have now observed that tau  
70 will propagate an aggregated state from the outside to the inside of a cell, between cells,  
71 across synapses, and within brain networks(5). In prior work we used size exclusion  
72 chromatography (SEC) to define tau trimers as the minimal unit of spontaneous cellular  
73 uptake and intracellular amyloid formation, and proposed this as the smallest particle capable  
74 of propagating aggregates between cells(6). This work involved application of "naked" protein  
75 assemblies derived from recombinant protein or human brain onto cultured "biosensor"  
76 HEK293 cells or primary neurons that express a tau aggregation reporter(7,8). These  
77 biosensor cells take up tau aggregates via macropinocytosis(9). The aggregates  
78 subsequently serve as highly specific templates to trigger intracellular amyloid  
79 formation(8,10). We have also determined that preincubation of cationic lipids such as  
80 Lipofectamine with tau seeds will directly transduce them into the cell, bypassing the  
81 physiologic uptake mechanism(8,11). Lipofectamine-mediated delivery into biosensor cells  
82 allows direct quantitation of seed titer for both tau and  $\alpha$ -synuclein(9).

83

84 Tau is intrinsically disordered upon isolation from bacteria or mammalian cells, and is  
85 relatively inert in terms of spontaneous self-assembly. However under various conditions,  
86 including exposure to polyanions such as heparin, tau will form aggregates via nucleated self-  
87 assembly (12,13). It is unknown how these experimental conditions relate to the initiation of  
88 aggregation in human brain. We have now purified various stable forms of full-length tau  
89 monomer from recombinant protein and human brain. One type is relatively inert, and is  
90 stable for long periods. Another type is "seed-competent," triggers amyloid formation in cells

91 and *in vitro*, and exhibits intrinsic properties of self-assembly. We have used crosslinking with  
92 mass spectrometry (XL-MS) to probe the structures of these molecules and build theoretical  
93 structural models. These models imply that differential exposure of hexapeptide motifs  
94 previously known to be important for amyloid formation distinguish the two forms of tau.  
95 Identification of distinct and stable forms of tau monomer, including structural isoforms that  
96 are uniquely seed-competent, bears directly on how we understand the initiation of protein  
97 aggregation in the tauopathies.

98

99

## 100 MATERIALS AND METHODS

101

### 102 **Tau expression, purification, fibrillization, and labeling**

103 We utilized several forms of recombinant tau. Full-length (FL), wild-type (WT) tau contains  
104 two cysteines that create disulfide bridges, and complicate isolation of monomer. Thus in  
105 addition to preparing FL WT tau (2N4R), we created FL tau (2N4R) that contains two  
106 cysteine/alanine substitutions (C291A, C322A), termed tau (2A), and prepared recombinant  
107 protein as previously described(14). Additionally, for fluorescence correlation spectroscopy  
108 (FCS), we engineered a single cysteine at the amino terminus of this construct (Cys-Tau  
109 (2A)) for labeling via sulfhydryl chemistry. These modified proteins have fibrillization and  
110 seeding properties similar to FL WT tau. To initiate fibrillization, we incubated tau in 10 mM  
111 HEPES, 100 mM NaCl, and 8  $\mu$ M heparin (1:1 ratio of FL tau to heparin) at 37°C for 72 h  
112 without agitation. For cysteine labeling, we incubated 200  $\mu$ L of 8  $\mu$ M fibrils (monomer  
113 equivalent) and monomer with 0.025 mg of Alexa Fluor-488 (AF488) C5-maleimide  
114 (Invitrogen) and 80 $\mu$ M Tetramethylrhodamine-5-maleimide (Sigma-Aldrich) overnight at 4°C  
115 with gentle rotation. We quenched excess dye with 10mM DTT for 1h at room temperature.  
116 We employ the following terminology to refer to four types of recombinant tau monomer, each  
117 comprised of identical primary amino acid (aa) sequences:

118

119 **M<sub>r</sub>**: recombinant tau prepared from E. coli, without any further modification or  
120 size fractionation.

121

122 **M<sub>h</sub>**: recombinant tau treated with heparin for 1min.

123

124 **M<sub>i</sub>**: recombinant tau, subsequently isolated by SEC.

125

126 **M<sub>s</sub>**: recombinant tau, treated with heparin, allowed to form fibrils, then sonicated,  
127 and isolated by SEC.

128

### 129 **Sonication and size exclusion chromatography (SEC)**

130 We sonicated labeled and non-labeled fibrils using a Q700 Sonicator (QSonica) at a power of  
131 100-110 watt (Amplitude 50) at 4°C for 3h. Samples were then centrifuged at 10,000 x g for  
132 10 min and 1 mL of supernatant was loaded into a Superdex 200 Increase 10/300 GL column  
133 (GE Healthcare) and eluted in PBS buffer at 4°C. After measuring the protein content of each  
134 fraction with a Micro BCA assay (Thermo Scientific) and/or fluorescence using a plate reader  
135 (Tecan M1000), we aliquoted and stored samples at -80°C until further use. Each aliquot was  
136 thawed immediately before use. The molecular weight of proteins in each fraction was  
137 estimated by running gel filtration standards (Bio-Rad): Thyroglobulin (bovine) 670 kDa;  $\gamma$ -  
138 globulin (bovine) 158 kDa; Ovalbumin (chicken) 44 kDa; myoglobin (horse) 17 kDa; and  
139 vitamin B<sub>12</sub> 1.35 kDa.

140  
141  
142  
143  
144  
145  
146  
147  
148  
149  
150  
151  
152  
153  
154  
155  
156  
157  
158  
159  
160  
161  
162  
163  
164  
165  
166  
167  
168  
169  
170  
171  
172  
173  
174  
175  
176  
177  
178  
179  
180  
181  
182  
183  
184  
185  
186  
187  
188

## **CD spectroscopy**

Circular dichroism (CD) measurements were performed at 25°C on a Jasco J-815 spectropolarimeter using a 0.1 cm optical path length. 200µL of 2 µM M<sub>s</sub> or M<sub>i</sub> monomer was dialyzed onto 10 mM NaP and the spectra were measured at 0.10 nm intervals, with a band width of 1.0 nm, and scan speed of 10 nm/min. The spectrum represents the average of 4 scans in the range of 195 to 250 nm.

## **Enzyme linked immunosorbent assay**

A total tau “sandwich” ELISA was performed similarly to that described previously(15). Antibodies were kindly provided by Dr. Peter Davies (Albert Einstein College of Medicine). 96-well round-bottom plates (Corning) were coated for 48 hours at 4°C with DA-31 (aa 150-190) diluted in sodium bicarbonate buffer (6 µg/mL). Plates were rinsed with PBS 3 times, blocked for 2 hours at room temperature with Starting Block (Pierce), and rinsed with PBS 5 additional times. SEC fractions were diluted in SuperBlock solution (Pierce; 20% SuperBlock, diluted in TBS), and 50 µL sample was added per well. DA-9 (aa 102-150) was conjugated to HRP using the Lighting-Link HRP Conjugation Kit (Innova Biosciences), diluted 1:50 in SuperBlock solution, and 50µL was added per well (15µg/mL). Sample + detection antibody complexes were incubated overnight at 4°C. Plates were washed with PBS 9 times with a 15 sec incubation between each wash, and 75 µL 1-Step Ultra TMB Substrate Solution (Pierce) was added. Plates were developed for 30min, and the reaction quenched with 2M sulfuric acid. Absorbance was measured at 450nm using an Epoch plate reader (BioTek). Each plate contained a standard curve, and all samples were run in triplicate.

## **Fluorescence correlation spectroscopy**

FCS measurements were conducted on a Confocal/Multiphoton Zeiss LSM780 Inverted microscope (Carl Zeiss-Evotec, Jena, Germany), using a 40X water immersion objective as previously described (16). Fluorescently labeled tau from SEC fractions (in PBS) was excited at 488nm and 561nm for 30sec, recording 10 times(17). The data analysis was performed with Origin 7.0 (OriginLab, Northampton, MA).

## **Liposome-mediated transduction of tau seeds**

Stable cell lines were plated at a density of 35,000 cells per well in a 96-well plate. After 18h, at 60% confluency, cells were transduced with protein seeds. Transduction complexes were made by combining [8.75 µL Opti-MEM (Gibco) +1.25 µL Lipofectamine 2000 (Invitrogen)] with [Opti-MEM + proteopathic seeds] for a total volume of 20µL per well. Liposome preparations were incubated at room temperature for 20min before adding to cells. Cells were incubated with transduction complexes for 24h.

## **FRET flow cytometry**

Cells were harvested with 0.05% trypsin and fixed in 2% paraformaldehyde (Electron Microscopy Services) for 10min, then resuspended in flow cytometry buffer. The MACSQuant VYB (Miltenyi) was used to perform FRET flow cytometry. To measure CFP and FRET, cells were excited with a 405nm laser, and fluorescence was captured with 405/50nm and 525/50nm filters, respectively. To measure YFP, cells were excited with a 488nm laser and fluorescence was captured with a 525/50nm filter. To quantify FRET, we used a gating strategy similar to that previously described(8). The integrated FRET density (IFD), defined as the percentage of FRET-positive cells multiplied by the median fluorescence intensity of FRET-positive cells, was used for all analyses. For each experiment, ~20,000 cells were



189 analyzed in triplicate. Analysis was performed using FlowJo v10 software (Treestar).

190

### 191 **Tau seeding *in vitro***

192 Recombinant full length (0N4R) tau monomer was purified as previously described(18) at  
193 1mg/mL in BRB80 buffer (80mM PIPES, 1mM MgCl<sub>2</sub>, 1mM EGTA, pH 6.8 with 0.3M NaCl)  
194 and boiled at 100°C for 5min with 25mM β-mercaptoethanol. The tau protein solution was  
195 then rapidly diluted 1:5 and cooled to 20°C in PBS, pH 7.4, to a final concentration of  
196 0.2mg/mL of tau and 5mM β-mercaptoethanol. This solution was supplemented with  
197 Thioflavin T (ThT) to a final concentration of 20μM and filtered through a sterile 0.2μm filter.  
198 Reaction sizes of 195μL were aliquoted from the prepared protein stock and thoroughly  
199 mixed with 5μL of each sample at 100nM monomer equivalent, or 5μL of buffer control. For  
200 each sample, three different technical replicates were prepared. An opaque 96-well plate was  
201 prepared with a 3mm glass bead added to each well to increase agitation. The recombinant  
202 tau solution was added to the plate in 200μL reaction volumes. The plate was sealed with  
203 sealing tape to prevent evaporation and incubated in the plate reader (SpectraMax M2) at  
204 37°C. ThT fluorescence was monitored over time with excitation and emission filters set to  
205 444nm and 485nm, respectively. Fluorescence readings were taken every 5min, with  
206 agitation for 5sec before each reading.

207

### 208 **Tau extraction from brain and characterization by SEC**

209 0.5g frontal lobe sections from AD patients and age-matched controls lacking evident tau  
210 pathology were gently homogenized at 4°C in 5mL of TBS buffer containing protease inhibitor  
211 cocktails (Roche) using a dounce homogenizer. Samples were centrifuged at 21,000 x g for  
212 15 min at 4°C to remove cellular debris. Supernatant was partitioned into aliquots, snap  
213 frozen and stored at -80°C. Immunopurification was performed with HJ8.5 at a ratio of 1:50  
214 (1μg mAb per 50μg of total protein), incubating overnight at 4°C while rotating. To each 1mL  
215 of mAb/brain homogenate we added 200μL of a 50% slurry protein G-agarose beads (Santa-  
216 Cruz). We washed the bead with TBS buffer before overnight incubation at 4°C. We then  
217 centrifuged the complexes at 1000 x g for 3min and discarded the supernatant. Beads were  
218 washed with Ag/Ab Binding Buffer, pH 8.0 (Thermo Scientific) three times. Tau bound to the  
219 beads was eluted in 100 μL low pH elution buffer (Thermo Scientific), incubated at room  
220 temperature for 7min, followed by neutralization with 10μL Tris-base pH 8.5. This elution step  
221 was repeated once more with 50 μL elution buffer and 5μL Tris-base pH 8.5 for a total of  
222 165μL. Samples were then centrifuged at 10,000 x g for 10min, and the supernatant loaded  
223 onto a Superdex 200 Increase 10/300 GL column (GE Healthcare). SEC fractions were  
224 frozen at -80°C after evaluation of protein content by Micro BCA assay (Thermo Scientific).

225

226 To compare different extraction methods, fresh frozen frontal lobe section from an AD patient  
227 was suspended in TBS buffer containing protease inhibitor cocktails (Roche) at 10% w/vol in  
228 4 portions. Samples were homogenized using 3 different devices: a dounce homogenizer,  
229 probe sonicator (Omni International), and tissue homogenizer (Power Gen 125, Fischer  
230 Scientific). We also included one more condition of homogenizing with tissue homogenizer  
231 followed by probe sonication for 10min. Samples were centrifuged at 21,000 x g for 15min at  
232 4°C to remove cellular debris. Supernatant was partitioned into aliquots followed by  
233 immunopurification.

234

### 235 **Analysis of heat denaturation data**

236 We analyzed the IFD from measurements of temperature dependent seeding using global fits  
237 to a proposed unimolecular heat denaturation reaction. This analysis rests on the Arrhenius  
238 equation(19):

$$k_U = Ae^{-\frac{E}{RT}}$$

239 where  $k_U$  is the unfolding rate constant,  $E$  is the activation energy,  $R$  is the gas constant,  $T$  is  
240 the temperature, and  $A$  is the pre-exponential factor. For the unimodal model, the data were  
241 fit globally to:

$$\text{IFD}(t) = 100e^{-t/\tau}.$$

242  
243 Here,  $t$  is the heat denaturation time and  $\tau = 1/k_U$  is the unfolding time. A second, multimodal  
244 model was deployed to account for discrepancies in the early time points which appeared to  
245 suggest the presence of a lag phase in denaturation. In this model, the data were fit globally  
246 to  
247

$$\begin{aligned} \text{IFD}(t) &= 100; & t \leq l_t \\ \text{IFD}(t) &= 100e^{-(t-l_t)/\tau}; & t > l_t \end{aligned}$$

248  
249 where  $l_t$  is the lag time given by

$$1/l_t = Be^{-\frac{E}{RT}}$$

250  
251 and  $B$  is a pre-exponential factor. We used the Akaike information criterion (AIC) to evaluate  
252 the best model as it quantifies the trade-off between goodness of fit and the complexity of the  
253 model (20). For least squares model fitting, AIC can be reduced to:

254

$$\text{AIC} = 2p + n\ln(\text{RSS}/n)$$

255  
256 where  $p$  is the number of parameters in the model,  $n$  is the number of observations, and RSS  
257 is the residual sum of squares. The preferred model is the one with the minimum AIC. Here,  
258 we find AIC = 123 for the unimodal model and AIC = 105 for the multimodal model, which  
259 suggests the multimodal model is a better description of the denaturation data.

260

261

## 262 **Crosslinking, sample processing and LC-MS/MS analysis**

263  $M_i$  and  $M_s$  tau samples were prepared as described above. In all cases, tau preparations  
264 were crosslinked at a total protein concentration of ~0.1mg/mL using 10 – 20 $\mu$ g starting  
265 material. The crosslinking buffer was 50 mM HEPES-KOH (pH 7.4) containing 300mM NaCl  
266 and 1mM DTT. The crosslinking reaction was initiated by adding disuccinimidyl suberate  
267 (DSS) stock solution (25 mM DSS-d<sub>0</sub> and -d<sub>12</sub>, Creative Molecules) in DMF to a final  
268 concentration of 1 mM. Samples were incubated at 37°C for 1min. For the  $M_h$  sample,  
269 heparin sulfate (Sigma) was added to a final concentration of 5 $\mu$ M, followed by 1mM DSS  
270 and the samples were incubated for 1min at 37°C. Excess reagent was quenched by  
271 addition of ammonium hydrogen carbonate to 50mM and incubation at 37°C for 30min, and  
272 then flash frozen at -80°C. After the quenching step, samples were evaporated to dryness in  
273 a vacuum centrifuge and resuspended in 8M urea. Proteins were reduced with 2.5mM TCEP  
274 (37°C, 30 min) and alkylated with 5mM iodoacetamide (30min, room temperature, protected  
275 from light). The sample solutions were diluted to 1M urea with 50mM ammonium hydrogen  
276 carbonate and trypsin (Promega) was added at an enzyme-to-substrate ratio of 1:50.  
277 Proteolysis was carried out at 37°C overnight followed by acidification with formic acid to 2%

278 (v/v). Samples were then purified by solid-phase extraction using Sep-Pak tC18 cartridges  
279 (Waters) according to standard protocols. Samples were fractionated by size exclusion  
280 chromatography (SEC) on a Superdex Peptide column as described elsewhere (21). Two  
281 fractions collected from SEC were evaporated to dryness and reconstituted in  
282 water/acetonitrile/formic acid (95:5:0.1, v/v/v) to a final concentration of approximately 0.5  
283  $\mu\text{g}/\mu\text{l}$ . 2 $\mu\text{L}$  each were injected for duplicate LC-MS/MS analyses on an Eksigent 1D-NanoLC-  
284 Ultra HPLC system coupled to a Thermo Orbitrap Fusion Tribrid system. Peptides were  
285 separated on self-packed New Objective PicoFrit columns (11cm x 0.075mm I.D.) containing  
286 Magic C<sub>18</sub> material (Michrom, 3 $\mu\text{m}$  particle size, 200 $\text{\AA}$  pore size) at a flow rate of 300nL/min  
287 using the following gradient. 0-5min = 5 %B, 5-95min = 5-35 %B, 95-97min = 35-95 %B and  
288 97-107min = 95 %B, where A = (water/acetonitrile/formic acid, 97:3:0.1) and B =  
289 (acetonitrile/water/formic acid, 97:3:0.1). The mass spectrometer was operated in data-  
290 dependent mode by selecting the five most abundant precursor ions (m/z 350-1600, charge  
291 state 3+ and above) from a preview scan and subjecting them to collision-induced  
292 dissociation (normalized collision energy = 35%, 30ms activation). Fragment ions were  
293 detected at low resolution in the linear ion trap. Dynamic exclusion was enabled (repeat count  
294 1, exclusion duration 30sec).

295

### 296 **Analysis of mass spectrometry data**

297 Thermo .raw files were converted into the open .mzXML format using msconvert  
298 (proteowizard.sourceforge.net) and analyzed using an in-house version of xQuest(22).  
299 Spectral pairs with a precursor mass difference of 12.075321 Da were extracted and  
300 searched against the respective FASTA databases containing Tau (TAU\_HUMAN P10636-8).  
301 xQuest settings were as follows: Maximum number of missed cleavages (excluding the  
302 crosslinking site) = 2, peptide length = 5-50 aa, fixed modifications = carbamidomethyl-Cys  
303 (mass shift = 57.021460 Da), mass shift of the light crosslinker = 138.068080 Da, mass shift  
304 of mono-links = 156.078644 and 155.096428 Da, MS<sup>1</sup> tolerance = 10 ppm, MS<sup>2</sup> tolerance =  
305 0.2 Da for common ions and 0.3 Da for crosslink ions, search in ion-tag mode. For brain  
306 derived samples we also included variable modifications including: Methionine oxidation =  
307 15.99491, Ser/Thr/Tyr Phosphorylation = 79.96633 and Lysine Ubiquitylation = 114.043 with  
308 nvariable\_mod = 1. Post-search manual validation and filtering was performed using the  
309 following criteria: xQuest score > 7, mass error between -4 and +7ppm, %TIC > 10, and a  
310 minimum peptide length of six aa. In addition, at least four assigned fragment ions (or at least  
311 three contiguous fragments) were required on each of the two peptides in a crosslink. False  
312 discovery rates for the identified crosslinks were estimated using xprophet(22). Crosslink data  
313 was visualized using Xvis(23).

314

### 315 **Generation of structural models using XL-MS-derived constraints**

316 High confidence crosslink pairs identified above were used to generate an ensemble of  
317 possible structures using a Rosetta protocol employing the crosslink pairs as structural  
318 restraints. The integration of XL-MS derived restraints have been previously used to refine  
319 structural models of large complexes(21) and simpler heterodimeric complexes(24). Based  
320 on distance distributions of crosslink pairs mapped onto crystallographic structures we set a  
321 lower bound of 15 $\text{\AA}$  and an upper bound of 25 $\text{\AA}$  for lysine C $\alpha$  pairs in our simulations.  
322 Importantly, in our simulations we weighted the constraint pairs as to allow some distances  
323 above the upper bound limit. The fragment library was supplanted by using chemical shifts  
324 derived from tau (bmr entry 17920) using csrosetta(25). We generated 1000 models for  
325 each of the four XL-MS datasets on a high performance cluster (biohpc.swmed.edu).



326 Because crosslinks were absent in the N- and C-termini we selected models that excluded  
327 additional contacts from residues 1-150 and 400-441. Low energy structures with radius of  
328 gyration<sub>FL/Frag</sub> ratios >2 and contact order<sub>FL/Frag</sub> ratios between 0.9 and 1.1 were further  
329 analyzed. Relative contact order (i.e. intramolecular crosslink distance) was computed using  
330 a perl script and is defined as the average sequence distance between all pairs of contacting  
331 residues normalized by the total sequence length. Contact maps were computed using a  
332 python script and all figures were generated using Pymol. All plots were generated using  
333 gnuplot.

334

### 335 **Commandline used for *ab initio* protocol calculations with XL-MS restraints**

336 AbinitioRelax.default.linuxgccrelease -in:file:fasta tau.fasta -file:frag3 tau.frag3.dat -file:frag9  
337 tau.frag9.dat -nstruct 1000 -abinitio::increase\_cycles 0.5 -abinitio::relax -score::weights  
338 score13\_env\_hb -abinitio::rg\_reweight 0.5 -abinitio::rsd\_wt\_helix 0.5 -abinitio::rsd\_wt\_loop  
339 0.5 -disable\_co\_filter true -out:file:silent csrosetta.out -constraints:cst\_fa\_file tau.cst -  
340 constraints:cst\_file tau.cst -constraints:cst\_weight 0.1 -constraints:cst\_fa\_weight 0.1 -  
341 loopfcst::coord\_cst\_weight 10.0

342

### 343 **Statistical analysis**

344 Group mean values were analyzed by one-way ANOVA with Bonferroni post hoc significant  
345 differences test using GraphPad prism 5 software. Data in text and figures are represented  
346 as mean ± SEM.

347

348

## 349 **RESULTS**

350

### 351 **Isolation of monomer from unfibrillized or fibrillized sources**

352 We initially sought to define the tau seeding unit that would trigger intracellular aggregation  
353 upon direct delivery to the cell interior. We had previously observed that a tau trimer is the  
354 minimal assembly size that triggers endocytosis and intracellular seeding(6). These  
355 experiments depended on spontaneous cell uptake, since no Lipofectamine was added to the  
356 reactions. A prior study had also indicated the role of disulfide linkages in promoting tau  
357 aggregation, potentially by dimer formation(3). Thus, for our initial studies we engineered and  
358 purified full-length (FL) tau monomer that lacks any internal cysteines due to alanine  
359 substitution (C299A and C322A), termed tau (2A). FL tau (2A) cannot self-associate based  
360 on disulfide linkages, which helped prevent the formation of cryptic dimers that could  
361 confound our studies. These substitutions do not affect tau purification, heparin-induced  
362 fibrillization, and sonication protocols, which we performed as described previously(6). We  
363 covalently labeled the fibril preps prior to sonication and isolation of recombinant FL tau (2A)  
364 assemblies of various sizes by size exclusion chromatography (SEC)(6). In parallel, we also  
365 studied FL wild type (WT) tau. We used methods identical to those described previously,  
366 which included controls of fluorescence correlation spectroscopy (FCS), and crosslinking to  
367 confirm purification of *bona fide* monomer(6). We purified unfibrillized recombinant FL tau  
368 (2A) monomer by SEC (Fig. 1A), and isolated SEC fractions of sonicated fibrils that contained  
369 putative monomer, dimer, trimer and ~10-mer (Fig. 1B).

370

### 371 **Fibril-derived monomer exhibits seeding activity in cells and *in vitro***

372 To test the seeding activity of the tau preparations, we used a previously described  
373 “biosensor” cell reporter line(8). These cells stably express 4R tau repeat domain (RD)

374 containing the disease-associated P301S mutation fused to cyan and yellow fluorescent  
375 proteins (tau-CFP/YFP). Exogenously applied seeds induce intracellular aggregation with  
376 resultant fluorescence resonance energy transfer (FRET) measured via flow cytometry(8,11).  
377 The degree of aggregation is scored using “integrated FRET density” (IFD), which is the  
378 product of the percent positive cells and the mean fluorescence intensity of FRET-positive  
379 cells, and from this we determine a titer of tau seeding activity(8). Lipofectamine directly  
380 transduces tau assemblies across the plasma membrane and increases the assay’s  
381 sensitivity by approximately 100-fold. Upon incubation with Lipofectamine, we readily  
382 observed seeding by larger assemblies, whether FL WT or 2A. Surprisingly, we also  
383 observed seeding activity in the monomer fractions (Fig. 1C). There was no difference  
384 between FL WT tau, and FL tau (2A) (Fig. 1C). We termed the inert monomer “M<sub>i</sub>,” and the  
385 seed-competent monomer “M<sub>s</sub>.” We confirmed our observations using epifluorescence  
386 microscopy, which revealed induction of intracellular inclusions after exposure of cells to M<sub>s</sub>,  
387 but not M<sub>i</sub> (Fig. 1D). These surprising results inspired us to check whether heparin itself could  
388 lead to the formation of a seed-competent monomer. We exposed FL WT tau to heparin for  
389 varying amounts of time, before purifying different assembly sizes by SEC and testing for  
390 seeding activity. After 15min of heparin exposure, we detected low but significant amounts of  
391 seed-competent monomer, while larger assemblies were more rare (Fig. 1E). Recombinant  
392 monomer not treated with heparin had no seeding activity at any time point (Fig. 1E). At later  
393 time points (1h, 4h) monomer fractions as well as larger assemblies all had strong seeding  
394 activity (Fig. 1E). To rule out an artifact of the Lipofectamine transduction, we tested FL (2A)  
395 tau preparations in an *in vitro* seeding assay that induces fibril formation by full-length tau  
396 (0N4R) through iterative polymerization and agitation steps(18). M<sub>i</sub> had no intrinsic seeding  
397 activity. However M<sub>s</sub> induced amyloid formation, albeit more slowly than trimer or  
398 unfractionated fibrils (Fig. 1F). We concluded that the M<sub>s</sub> fraction contains seeding activity  
399 that enables intracellular aggregation of tau RD-CFP/YFP in cells, or full-length tau *in vitro*,  
400 and that heparin-exposed monomer also developed seeding activity prior to its formation of  
401 larger assemblies.

#### 402 403 **Comparison of M<sub>i</sub> and M<sub>s</sub> by CD and FCS**

404 We were intrigued to observe seeding activity in a monomer fraction, and thus attempted to  
405 detect multimers. To begin, we tested for obvious structural differences between M<sub>i</sub> and M<sub>s</sub>  
406 using CD spectroscopy, which revealed none (Fig. 2A). We confirmed the sizes of species  
407 isolated after sonication using FCS, which measures particle diffusion through a fixed volume  
408 (Fig. 2B). As we previously observed(6), we accurately estimated the sizes of small  
409 assemblies ( $\leq 10$ -mer), but not larger assemblies ( $> 10$ -mer) (Fig. 2B). Next, we used double-  
410 label FCS in an attempt to identify multimers within the M<sub>s</sub> fraction. We engineered a cysteine  
411 onto the amino terminus of FL tau (2A) to enable covalent modification (Cys-Tau (2A)). We  
412 then prepared Cys-tau (2A) fibrils, or monomer, and labeled them simultaneously with  
413 Alexa488 (green) and tetramethylrhodamine (TMR, red) via maleimide chemistry. We carried  
414 out sonication and purification by SEC as before, isolating assemblies of various sizes. We  
415 evaluated each for cross-correlation between red and green signal, which indicates the  
416 presence of at least two tau molecules in a particle. We analyzed  $> 300$  events for each  
417 assembly. When we evaluated M<sub>i</sub> and M<sub>s</sub>, 100% of events in each case showed a diffusion  
418 time consistent with a molecule of  $\sim 50$ kD, which corresponds to the tau monomer (Fig.  
419 2C,D). Furthermore we observed no cross-correlation between red and green signal,  
420 indicating that neither preparation had detectable multimeric assemblies (Fig. 2C,D,H). By  
421 contrast, when we evaluated larger species such as dimer, trimer, or  $\sim 10$ -mer, we observed  
422 longer diffusion times consistent with the predicted assembly sizes, and significant cross-

423 correlation values (Fig. 2E-H), consistent with the presence of multimers. In summary, we  
424 found no evidence of multimers in the  $M_s$  fraction using FCS.

425

### 426 **SEC preparation efficiently purifies $M_s$ monomer**

427 To test for contamination of the  $M_s$  preparation with larger seed-competent assemblies during  
428 SEC, we took three approaches. First, we determined what degree of contamination would  
429 be required to give a substantial signal. We titrated  $M_s$  to determine an  $EC_{50}$  of  $\sim 10$ nM (Fig.  
430 3A), and also titrated dimer and trimer into a solution of 100nM  $M_i$  (assuming that those  
431 species would most likely account for contamination, if there were any)(Fig. 3B). We  
432 observed similar seeding efficiencies from dimer and trimer, with an  $EC_{50}$  of  $\sim 10$ nM monomer  
433 equivalent (Fig. 3B). In our estimation, these data indicated that to account for signal  
434 observed in the seeding assay, contamination of an otherwise inert monomer with larger  
435 seed-competent assemblies would have to be substantial.

436

437 We next tested the ability of SEC to exclude larger seeds from the monomer fraction. We first  
438 isolated  $M_s$  and larger assemblies from a sonicated fibril preparation. Removing the fraction  
439 that contained  $M_s$  (B5), we then pooled the remaining fractions, and spiked them with  $M_i$ . We  
440 re-fractionated the material on SEC to isolate again the monomer in fraction B5 (Fig. 3C). As  
441 previously observed,  $M_s$  and other fibril-derived assemblies had seeding activity (Fig. 3D).  
442 However, in the second case, while we observed seeding activity in larger assemblies, the  
443 monomer (which we take to be  $M_i$ ) re-isolated from a pool of larger fibril-derived assemblies  
444 had no seeding activity (Fig. 3E). This confirmed that larger, seed-competent assemblies do  
445 not appreciably contaminate the monomer fraction during SEC.

446

447 Finally, we used heat-mediated dissociation of oligomeric assemblies to test for the possibility  
448 that  $M_s$  in fact represented a uniquely compact multimer that somehow purifies as a  
449 monomer. We collected  $M_s$  by SEC, and heated the sample to 95°C for 3h. We then re-  
450 isolated the sample via SEC. We carried out the same procedure with trimer and  $\sim 20$ -mer. In  
451 each case, we tested the resultant fractions for seeding activity. In the first instance, after  
452 heating we re-isolated  $M_s$  purely as monomer that retained its seeding activity (Fig. 3F). The  
453 trimer assembly (fraction B8) broke down to smaller assemblies, predominantly monomer,  
454 each of which retained seeding activity (Fig. 3G). The  $\sim 20$ -mer (fraction A5) was largely  
455 stable following heat treatment, and retained its seeding activity (Fig. 3H). Based on these  
456 experiments, we concluded that our purification protocols leave virtually no contamination of  
457  $M_s$  by larger assemblies, and that all detectable seeding activity of  $M_s$  in fact derives from  
458 monomer.

459

### 460 **Differential heat lability of tau assemblies**

461 In the preceding experiment  $M_s$  retained seeding activity even after 3h at 95°C, a condition  
462 sufficient to dissociate trimers. These experiments implied that  $M_s$  consists of a surprisingly  
463 stable seed-competent structure, largely resistant to heat denaturation. Consequently, we  
464 used more nuanced heat denaturation of seeding activity to probe the relative stabilities of  
465  $M_s$ , dimer, trimer, and larger assemblies of FL WT tau. We first isolated tau monomer, dimer,  
466 trimer,  $\sim 10$ -mer, and  $\sim 20$ -mer on SEC. We then incubated the various assemblies at a range  
467 of temperatures (65, 75, 85, 95°C) and times (0, 3, 12, 18, 24, 48, 72h) before measuring  
468 seeding activity. Lower temperatures only slightly reduced seeding activity, whereas  
469 exposure of  $M_s$ , dimer, and trimer to temperatures  $\geq 85^\circ\text{C}$  for 18-24h eliminated most of it  
470 (Fig. 4A-D). By contrast, the seeding activities of  $\sim 10$ -mer and  $\sim 20$ -mer were relatively heat-  
471 resistant (Fig. 4A-D). This is consistent with our prior observations that tau seeds derived

472 from cultured cells are resistant to boiling (10).  $M_s$ , dimer, and trimer lost seeding activity at  
473 roughly the same rate, while larger assemblies remained intact. To determine a putative  
474 energy barrier between  $M_s$  and an inert form, we evaluated the denaturation data for  $M_s$ ,  
475 comparing two models for the transition of  $M_s$  to an inert form (which we assumed to be an  
476 unfolding reaction): a unimodal unfolding model vs. a multimodal model that assumes  
477 intermediate seed-competent states. The unimodal model did not account for the data at  
478 early time points, which indicated a lag phase in denaturation, whereas the multimodal model  
479 performed better (Fig. 4E). The lag phase in denaturation implies an ensemble of seed-  
480 competent states that define  $M_s$ , each separated by smaller barriers. Using this multimodal  
481 model, we calculated the barrier to conversion of  $M_s$  to an inert form to be  $\sim 18$  kcal / mol.  
482

### 483 **$M_s$ has unique properties of self-assembly**

484 Aggregation of  $M_i$  *in vitro* is relatively slow, requires high protein concentration (micromolar),  
485 and polyanions such as heparin(12,13). Based on the seeding activity of  $M_s$  we predicted that  
486 it might more readily self-associate. We incubated FL WT tau  $M_i$  and  $M_s$  alone, or dimer or  
487 trimer at equimolar ratios, keeping total particle concentration constant at 500nM. We then  
488 monitored change in assembly size over 24h.  $M_i$ , dimer, and trimer showed no evidence of  
489 self-association in this timeframe (Fig. 5A,C,D). By contrast, when incubated alone,  $M_s$   
490 readily formed larger assemblies (Fig. 5B). When we incubated  $M_i$  with dimer or trimer, we  
491 saw no change in the assembly population over 24h (Fig. 5E,F). By contrast, when we mixed  
492  $M_s$  with dimer or trimer we observed a growth of larger assemblies with a concomitant  
493 reduction in dimer and trimer peaks (Fig. 5G,H). We conclude that  $M_i$ , dimer, and trimer do  
494 not form larger assemblies at an appreciable rate, while  $M_s$  self-assembles or adds on to  
495 larger assemblies.  
496

### 497 **AD brain contains seed-competent monomer**

498 Given our experiments with  $M_i$  and  $M_s$ , we wished to test whether similar structures exist *in*  
499 *vivo*, and thus isolated tau monomer from AD and control patient brains. We extracted brain  
500 samples using a dounce homogenizer gently to try to avoid liberating significant monomer  
501 from fibrils. We immunoprecipitated tau using an antibody that targets the amino-terminus,  
502 and resolved the eluates by SEC, followed by ELISA to determine tau levels (Fig. 6A,B).  
503 Whereas tau from control brain extract eluted in the monomer fraction (Fig. 6A), tau from AD  
504 brain distributed across multiple fractions, corresponding to monomer and larger assemblies  
505 (Fig. 6B). When we tested each fraction for seeding activity, we observed none in any control  
506 brain fraction, including monomer (Fig. 6C). However all AD fractions contained seeding  
507 activity, including monomer (Fig. 6C). A seed-competent tau monomer is thus present in AD  
508 brain, but not in control brain. To test for its self-association *in vitro*, we incubated control and  
509 AD monomer for up to 24h. We then resolved the assemblies via SEC and tested each  
510 fraction for seeding activity. At 0h, AD monomer exhibited seeding activity (Fig. 6D). Over  
511 time we observed a transition to larger seed-competent assemblies (Fig. 6E, F). Tau  
512 monomer derived from AD brain thus has an intrinsic capacity for self-association into seed-  
513 competent assemblies.  
514

### 515 **XL-MS reveals distinct, stable conformational states in recombinant tau monomer**

516 To probe the structures of various forms of recombinant tau monomer, we employed  
517 crosslinking with mass spectrometry (XL-MS). This method creates restraints for structural  
518 models of single proteins or protein complexes(21,26,27). We studied FL WT tau monomer  
519 from a variety of conditions: recombinant protein purified from *E. coli* ( $M_r$ ); the same protein  
520 exposed to heparin for 1min and purified by SEC ( $M_h$ ); recombinant monomer subsequently



521 purified by SEC ( $M_i$ ); and seed-competent monomer purified after sonication of fibrils ( $M_s$ ). In  
522 each case, we performed reactions at low protein concentrations and short crosslink times,  
523 avoiding inter-protein crosslinks. We reacted samples with DSS, digested them with trypsin,  
524 enriched crosslinked peptides with by SEC, and analyzed them by capillary liquid  
525 chromatography tandem mass spectrometry. We assigned the complex fragment ion spectra  
526 to the corresponding peptide sequences using xQuest (22). Denaturation of recombinant tau  
527 with 8M urea prior to crosslinking produced no intramolecular cross-links (data not shown),  
528 indicating that crosslinks observed under native conditions represent local structure.

529  
530 Given our observation that four forms of WT FL tau ( $M_r$ ,  $M_h$ ,  $M_i$ ,  $M_s$ ) had two distinct activities  
531 (inert vs. seed-competent), we compared their structures using XL-MS.  $M_r$  and  $M_h$ , despite  
532 different seeding activities, exhibited relatively similar intramolecular crosslink patterns.  
533 These were dominated by short-range crosslinks (Fig. 7A,B). In  $M_r$ , we identified 21 unique  
534 crosslinks evenly distributed within the repeat domain (RD: aa243-367, composed of four  
535 repeated ~30aa sequences, RD1-4), and the projection domain (PD: aa1-242), with an  
536 average sequence separation of 16.5 aa between modified lysines (Fig. 7A; S1A; Table S1).  
537 In  $M_h$ , 57 unique crosslinks had a similar average sequence separation of 16 aa between  
538 modified lysines (Fig. 7B; S1B; Table S1). We observed an increased abundance of short  
539 range crosslinks clustered into two main regions: PD (aa130-175), RD2 (aa270-290), and  
540 RD4 (aa350-400) (Fig. 7B, S7B and Table S1).  $M_i$  exhibited 7 crosslinks, and  $M_s$  exhibited 8  
541 (Fig. 7C,D; S1C,D; Table S1).  $M_i$  and  $M_s$  shared only two common crosslinks, K224-K347  
542 and K225-K347, and crosslinks differed within the RD and in regions just upstream and  
543 downstream (Fig. 7C,D). The average sequence separation for  $M_i$  was 113 aa, and for  $M_s$  it  
544 was 136 aa. We note differences between  $M_i$  (purified by SEC), and  $M_r$  (which was not). This  
545 may be due to residual cell components (e.g. RNA) bound to  $M_r$ . In summary, we observed  
546 mostly short-range crosslink patterns for  $M_r$  and  $M_h$  with different distributions in the RD.  
547 Importantly, the crosslink pattern of  $M_h$  was very different from that of  $M_s$ , indicating that  
548 heparin exposure alone does not account for the structure of  $M_s$ .

549  
550 To test patient-derived tau monomer, we immunopurified tau from brains of 3 AD brains and  
551 3 age-matched controls, using the established SEC protocol to purify seed-competent  
552 monomer followed by our XL-MS protocol. In control tau we observed 5-7 intramolecular  
553 crosslinks (Fig. 7E; Table S1) and in AD-derived tau we observed 10-13 intramolecular  
554 crosslinks (Fig. 7F; Table S1). Similar to recombinant  $M_s$ , in all AD tau monomer samples we  
555 observed a discrete set of crosslinks between aa150 and aa259-290 (Fig. 7E, red lines). To  
556 evaluate the variability in the preparation of the brain derived samples more precisely, we  
557 homogenized tissue from a single AD brain using different approaches ranging in severity:  
558 dounce homogenization, pulse sonication, mechanical homogenization, and mechanical  
559 homogenization with pulse sonication (Fig. S2A-D, Table S1). While there was variation in  
560 the total number of crosslinks (3, 11, 57, and 8, respectively) the core set of crosslinks  
561 between aa150 and 259-290 were present independent of homogenization method (Fig.  
562 S2A-D, red lines). The consistency of the crosslinks between aa150 and 259-290 focused our  
563 attention on the domains they implicated, especially the amyloid-forming sequences within  
564 the RD.

### 565 **Models of seed-competent monomers suggest exposure of VQIINK and VQIVYK**

566 To understand how core elements of tau might play a role in its aggregation, we employed  
567 ROSETTA to create models of tau structure for  $M_r$ ,  $M_h$ ,  $M_i$  and  $M_s$ , using restraints from the  
568 crosslink patterns, and length of the DSS crosslinker (Fig. 8A-D, Table S1, Supp. Movies:  $M_r$ ,  
569



570  $M_h$ ,  $M_i$ ,  $M_s$ ). We prioritized low energy structures that excluded additional contacts with the N-  
571 and C-termini, as suggested by the crosslink patterns (see methods for details). We next  
572 calculated protein contact maps for representative  $M_r$  and  $M_i$  (inert), and  $M_h$ , and  $M_s$  (seed  
573 competent) structures (Fig. S3A-D), which highlight how the XL-MS derived restraints drive  
574 the topology of each tau structure (Fig. S3E-H, green dots). The  $M_r$  structural model was  
575 based on short range contacts clustered throughout the entire RD (Fig. 8A), and this  
576 predicted masking of VQIINK and VQIVYK sequences, which have previously been proposed  
577 as critical for tau amyloid formation(28,29). The model of  $M_i$  structure was based on a  
578 dramatically different crosslink pattern, with the RD1/2 (Fig. 8C, red-green interface) and  
579 RD2/3 (Fig. 8C, green-blue interface) regions in discretely formed hairpins similar to the  
580 conformation of tau bound to microtubules indicated by NMR (30). In this model, the core  
581 elements of VQIINK (green spheres) at the beginning of the RD2, and VQIVYK (blue  
582 spheres) at the beginning of the RD3(29) are buried in hairpins (Fig. 8C, S3C). Remarkably,  
583 despite different crosslink patterns, our models suggested that both  $M_r$  and  $M_i$  feature  
584 VQIINK/VQIVYK sequences relatively obscured from solvent accessibility. Crosslink studies  
585 of tau monomer from control patients also suggested a structural model in which these core  
586 residues are less accessible (Fig. 8E, Table S1; Supp. Movie: Control 1), although we place  
587 important caveats on these interpretations. Our ability to resolve high confidence structural  
588 models using XL-MS in patient-derived samples is more limited due to fewer high confidence  
589 crosslinks, possibly from sample heterogeneity (multiple isoforms, and multiple tau  
590 structures).

591  
592 For seed-competent forms of tau, and despite distinct crosslink patterns, we also observed  
593 common predicted effects on VQIINK/VQIVYK exposure. The  $M_h$  structural model was  
594 predominantly influenced by short-range crosslinks, consistent with local contacts within the  
595 PD and the RD2 that result in burial of the VQIINK sequence but exposure of the VQIVYK  
596 sequence (Fig. 8B; Supp. Movie:  $M_h$ ). This is consistent with recent observations that heparin  
597 binds directly to residues 270-290 which include VQIINK (33). By contrast the model of  $M_s$   
598 was influenced by more long-range crosslinks, which nonetheless predicted an exposed  
599 conformation of VQIINK/VQIVYK (Fig. 8D; Supp. Movie:  $M_s$ ). Lastly, in AD brain-derived tau  
600 we also observed crosslinks between aa ~150 to aa259-290, which we think help define an  
601 exposed configuration of VQIINK/VQIVYK in a seed-competent monomer (Fig. 8F, Table S1;  
602 Supp. Movie: AD1). In summary, despite profound differences in overall crosslink patterns,  
603 the models suggested by XL-MS highlight relative exposure of VQIINK/VQIVYK in forms of  
604 tau with intrinsic seeding activity ( $M_h$ ,  $M_s$ ), while forms of tau that are inert ( $M_r$ ,  $M_i$ ) feature  
605 VQIINK/VQIVYK buried in hairpins. These models will obviously require additional tests using  
606 advanced biophysical methods, but provide a plausible explanation for the distinct activities of  
607 tau monomer that we have observed.

## 608 609 610 **Discussion**

611  
612 The simplest interpretation of our data is that consistent with it being an intrinsically  
613 disordered protein, tau monomer can occupy several unique and stable conformational  
614 states. One set of structures is relatively inert, while another has intrinsic ability to self-  
615 assemble, and acts as a template, or seed, for fibril growth *in vitro* and in cells. We confirmed  
616 with multiple controls that  $M_s$ , derived from sonicated fibrils, was in fact a monomer and not a  
617 larger assembly, and that there was no detectable cross-contamination of larger species into  
618 the putative monomer fraction upon SEC. Heat denaturation of seeding activity was

619 consistent with a complex folding state for  $M_s$ , comprised of several seed-competent  
620 intermediates. Tau monomer purified from AD brain also had intrinsic seeding activity, and  
621 self-associated to produce seed-competent assemblies. Finally, we used XL-MS to compare  
622 conformations of different tau monomers. A model restrained by our XL-MS data suggested  
623 that VQIVYK and VQIINK sequences might assume an open configuration in  $M_s$ ,  $M_h$ , and AD-  
624 derived monomer, all of which have intrinsic seeding activity. By contrast, the model  
625 suggested that  $M_i$  and  $M_r$ , and control brain monomer, all of which are inert, lack  
626 VQIINK/VQIVYK exposure. Taken together, these data establish a new concept for tau: this  
627 intrinsically disordered protein has multiple, stable monomeric states, functionally  
628 distinguished by the presence or absence of seeding activity.

629  
630 Amyloid proteins form progressively larger assemblies over time, and it has been difficult to  
631 define the composition of the minimal seed. Mandelkow and colleagues studied tau  
632 aggregation *in vitro* and concluded that a seed of 8-12 molecules existed in their  
633 experimental system(3). By contrast, Kuret and colleagues posited an “intermediate” of tau  
634 that could subsequently initiate self-assembly, and their data, based on extrapolation of tau  
635 concentrations needed to enable development of thioflavin fluorescence *in vitro*, were  
636 consistent with a monomeric seed(1). Wetzel and colleagues also proposed that a monomer  
637 is the basis of a “thermodynamic nucleus” that templates the aggregation of synthetic  
638 polyglutamine peptides(31). However, no prior study has previously identified stable forms of  
639 tau that seed amyloid formation. This provides an opportunity to study the earliest events in  
640 aggregate formation.

641  
642 The actual cause of tau aggregation in tauopathies is unknown. It has been proposed that  
643 dissociation of tau monomer from microtubules, possibly due to phosphorylation, allows self-  
644 association to form pathogenic assemblies(32). In this study, using a single source of  
645 recombinant protein, we define distinctly structured seed-competent and inert forms of tau.  
646 We have similarly identified seed-competent species in patient-derived preparations. We fully  
647 recognize that in reality “seed-competent” and “inert” forms of tau represent multiple  
648 structural ensembles separated by defined energy or kinetic barriers. The barrier blocking  
649 conversion of an inert to a seed-competent form of tau can apparently be overcome by  
650 incubation with heparin and/or incorporation into a fibril. In neurons, other factors such as  
651 post-translational modifications and heterologous binding events likely play a role.  
652 Identification of the factors that trigger conversion from inert to seed-competent forms will  
653 thus have obvious implications for understanding disease mechanisms.

654  
655 Isolation of seed-competent monomer from AD brain, with a very mild purification that  
656 explicitly excludes sonication or vigorous tissue homogenization, strongly suggests that this  
657 form of monomer freely exists *in vivo*. Furthermore, we observed that both recombinant  $M_s$   
658 and AD -derived monomer build multimeric assemblies *in vitro* far more efficiently than  $M_i$  or  
659 control-derived monomer. Thus we hypothesize that a uniquely structured form of tau may be  
660 required for efficient assembly growth in cells. This contrasts with the idea that multimeric  
661 assemblies uniquely stabilize the conformation of otherwise unstructured proteins as they  
662 incorporate into the growing fibril. Taken together, we imagine that the initiation of  
663 aggregation in human brain might begin with conversion of tau monomer from an inert to a  
664 seed-competent form. To fully study this process will require more extensive biochemical  
665 purification of tau monomer from the earliest stages of disease.

666

667  $M_s$  has a remarkably stable structure, as it resists heat denaturation at 95°C for up to 3h. This  
668 suggests a heretofore unrecognized conformation of tau that, to account for its slow heat  
669 denaturation, likely involves multiple intra-molecular interactions involving short and long  
670 range amino acid contacts. XL-MS provides some indication of what these might be, and  
671 indicates a predominance of more long-range intramolecular interactions in  $M_s$  vs.  $M_i$ . In  
672 agreement with the XL-MS results, we observed that heat inactivation of  $M_s$  seeding activity  
673 occurs with a lag phase, rather than first order time-dependent decay. This implies a  
674 complex tertiary structure in which  $M_s$  has multiple seed-competent intermediates. Future XL-  
675 MS studies performed at different temperatures could reveal these structures. With more  
676 advanced methods to interrogate the structure of monomeric tau in patient material, we  
677 imagine that “seed-competent monomer” will in fact represent myriad structures, depending  
678 on the underlying disease. This could provide an explanation for how a single protein might  
679 self-assemble into diverse amyloid strains.

680  
681 Without further studies to identify structures of tau at higher resolution, we cannot know for  
682 certain why one form acts as a seed and the other does not. However, we gained important  
683 insights when we modeled tau structures using ROSETTA, using XL-MS results as restraints.  
684 Despite obvious caveats, our models predict that the local environment surrounding two  
685 hexapeptide motifs, VQIINK and VQIVYK, which are required for tau to form amyloid  
686 structures, may explain the differences between seed-competent and inert forms. In the  
687 models of  $M_i$  and  $M_r$ , and control brain-derived tau, these motifs lie buried in hairpin  
688 structures, whereas in  $M_s$  and AD-derived tau, both are exposed, and in  $M_h$  VQIVYK is  
689 exposed. VQIINK/VQIVYK thus might serve as substrates for intermolecular interaction in a  
690 growing assembly. Interestingly,  $M_s$  has a very different pattern of crosslinks compared to the  
691  $M_h$ , yet both seed aggregation. Indeed, it has been recently observed that heparin binding  
692 involves residues spanning 270-290, and promotes expansion of the remainder of the  
693 molecule (33), which is consistent with our predictions of relative exposure of  
694 VQIINK/VQIVYK. We hypothesize that conformers of tau monomer differentially present the  
695 core VQIINK/VQIVYK sequences. The diversity of exposed core elements (potentially beyond  
696 VQIINK/VQIVYK) could specify the formation of assemblies that give rise to distinct strains.  
697 Consistent with this idea, a recent structural study indicates that in AD-derived tau fibrils the  
698 VQIVYK sequence plays a key role in the core amyloid structure along with adjacent amino  
699 acids, but the VQIINK sequence does not (34). We also note that multiple disease-associated  
700 mutations in tau affect residues in close proximity to VQIINK/VQIVYK. For example, our  
701 models predict that serine or leucine substitutions at P301 (which cause dominantly inherited  
702 tauopathy) would destabilize the local structure, and promote exposure of the  
703 VQIINK/VQIVYK sequences. Future experiments will test these ideas more definitively.

## 704 705 **Conclusion**

706 Our findings indicate that tau monomer has at least two dominant structural configurations,  
707 one of which has intrinsic activity as a seed and a self-assembly factor. We cannot exclude  
708 other models of seed formation based on these studies, and they may also play a key role in  
709 amyloid formation. Thus even temporary, critical local elevations in the concentration of an  
710 aggregation-prone protein may enable clustering, with an as yet unspecified conformational  
711 transition to form a seed. This would be consistent with a “molten globule” as the origin of a  
712 seed, perhaps reflecting the multimeric tau assembly described originally by Mandelkow and  
713 colleagues (3). However, our observations in this case suggest an alternative possibility,  
714 whereby events triggered by aging, genetics, beta amyloid toxicity, brain trauma, or other

715 insults, enable tau monomer to transition to a stable conformation that mediates self-  
716 assembly and initiates tauopathy.

717

### 718 **Acknowledgements**

719 We thank Peter Davies for generously providing antibody reagents and ELISA protocol  
720 guidance. This work was supported by grants from the Tau Consortium and NIH grants  
721 awarded to 1R01NS071835 (M.I.D.), R01NS089932 (R.V.P. and M.I.D.), and the Effie Marie  
722 Cain Endowed Scholarship (L.A.J.). We appreciate the help of the Live Cell Imaging Core  
723 Facility administered by Katherine Luby-Phelps, Ph.D., and the **Proteomics** Core Facility at  
724 the University of Texas Southwestern Medical Center.

725

### 726 **Competing Interests**

727 A patent disclosure has been filed by H.M., L.A.J. and M.I.D. related to the use of unique  
728 crosslinks to create biomarkers for neurodegenerative diseases.

729

730 **References**

- 731 1. Chirita CN, Congdon EE, Yin H, Kuret J. Triggers of full-length tau aggregation: a role  
732 for partially folded intermediates. *Biochemistry*. 2005 Apr 19;44(15):5862–72.
- 733 2. Kar K, Jayaraman M, Sahoo B, Kodali R, Wetzel R. Critical nucleus size for disease-  
734 related polyglutamine aggregation is repeat-length dependent. *Nat. Struct. Mol. Biol.*  
735 2011 Mar;18(3):328–36. PMID: PMC3075957
- 736 3. Friedhoff P, Bergen von M, Mandelkow EM, Davies P, Mandelkow E. A nucleated  
737 assembly mechanism of Alzheimer paired helical filaments. *Proc. Natl. Acad. Sci.*  
738 U.S.A. National Academy of Sciences; 1998 Dec 22;95(26):15712–7. PMID:  
739 PMC28109
- 740 4. Neurodegenerative tauopathies. 2001;24(1):1121–59. Retrieved from:  
741 <http://www.annualreviews.org/doi/abs/10.1146/annurev.neuro.24.1.1121>
- 742 5. Sanders DW, Kaufman SK, Holmes BB, Diamond MI. Prions and Protein Assemblies  
743 that Convey Biological Information in Health and Disease. *Neuron*. Elsevier; 2016 Feb  
744 3;89(3):433–48. PMID: PMC4748384
- 745 6. Tau Trimers Are the Minimal Propagation Unit Spontaneously Internalized to Seed  
746 Intracellular Aggregation. 2015 Jun 12;290(24):14893–903. PMID: PMC4463437
- 747 7. Frost B, Jacks RL, Diamond MI. Propagation of tau misfolding from the outside to the  
748 inside of a cell. *J. Biol. Chem. American Society for Biochemistry and Molecular*  
749 *Biology*; 2009 May 8;284(19):12845–52. PMID: PMC2676015
- 750 8. Proteopathic tau seeding predicts tauopathy in vivo. 2014 Oct 14;111(41):E4376–85.  
751 PMID: PMC4205609
- 752 9. Holmes BB, Devos SL, Kfoury N, Li M, Jacks R, Yanamandra K, et al. Heparan sulfate  
753 proteoglycans mediate internalization and propagation of specific proteopathic seeds.  
754 *Proc. Natl. Acad. Sci. U.S.A. National Acad Sciences*; 2013 Aug 13;110(33):E3138–47.  
755 PMID: PMC3746848
- 756 10. Sanders DW, Kaufman SK, Devos SL, Sharma AM, Mirbaha H, Li A, et al. Distinct Tau  
757 Prion Strains Propagate in Cells and Mice and Define Different Tauopathies. *Neuron*.  
758 2014 May 21. PMID: PMC4171396
- 759 11. Furman JL, Holmes BB, Diamond MI. Sensitive Detection of Proteopathic Seeding  
760 Activity with FRET Flow Cytometry. *J Vis Exp*. 2015;(106):e53205–5. PMID:  
761 PMC4692784
- 762 12. Goedert M, Jakes R, Spillantini MG, Hasegawa M, Smith MJ, Crowther RA. Assembly  
763 of microtubule-associated protein tau into Alzheimer-like filaments induced by  
764 sulphated glycosaminoglycans. *Nature*. Nature Publishing Group; 1996 Oct  
765 10;383(6600):550–3.
- 766 13. Pérez M, Valpuesta JM, Medina M, Montejo de Garcini E, Avila J. Polymerization of tau  
767 into filaments in the presence of heparin: the minimal sequence required for tau-tau



- 768 interaction. *J. Neurochem.* 1996 Sep;67(3):1183–90.
- 769 14. Frost B, Ollesch J, Wille H, Diamond MI. Conformational diversity of wild-type Tau  
770 fibrils specified by templated conformation change. *J. Biol. Chem. American Society for*  
771 *Biochemistry and Molecular Biology*; 2009 Feb 6;284(6):3546–51. PMID:  
772 PMC2635036
- 773 15. Acker CM, Forest SK, Zinkowski R, Davies P, d'Abramo C. Sensitive quantitative  
774 assays for tau and phospho-tau in transgenic mouse models. *Neurobiol. Aging.* 2013  
775 Jan;34(1):338–50. PMID: PMC3474864
- 776 16. Measurement of microsecond dynamic motion in the intestinal fatty acid binding protein  
777 by using fluorescence correlation spectroscopy. 2002 Oct 29;99(22):14171–6.  
778 Retrieved from:  
779 [http://eutils.ncbi.nlm.nih.gov/entrez/eutils/elink.fcgi?dbfrom=pubmed&id=12381795&ret](http://eutils.ncbi.nlm.nih.gov/entrez/eutils/elink.fcgi?dbfrom=pubmed&id=12381795&retmode=ref&cmd=prlinks)  
780 [mode=ref&cmd=prlinks](http://eutils.ncbi.nlm.nih.gov/entrez/eutils/elink.fcgi?dbfrom=pubmed&id=12381795&retmode=ref&cmd=prlinks)
- 781 17. Spectroscopic Study and Evaluation of Red-Absorbing Fluorescent Dyes. 2003  
782 Jan;14(1):195–204. Retrieved from: <http://pubs.acs.org/doi/abs/10.1021/bc025600x>
- 783 18. Morozova OA, March ZM, Robinson AS, Colby DW. Conformational features of tau  
784 fibrils from Alzheimer's disease brain are faithfully propagated by unmodified  
785 recombinant protein. *Biochemistry. American Chemical Society*; 2013 Oct  
786 8;52(40):6960–7. PMID: PMC4142060
- 787 19. Laidler KJ. The development of the Arrhenius equation. *Journal of Chemical Education.*  
788 1984.
- 789 20. Burnham KP, Anderson DR. Model selection and multimodal inference: a practical  
790 information-theoretic approach. p. 61–3.
- 791 21. Leitner A, Joachimiak LA, Bracher A, Mönkemeyer L, Walzthoeni T, Chen B, et al. The  
792 Molecular Architecture of the Eukaryotic Chaperonin TRiC/CCT. *Structure.* 2012  
793 May;20(5):814–25.
- 794 22. Rinner O, Seebacher J, Walzthoeni T, Mueller LN, Beck M, Schmidt A, et al.  
795 Identification of cross-linked peptides from large sequence databases. *Nat. Methods.*  
796 Nature Publishing Group; 2008 Apr;5(4):315–8. PMID: PMC2719781
- 797 23. Grimm M, Zimniak T, Kahraman A. xVis: a web server for the schematic visualization  
798 and interpretation of crosslink-derived spatial restraints. *Nucleic acids ....* 2015.
- 799 24. Kahraman A, Herzog F, Leitner A, Rosenberger G, Aebersold R, Malmström L. Cross-  
800 link guided molecular modeling with ROSETTA. Fernandez-Fuentes N, editor. *PLoS*  
801 *ONE. Public Library of Science*; 2013;8(9):e73411. PMID: PMC3775805
- 802 25. Lange OF, Rossi P, Sgourakis NG. Determination of solution structures of proteins up  
803 to 40 kDa using CS-Rosetta with sparse NMR data from deuterated samples. 2012.
- 804 26. Lasker K, Förster F, Bohn S, Walzthoeni T, Villa E, Unverdorben P, et al. Molecular

- 805 architecture of the 26S proteasome holocomplex determined by an integrative  
806 approach. Proc. Natl. Acad. Sci. U.S.A. National Acad Sciences; 2012 Jan  
807 31;109(5):1380–7. PMID: PMC3277140
- 808 27. Joachimiak LA, Walzthoeni T, Liu CW, Aebersold R, Frydman J. The structural basis of  
809 substrate recognition by the eukaryotic chaperonin TRiC/CCT. Cell. 2014 Nov  
810 20;159(5):1042–55. PMID: PMC4298165
- 811 28. Bergen von M, Friedhoff P, Biernat J, Heberle J, Mandelkow EM, Mandelkow E.  
812 Assembly of tau protein into Alzheimer paired helical filaments depends on a local  
813 sequence motif ((306)VQIVYK(311)) forming beta structure. Proc. Natl. Acad. Sci.  
814 U.S.A. National Academy of Sciences; 2000 May 9;97(10):5129–34. PMID:  
815 PMC25793
- 816 29. Bergen von M, Barghorn S, Li L, Marx A, Biernat J, Mandelkow EM, et al. Mutations of  
817 tau protein in frontotemporal dementia promote aggregation of paired helical filaments  
818 by enhancing local beta-structure. J. Biol. Chem. 2001 Dec 21;276(51):48165–74.
- 819 30. Kadavath H, Jaremko M, Jaremko Ł, Biernat J, Mandelkow E, Zweckstetter M. Folding  
820 of the Tau Protein on Microtubules. Angew. Chem. Int. Ed. Engl. WILEY-VCH Verlag;  
821 2015 Aug 24;54(35):10347–51.
- 822 31. Bhattacharyya AM, Thakur AK, Wetzel R. polyglutamine aggregation nucleation:  
823 thermodynamics of a highly unfavorable protein folding reaction. Proc. Natl. Acad. Sci.  
824 U.S.A. 2005 Oct 25;102(43):15400–5. PMID: PMC1266079
- 825 32. Mandelkow E-M, Mandelkow E. Biochemistry and cell biology of tau protein in  
826 neurofibrillary degeneration. Cold Spring Harb Perspect Med. 2012 Jul;2(7):a006247–  
827 7. PMID: PMC3385935
- 828 33. Zhao J, Huvent I, Lippens G, Eliezer D, Zhang A, Li Q, et al. Glycan Determinants of  
829 Heparin-Tau Interaction. Biophys. J. 2017 Mar 14;112(5):921–32. PMID:  
830 PMC5355497
- 831 34. Fitzpatrick AWP, Falcon B, He S, Murzin AG, Murshudov G, Garringer HJ, et al. Cryo-  
832 EM structures of tau filaments from Alzheimer's disease. Nature. 2017 Jul 5;56:343.
- 833
- 834
- 835
- 836

837 FIGURE LEGENDS

838

839 **Figure 1: Isolation of recombinant tau assemblies and seeding activity of monomer**  
840 **derived from fibrils in cells and in vitro.** (A, B) FL Cys-Tau(2A) was labeled with Alexa488  
841 and resolved by SEC (A), or was fibrillized in the presence of heparin, labeled with Alexa488,  
842 sonicated, and the assemblies resolved by SEC (B). The column was calibrated using MW  
843 standards of the indicated sizes. Color codes indicate the putative assembly sizes. (C) Tau  
844 assemblies purified by SEC were evaluated by seeding onto tau RD-CFP/YFP biosensor  
845 cells.  $M_i$  represents “inert” monomer purified by SEC without fibrillization, which has no  
846 seeding activity;  $M_s$  represents “seed-competent” monomer purified after prior fibrillization  
847 and sonication. (D) FL WT tau and FL Cys-Tau(2A) were similarly fibrillized, sonicated, and  
848 the fragments resolved by SEC. Seeding activity of each fraction was evaluated by SEC.  $M_s$   
849 and larger assemblies of both forms of tau exhibit seeding activity, but not  $M_i$ . Fractions were  
850 evaluated by FCS. IFD = Integrated FRET Density. (E) Heparin treatment of FL WT tau was  
851 carried out for 15min, 1h, or 4h. Samples were resolved by SEC, and fractions of various  
852 sizes were compared using the biosensor seeding assay. “Pre-SEC” refers to the sample  
853 prior to fractionation. At 15min, a small, but significant seeding activity was observed in the  
854 monomer fraction. By 1h this was very strong, and was comparable to the signal from  
855 monomer derived from sonicated fibrils. NT = monomer not treated with heparin. (F) Full-  
856 length (0N4R) tau aggregation *in vitro* was measured using induced thioflavin fluorescence.  
857 Fibril-derived samples were purified by SEC.  $M_i$  had no seeding activity, whereas  $M_s$ , trimer,  
858 and unfractionated fibrils had strong seeding activity.

859

860 **Figure 2: Fluorescence correlation spectroscopy (FCS) analyses of  $M_i$  and  $M_s$ .**

861 (A) CD spectra of  $M_i$  and  $M_s$  were similar. (B) FCS Diffusion times for  $M_i$ ,  $M_s$ , dimer, trimer,  
862 and ~10mer, and the cross-correlation for  $M_i$ ,  $M_s$ , dimer, trimer, and  $\geq 10$ -mer were  
863 determined after labeling of fibrils with Alexa488, or double labeling with  
864 tetramethylrhodamine prior to sonication. Table reflects the predicted diffusion time based on  
865 a molecular weight, and the actual diffusion time. The variance between predicted vs.  
866 observed times is reported. (C-G) FCS for double-labeled tau assemblies. Cross correlation  
867 between the two dyes is indicated in grey lines. (H) Summary of FCS cross-correlation,  
868 including free dyes. Neither free dye,  $M_i$  nor  $M_s$  showed any cross-correlation, indicating  
869 single species predominate. All multimeric assemblies exhibited cross-correlation, indicating  
870 the presence of both dyes within a single particle.

871

872 **Figure 3: Seeding potency, SEC purification fidelity, and heat stability.** (A,B) Titration of  
873 assemblies was performed. (A)  $M_s$  exhibited an  $EC_{50}$  of approximately 10nM (monomer  
874 equivalent); (B) Dimer and trimer had similar potencies. Concentration is reflected as  
875 monomer equivalent. (C) SEC fidelity was tested by isolating  $M_s$  from fractions after fibril  
876 sonication. Remaining fractions were combined with  $M_i$ , and the mix was re-isolated by SEC.  
877 (D) In Group 1, after the first isolation, the monomer fraction (which contains  $M_s$ ) contained  
878 seeding activity. (E) In Group 2, after the second purification by SEC, the monomer fraction  
879 (which contains  $M_i$  spiked in) did not exhibit seeding activity. (F-H) Heat-induced dissociation  
880 of assemblies. (F) The SEC fraction containing  $M_s$  (B5) was heated to 95°C for 3h and re-  
881 isolated by SEC prior to testing the FRET biosensor assay. No loss in seeding activity was  
882 observed. (G) When the SEC fraction containing trimer (B8) was heated similarly, seeding  
883 activity shifted to fractions that contain dimer and monomer (B7, B5). (H) ~20-mer (A5) was  
884 largely stable to heating, although some smaller seed-competent assemblies were liberated.

885

886 **Figure 4: Heat denaturation of assemblies.** (A-D) Various assemblies were subjected to  
887 heat denaturation at the indicated temperatures and times, followed by analysis of seeding  
888 activity in the FRET biosensor assay. Whereas ~10-mer and ~20-mer were relatively stable  
889 from 65-95°C, monomer, dimer and trimer showed temperature-dependent loss of seeding  
890 activity. (E) Plot of denaturation data with multimodel regression curves superimposed.

891  
892 **Figure 5:  $M_s$  uniquely self-assembles.**  $M_i$  and  $M_s$  were incubated at 500nM or with  
893 equivalent amounts (monomer equivalent) of dimer and trimer for various times prior to  
894 resolution by SEC. (A)  $M_i$  alone shows no capacity for self-association. (B)  $M_s$  exhibits self-  
895 association over time. (C,D) Dimer and Trimer are stable when incubated over time. (E,F)  $M_s$   
896 reacts with dimer and trimer to form larger assemblies. (G,H)  $M_i$  does not react with dimer or  
897 trimer to form larger assemblies.

898  
899 **Figure 6: AD brain contains seed-competent monomer.** Tau from AD and control brains  
900 was immunoprecipitated and subjected to SEC. (A) SEC from control brain shows  
901 predominantly tau monomer. (B) SEC from AD brain shows a range of tau assembly sizes.  
902 (C) Monomer from AD brain has seeding activity, but not monomer from control brain. Tau  
903 Unit refers to the putative number of molecules per assembly; C = Lipofectamine control.  
904 (D,E) Control or AD tau monomer was incubated for 0 (graph D) or 24h (graph E) prior to  
905 SEC, and seeding activity was determined from each fraction. Pre-SEC samples are shown  
906 at the first data point. After 24h incubation, AD-derived tau monomer exhibited seeding  
907 activity in fractions consistent with larger assemblies. (F) AD-derived tau monomer was  
908 incubated for the indicated times prior to SEC and determination of seeding activity in each  
909 fraction. Larger seed-competent assemblies formed in a time-dependent fashion.

910  
911 **Figure 7. Unique XL-MS patterns for different forms of tau monomer.** Tau monomer was  
912 prepared as described and subjected to chemical crosslinking, digestion, and mass  
913 spectrometry to define intramolecular crosslinks. Cartoons represent crosslinks within the tau  
914 protein. Tau is shown in grey; RD is colored in red (R1), green (R2), blue (R3) and indigo  
915 (R4). High confidence XL-MS crosslinks are shown as light yellow lines; crosslinks consistent  
916 between the  $M_s$  and AD monomer are shown in red. (A)  $M_r$ : tau monomer prior to SEC. (B)  
917  $M_h$ : tau monomer exposed to heparin, isolated by SEC; (C)  $M_i$ : tau monomer isolated by  
918 SEC; (D)  $M_s$ : tau monomer from fragmented fibrils, isolated by SEC. (E) AD brains contain  
919 long-range intramolecular crosslinks very similar to those observed in  $M_s$  (from 150 to 259-  
920 290). (F) Tau monomer from controls lacks the long range contacts observed in monomer  
921 from AD.

922  
923 **Figure 8. Models of different tau structures.**  
924 XL-MS results were used as restraints in Rosetta to create selected structural models of (A)  
925  $M_r$ , (B)  $M_h$ , (C)  $M_i$ , (D)  $M_s$ , (E) Control monomer and (F) AD monomer. Tau protein sequence  
926 is shown in ribbon with the RD colored as in Figure 7. Regions between RD1/2 and RD2/3  
927 are expanded, highlighting the two amyloid forming regions, VQIINK (green spheres) and  
928 VQIVYK (blue spheres). Note that in  $M_h$ ,  $M_s$  and AD monomer the VQIINK and VQIVYK  
929 sequences are presented at the protein surface. In contrast, these regions are buried in  $M_r$ ,  
930  $M_i$  and control monomer. Please see Supplemental Movie files to better visualize the 3D  
931 orientation of specific regions.

932  
933 **Figure S1. XL-MS reveals differences in intramolecular crosslink distances between**  
934 **forms of tau monomer.** Contact plots for XL-MS data for (A)  $M_r$ ; (B)  $M_h$ ; (C)  $M_i$ ; (D)  $M_s$

935 reveal different crosslink distances. The sites of XL-MS pairs are shown as green dots.  
936 Magenta boxes highlight differences in crosslink distance between the tau conformers. RD =  
937 repeat domain. PD = projection domain.

938

939 **Figure S2. Different brain homogenization methods yield similar crosslink patterns.** AD  
940 brain sample was homogenized using four different treatments (**A**) Dounce homogenization,  
941 (**B**) Pulse sonication, (**C**) Mechanical homogenization and (**D**) Mechanical homogenization  
942 followed by pulse sonication. Cartoons represent crosslinks within the tau protein. Tau is  
943 shown in grey; RD is colored in red (R1), green (R2), blue (R3) and indigo (R4). High  
944 confidence XL-MS crosslinks are shown as light yellow lines; crosslinks consistent with the  
945 M<sub>s</sub> and AD monomers are shown in red.

946

947 **Figure S3. Crosslinks maps in models reveal local structure.** Models from Figure 8  
948 protein contact map tau monomer structures reveal differences in crosslink distances in the  
949 repeat domain. (**A-D**) Models of tau monomer structure with crosslinks (yellow lines)  
950 superimposed. (**E-F**) Plot of crosslink distance colored according the atom pair distance in  
951 angstroms (Å) with a gradient from blue-red-yellow). The sites of XL-MS pairs are shown as  
952 green dots.

953

954 **Table S1. Summary of XLMS datasets.**

955

956 **Supplemental Movie Files.** PyMol was used to create rotating movies of all structural  
957 models for recombinant forms of tau (M<sub>r</sub>, M<sub>h</sub>, M<sub>i</sub> and M<sub>s</sub>) and monomer derived from Control 1  
958 and AD 1 patient brains. We note that the model predicts that seed-competent forms of tau  
959 (M<sub>h</sub>, M<sub>s</sub>, AD) feature one or both VQIINK/VQIVYK sequences exposed. Inert forms of tau (M<sub>r</sub>,  
960 M<sub>i</sub>, Control) feature these sequences relatively buried in hairpin structures. In tau derived  
961 from Control 1, the model predicts that VQIINK and VQIVYK sequences interact with one  
962 another within the monomer.



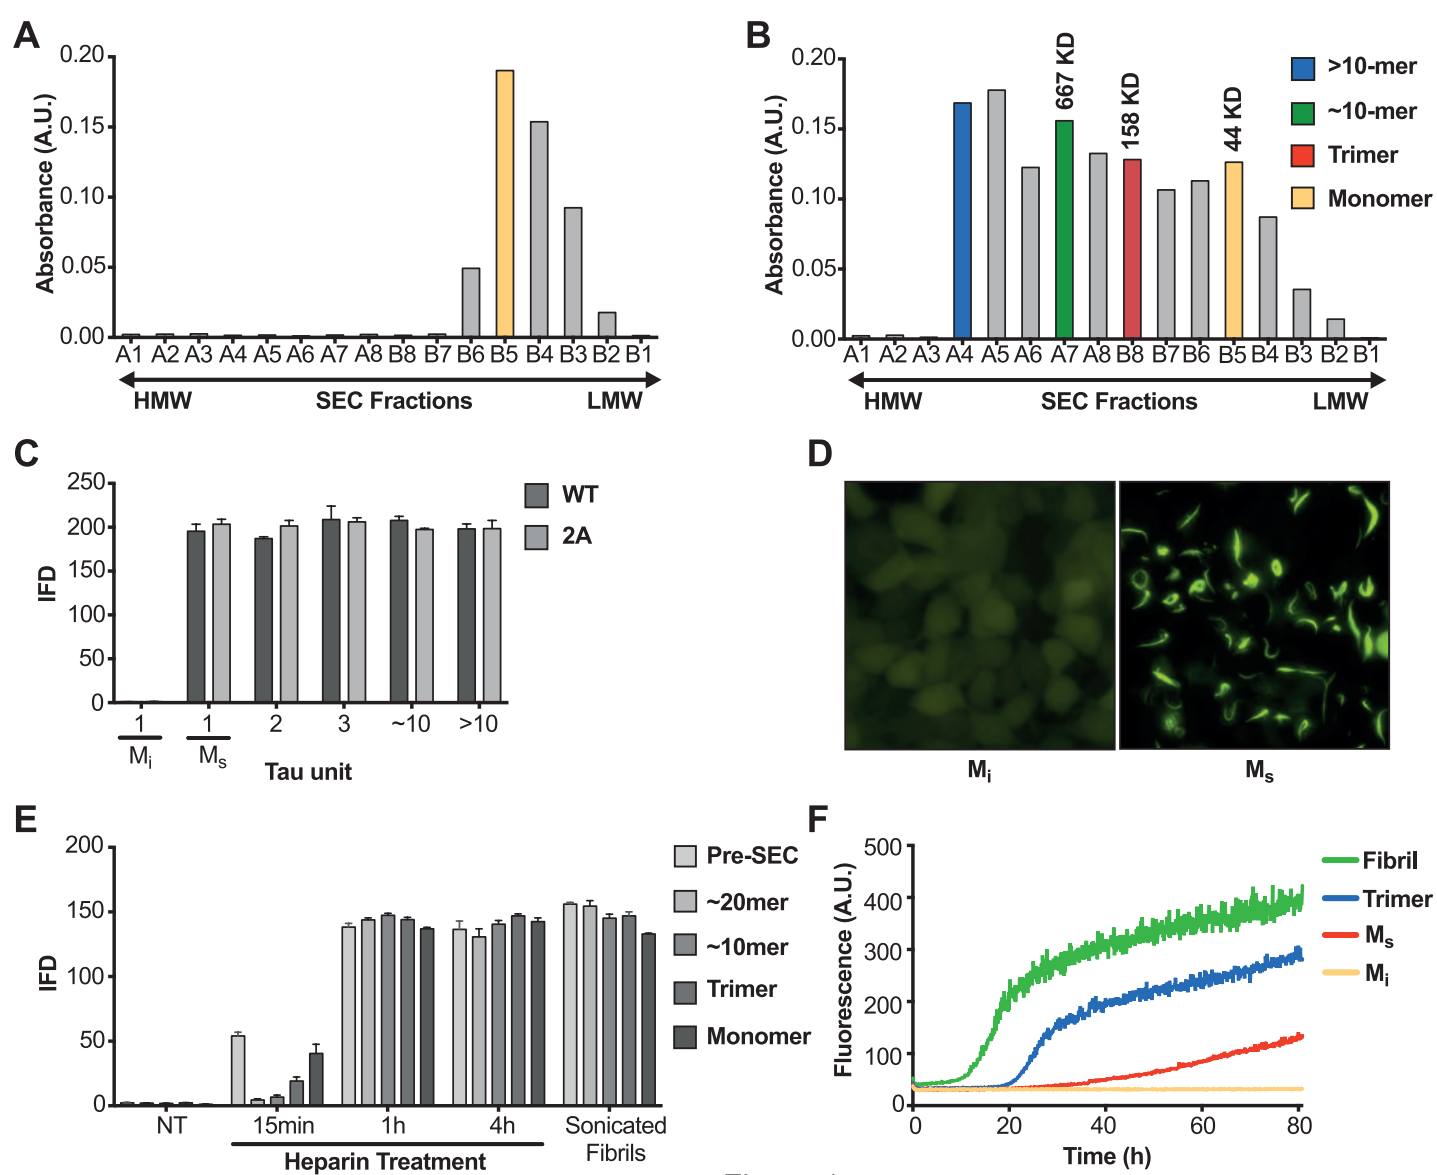

Figure 1

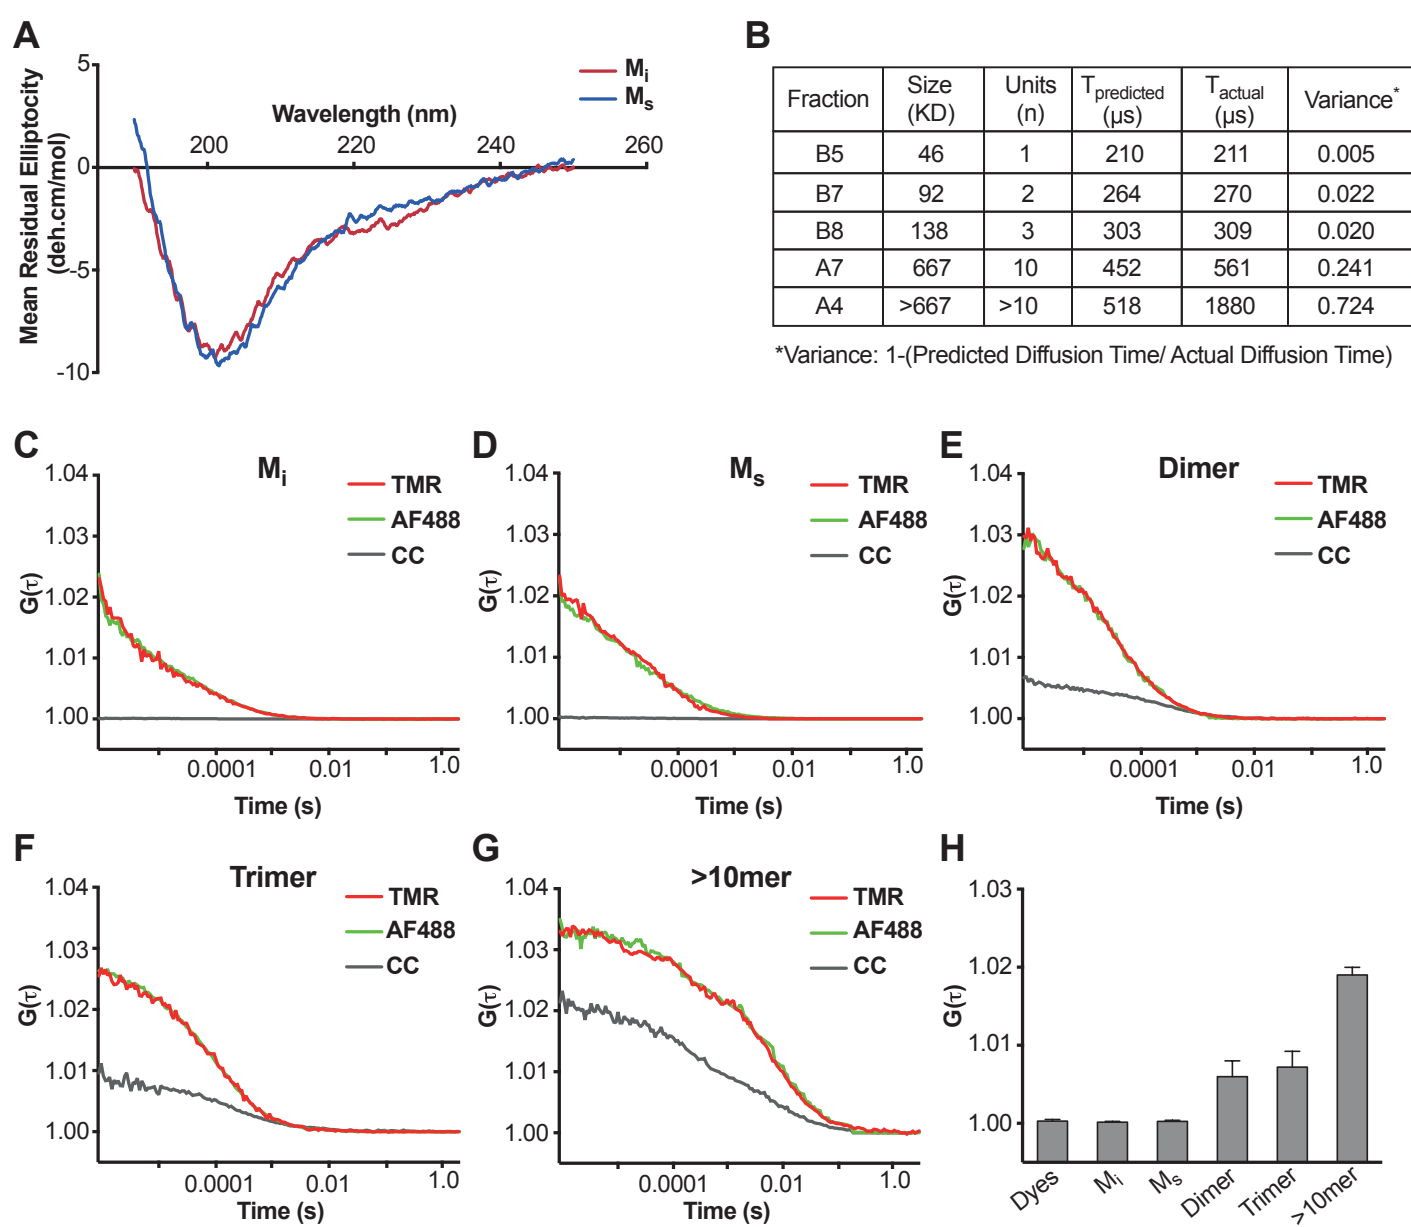

Figure 2

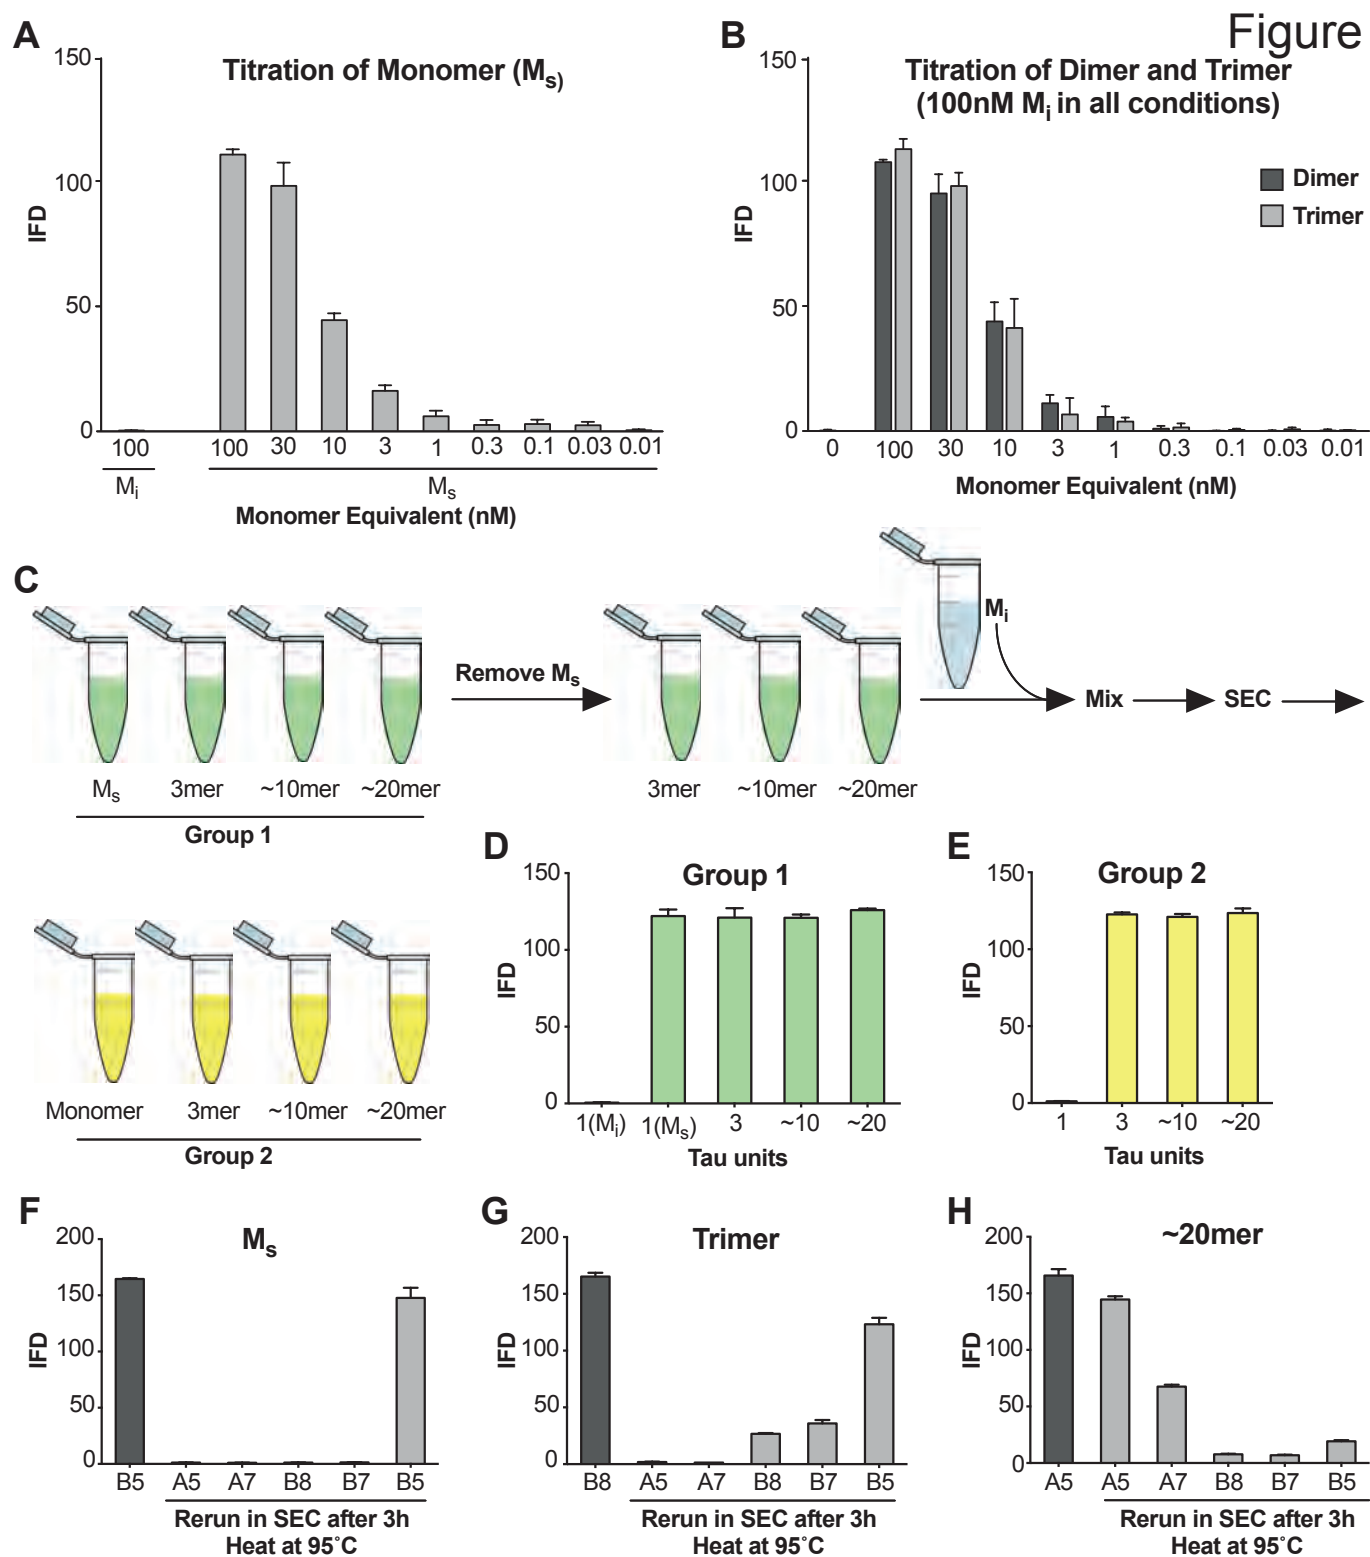

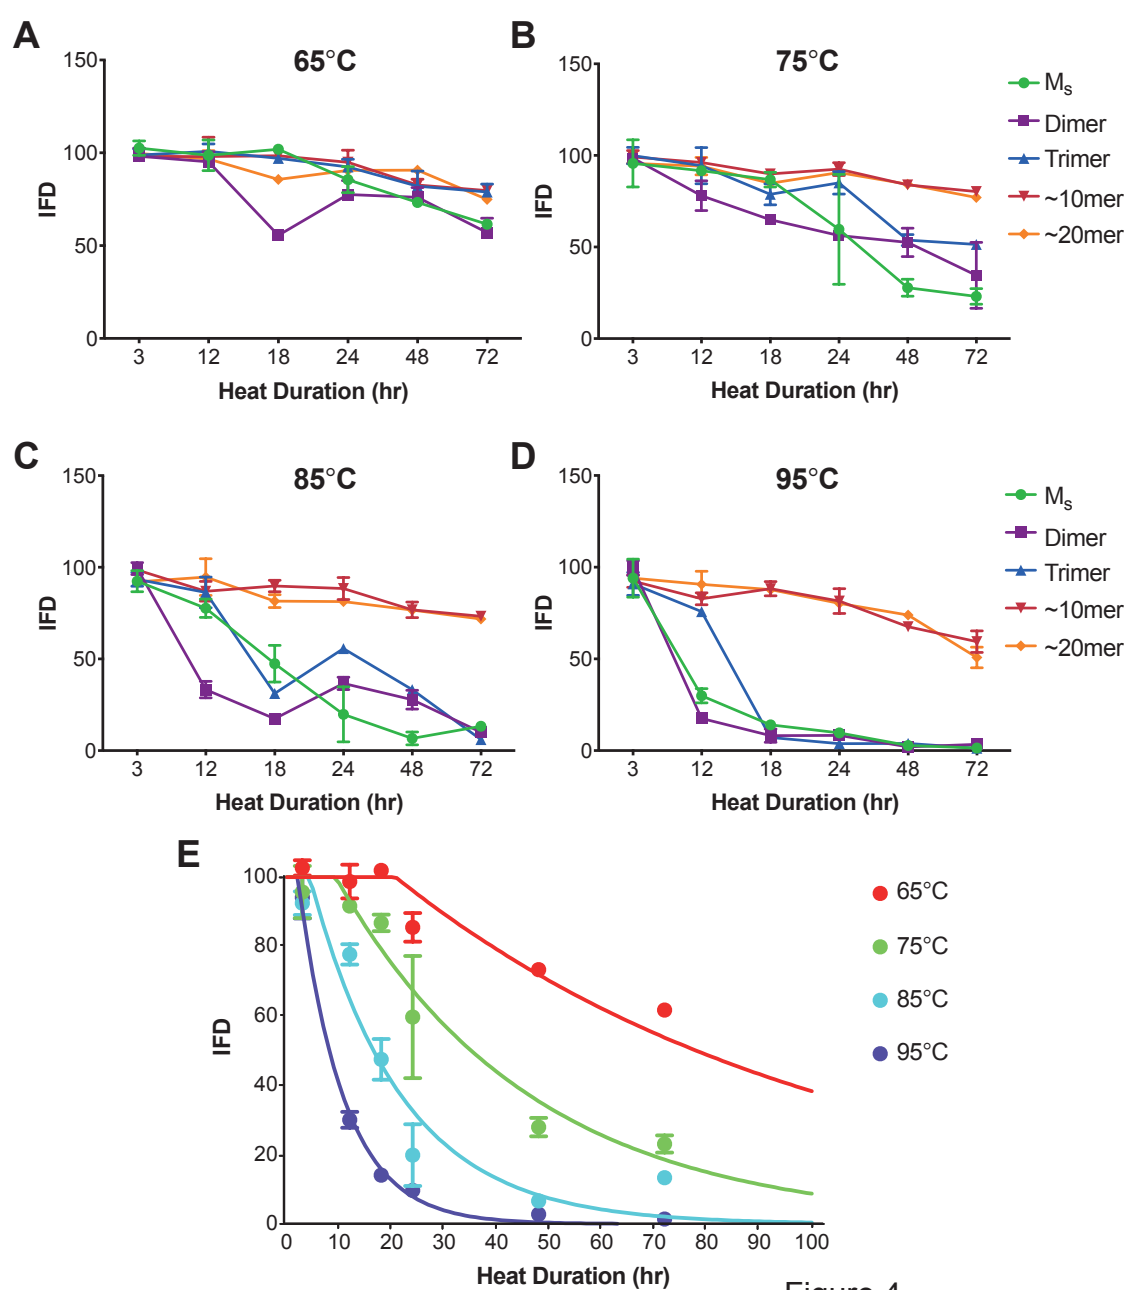

Figure 4

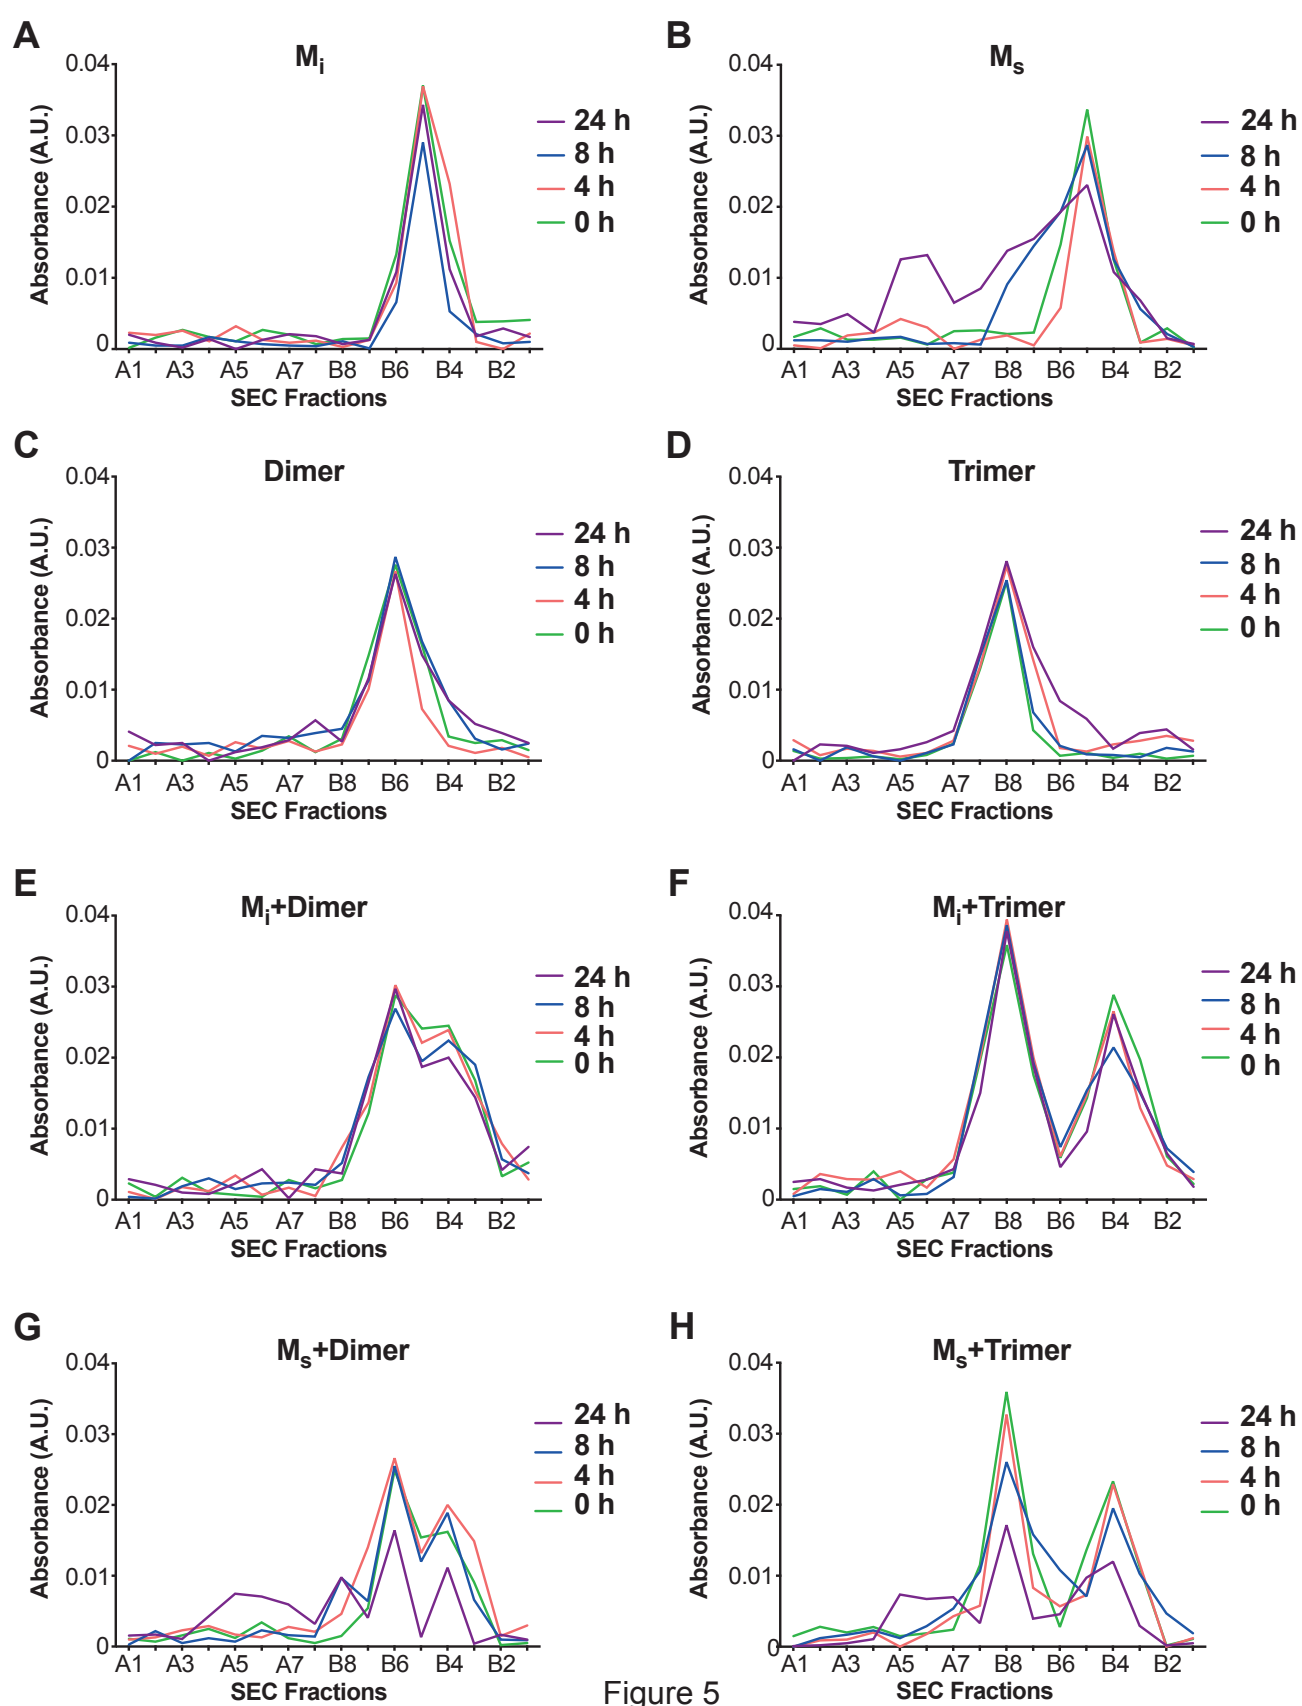

Figure 5



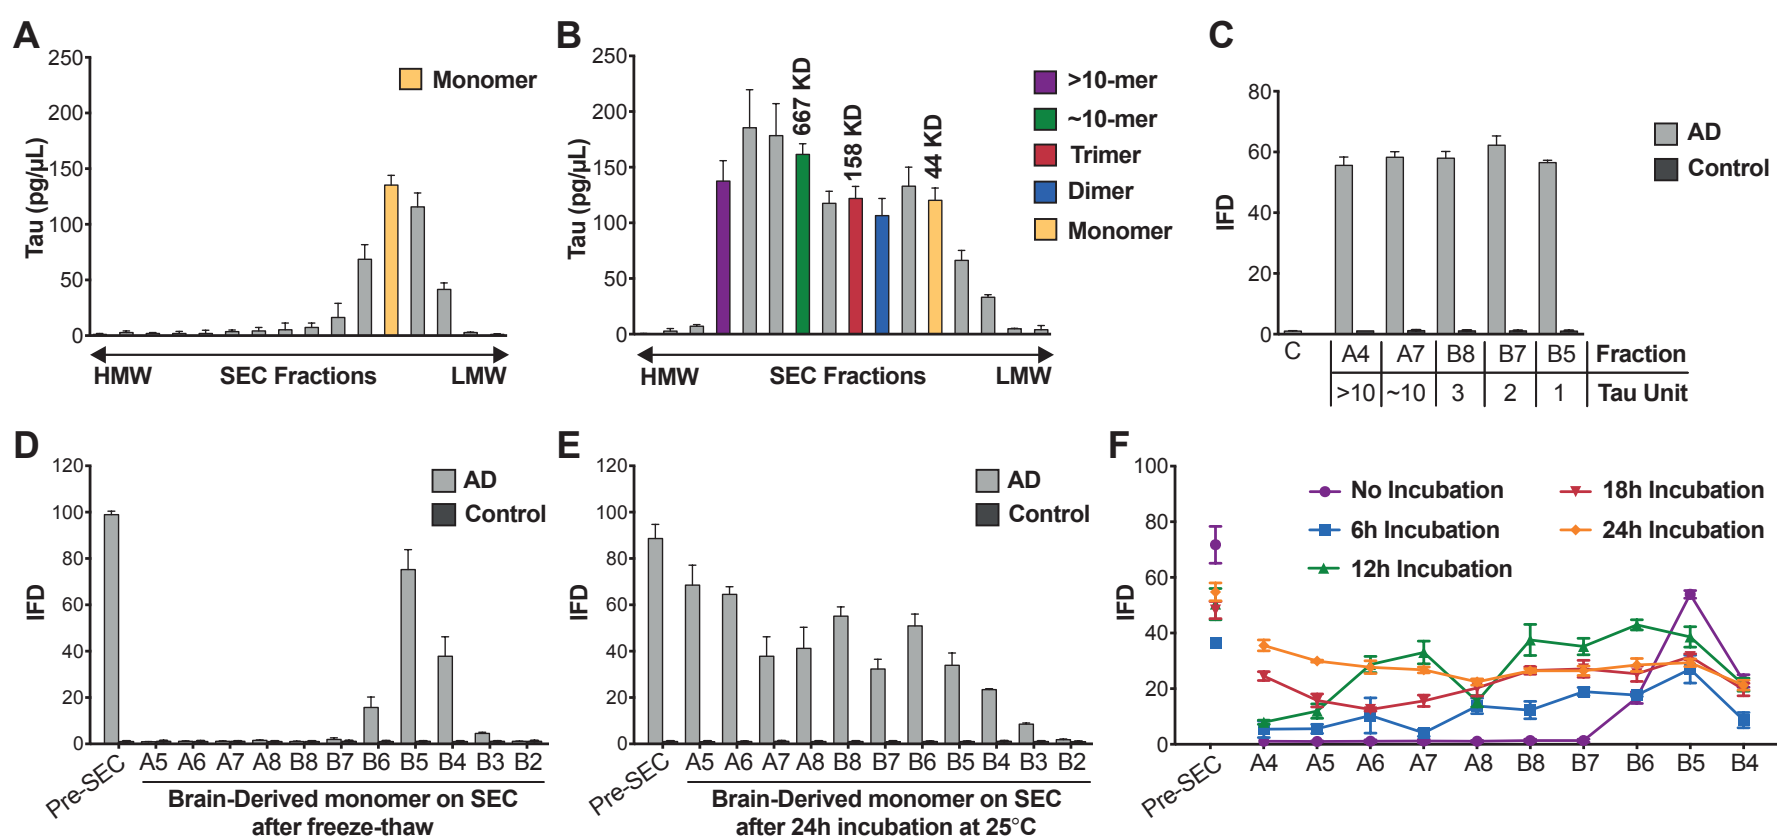

Figure 6

**A**

$M_r$

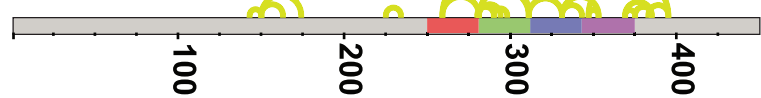

**B**

$M_h$

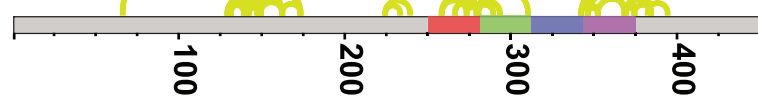

**C**

$M_i$

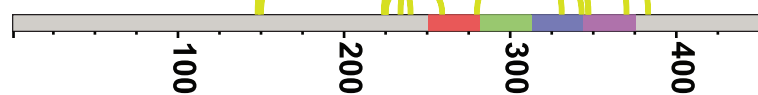

**D**

$M_s$

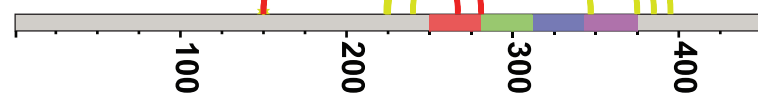

Controls

AD Brains

**E**

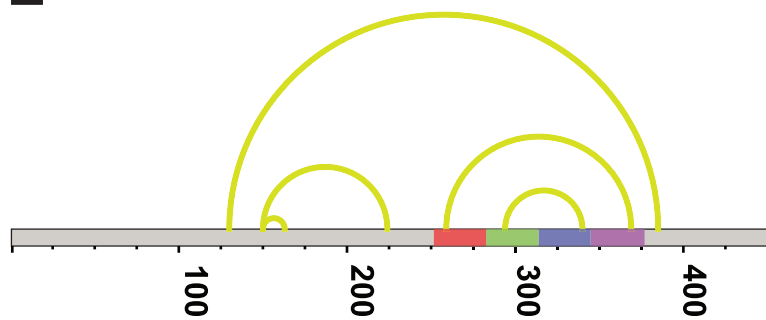

**F**

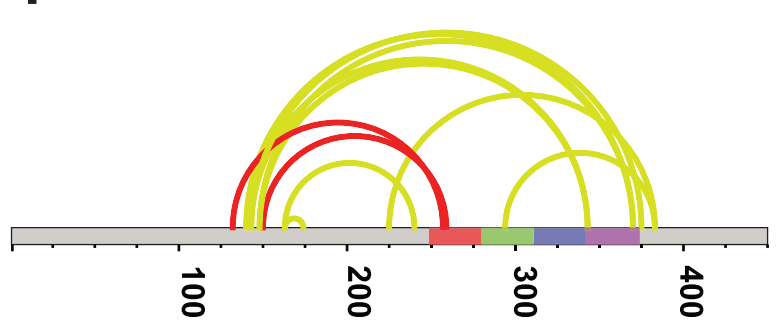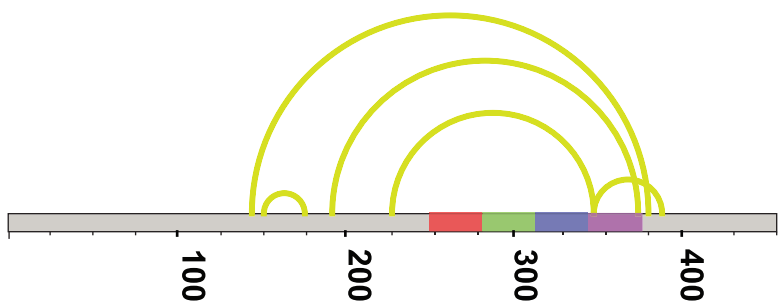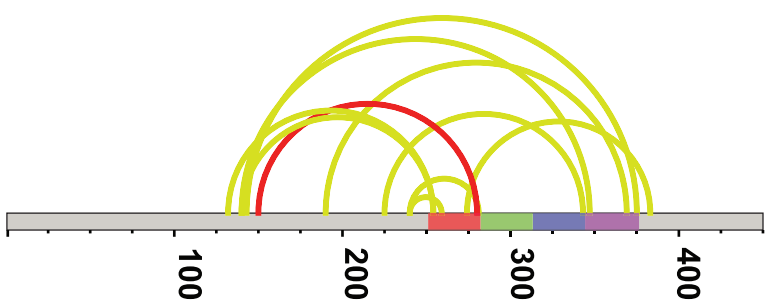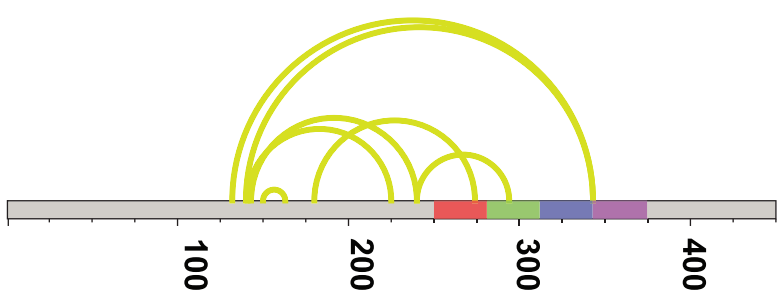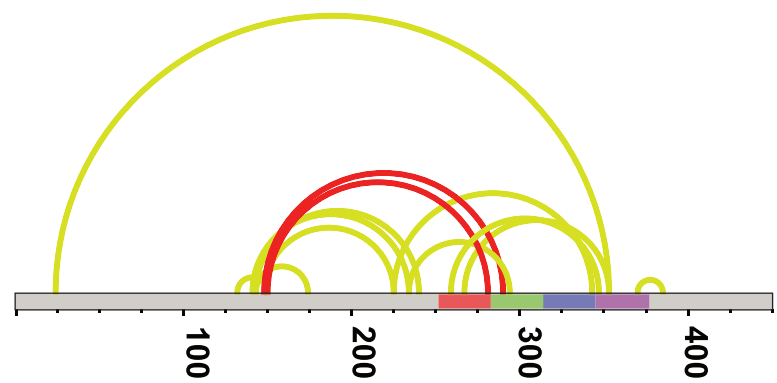

Figure 7

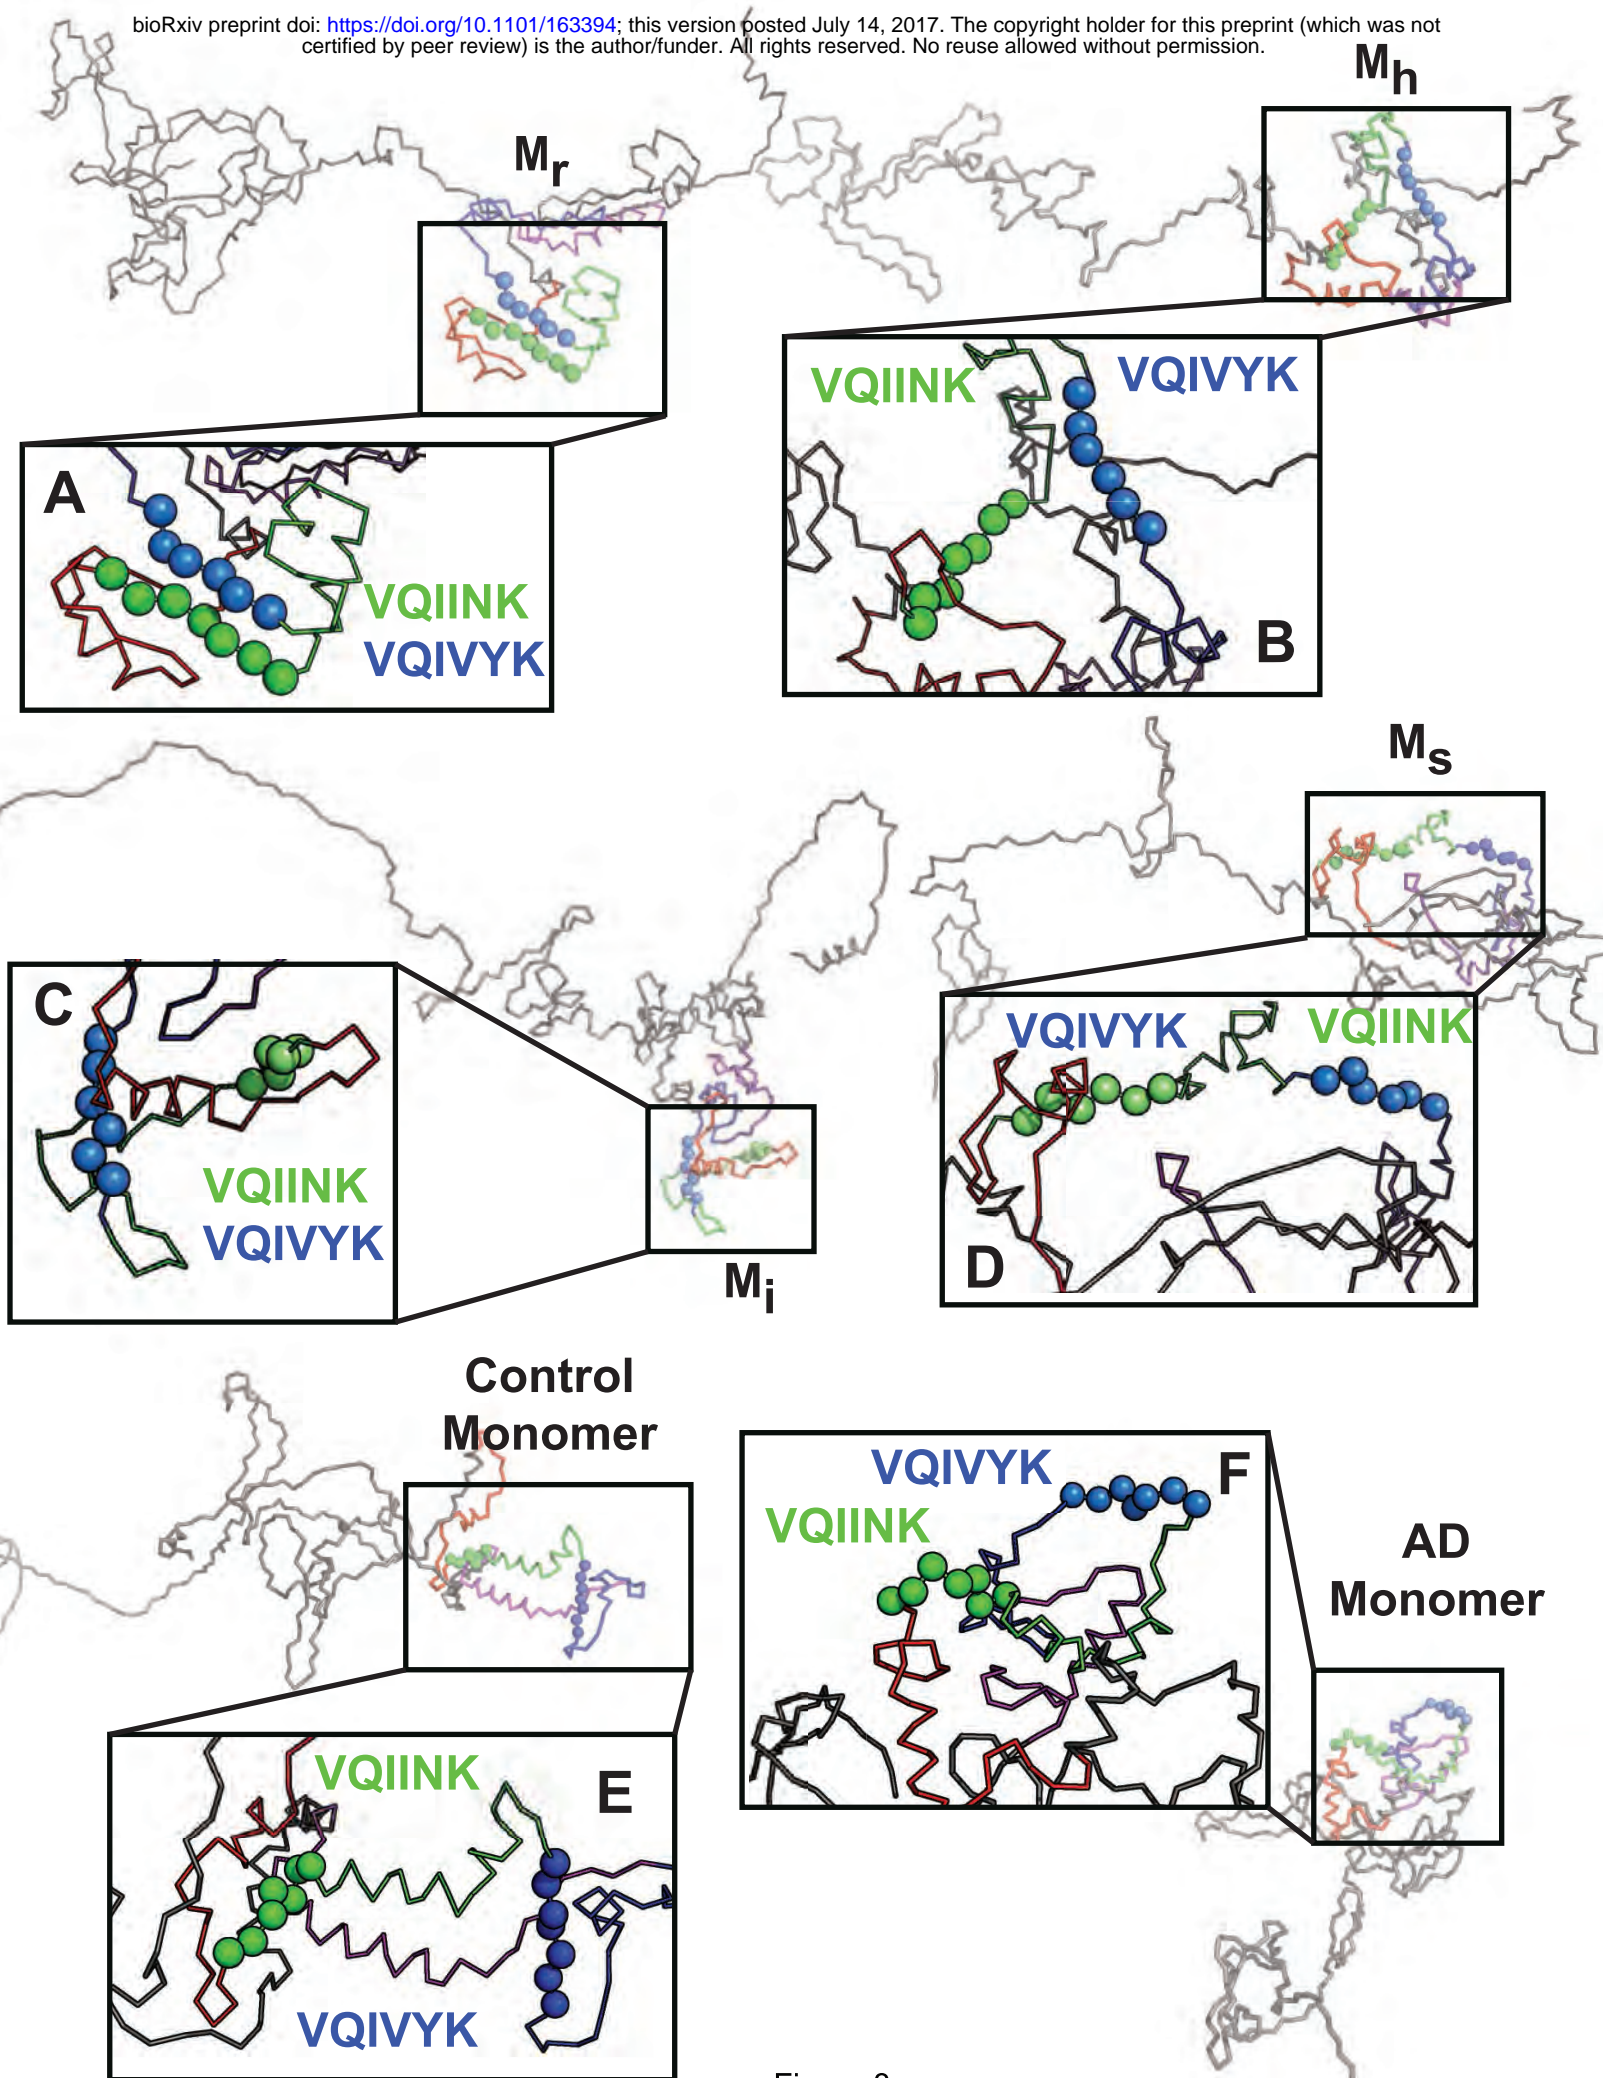

Figure 8

**A**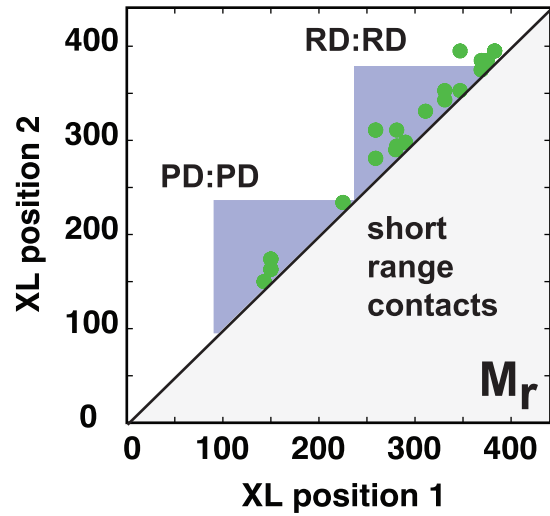**B**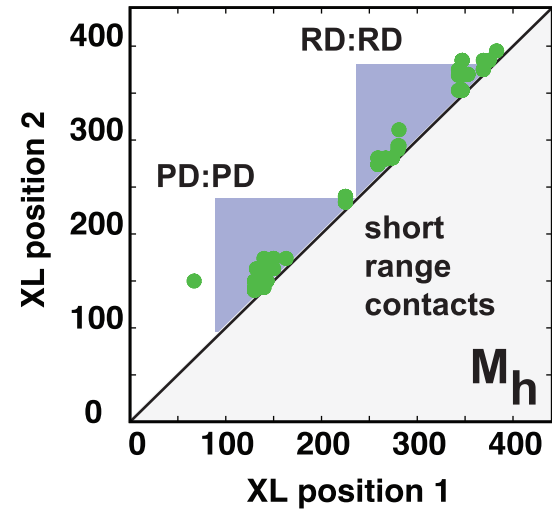**C**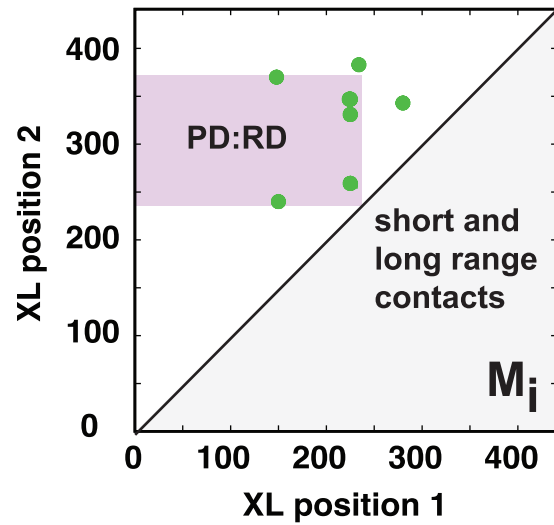**D**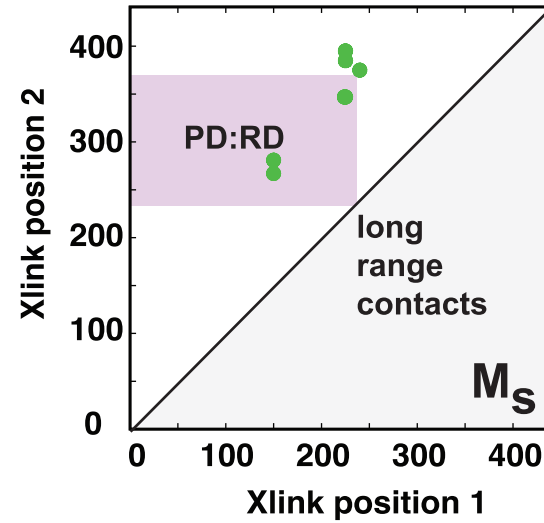

**A****Dounce Homogenization**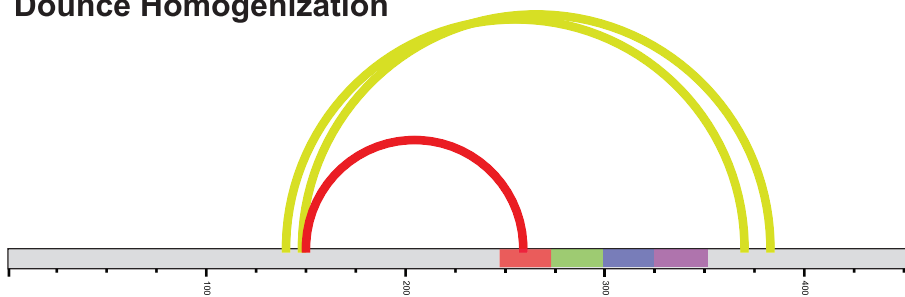**C****Mechanical Homogenization**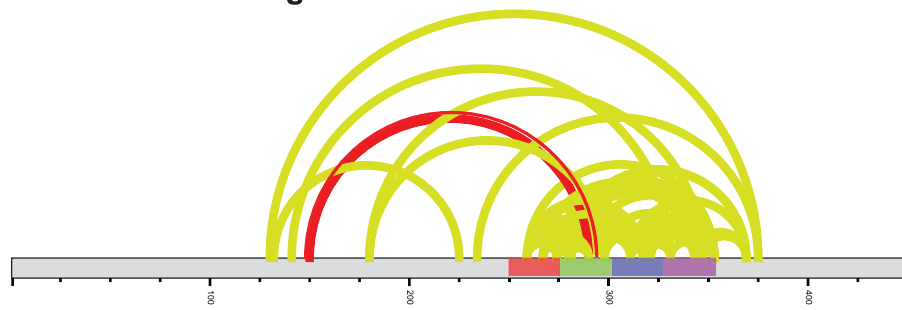**B****Pulse Sonication**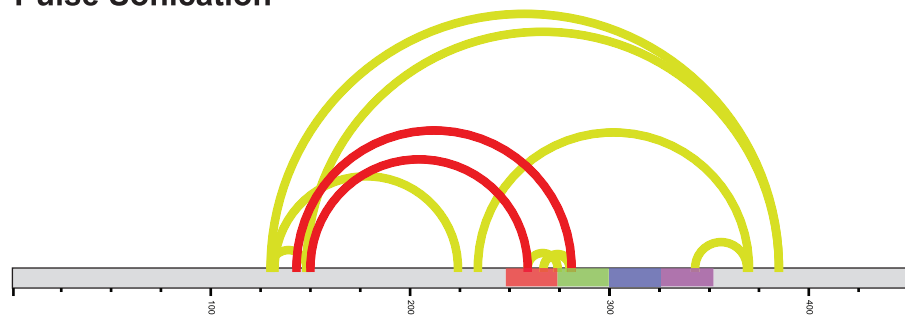**D****Mechanical Homogenization  
Pulse Sonication**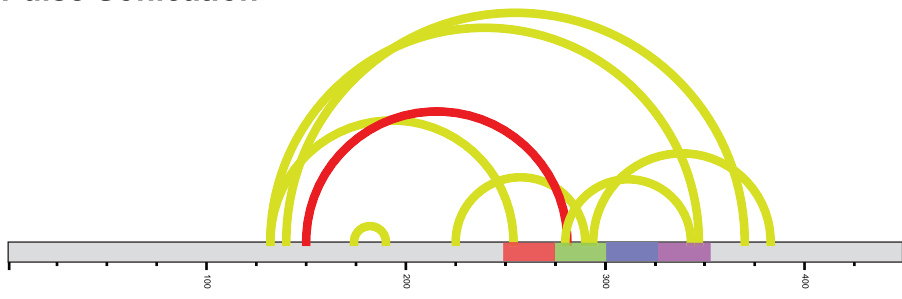



**A**

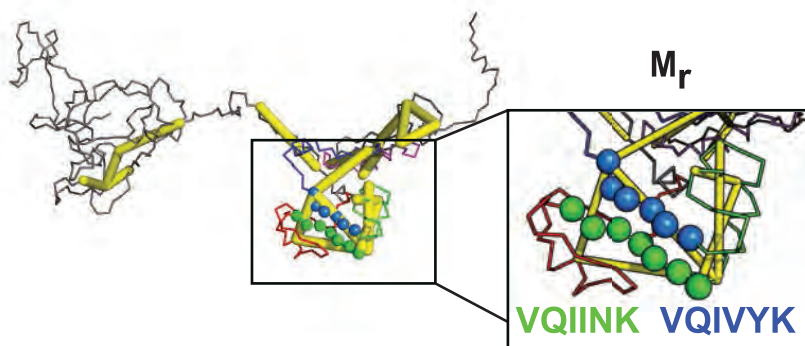

**E**

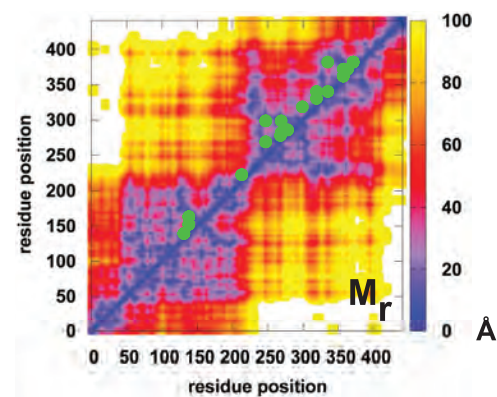

**B**

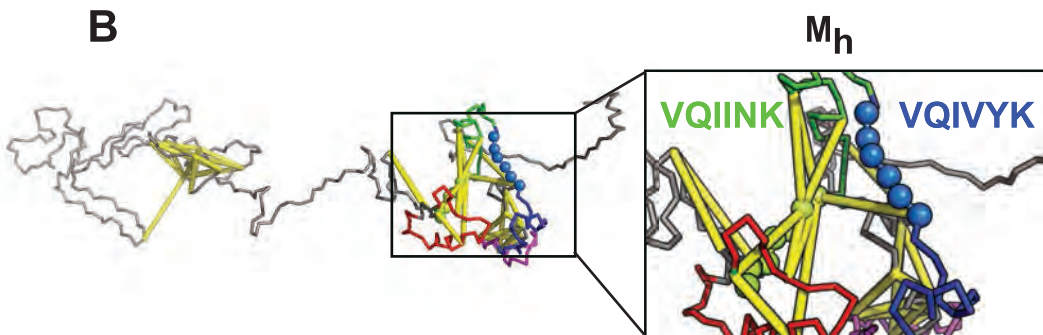

**F**

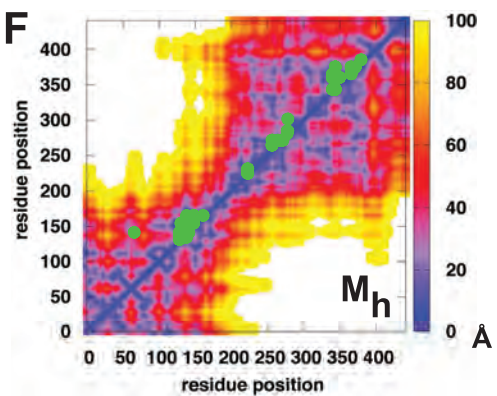

**C**

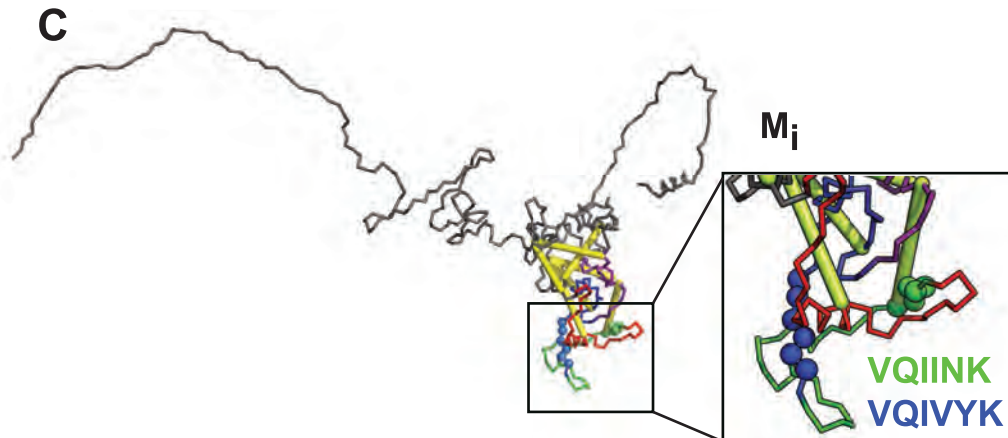

**G**

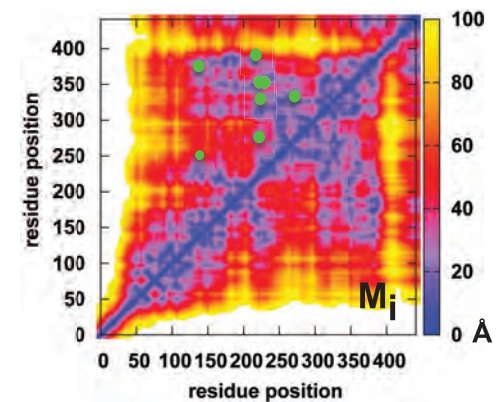

**D**

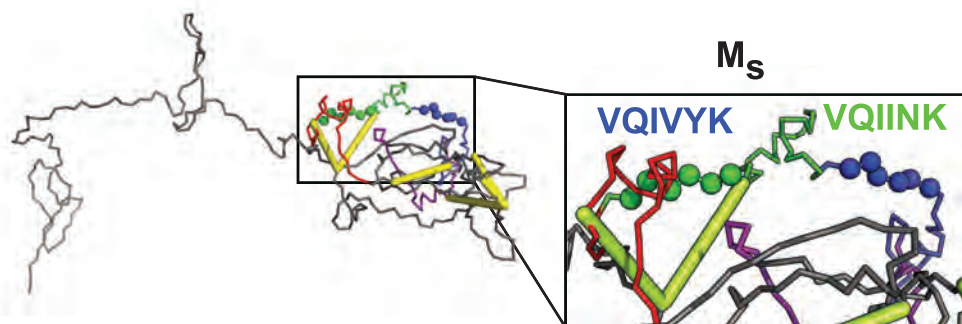

**H**

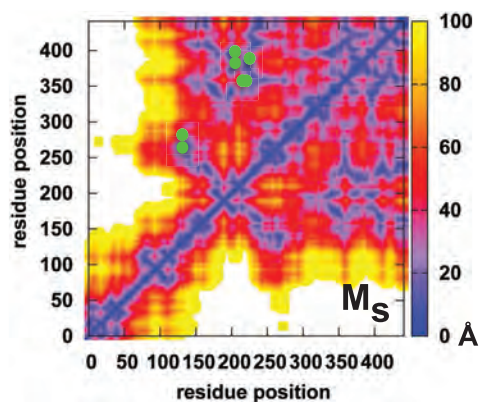

## Description of Column Headers

|                    |                                                                                                                                                                                                                   |
|--------------------|-------------------------------------------------------------------------------------------------------------------------------------------------------------------------------------------------------------------|
| <i>Id</i>          | Assigned peptides and cross-linking sites within the <i>peptide</i> sequences. The longer peptide is designated as (a)lpha, the shorter as (b)eta. Multiple positions are given in case of ambiguous assignments. |
| <i>Protein1</i>    | SwissProt/UniProt accession number and identifier of the protein 1 (containing peptide designated as alpha).                                                                                                      |
| <i>Protein2</i>    | SwissProt/UniProt accession number and identifier of the protein 2 (containing peptide designated as beta).                                                                                                       |
| <i>XL Type</i>     | Type of cross-linked peptide                                                                                                                                                                                      |
| <i>AbsPos1</i>     | Position in the protein sequence of protein 1, multiple positions are given in case of ambiguous assignments.                                                                                                     |
| <i>AbsPos2</i>     | Position in the protein sequence of protein 2, multiple positions are given in case of ambiguous assignments.                                                                                                     |
| <i>deltaAA</i>     | Delta between the absolute positions of the cross-linked residues                                                                                                                                                 |
| <i>Mr</i>          | Molecular mass calculated from experimental $m/z$ and $z$ (neutral mass).                                                                                                                                         |
| <i>Mz</i>          | Experimentally observed mass-to-charge ratio of the precursor ion in Da.                                                                                                                                          |
| <i>z</i>           | Experimentally observed precursor charge.                                                                                                                                                                         |
| <i>Error [ppm]</i> | Deviation between experimental and theoretical mass in ppm.                                                                                                                                                       |
| <i>Id-score</i>    | Identification score as assigned by xQuest.                                                                                                                                                                       |

## Mi XL-MS Data

| Id                                       | Protein1           | Protein2           | Type  | XLType           | AbsPos1 | AbsPos2 | deltaAA | Mr       | Mz      | z | Error_rel[ppm] | Id-Score |
|------------------------------------------|--------------------|--------------------|-------|------------------|---------|---------|---------|----------|---------|---|----------------|----------|
| EPKVVAVVR-LDFKDR-a4-b4                   | TAU_HUMAN P10636-8 | TAU_HUMAN P10636-8 | xlink | intra-protein xl | 225     | 347     | 122     | 1955.113 | 652.712 | 3 | -3.8           | 12.57    |
| TPSLPTPPREPCK-SEKLDKDR-a13-b7            | TAU_HUMAN P10636-8 | TAU_HUMAN P10636-8 | xlink | intra-protein xl | 224     | 347     | 123     | 2822.511 | 941.845 | 3 | -2.4           | 11.97    |
| VTSKCGSLGNIHHKPGGGQVEVKSEK-KVAVVR-a14-b1 | TAU_HUMAN P10636-8 | TAU_HUMAN P10636-8 | xlink | intra-protein xl | 331     | 225     | 106     | 3540.91  | 886.235 | 4 | -2.7           | 11.61    |
| SEKLDKDR-VQIINKK-a3-b6                   | TAU_HUMAN P10636-8 | TAU_HUMAN P10636-8 | xlink | intra-protein xl | 343     | 280     | 63      | 2116.186 | 706.403 | 3 | -1.7           | 11.27    |
| AKGADGKTK-KIETHK-a7-b1                   | TAU_HUMAN P10636-8 | TAU_HUMAN P10636-8 | xlink | intra-protein xl | 148     | 370     | 222     | 1766.99  | 590.004 | 3 | 0.5            | 11.23    |
| VAVVRTPPKSPSSAK-LTFRENAKAK-a9-b8         | TAU_HUMAN P10636-8 | TAU_HUMAN P10636-8 | xlink | intra-protein xl | 234     | 383     | 149     | 2837.603 | 710.409 | 4 | -3.4           | 10.92    |
| TPPKSPSSAKSR-TKIATPR-a10-b2              | TAU_HUMAN P10636-8 | TAU_HUMAN P10636-8 | xlink | intra-protein xl | 240     | 150     | 90      | 2165.223 | 722.749 | 3 | 2.9            | 10.39    |
| SKIGSTENLK-EPKVVAVVR-a2-b4               | TAU_HUMAN P10636-8 | TAU_HUMAN P10636-8 | xlink | intra-protein xl | 259     | 225     | 34      | 2238.284 | 747.103 | 3 | -4.6           | 10.26    |

## Ms XL-MS Data

| Id                                       | Protein1           | Protein2           | Type  | XLType         | AbsPos1 | AbsPos2 | deltaAA | Mr       | Mz       | z | Error_rel[ppm] | Id-Score |
|------------------------------------------|--------------------|--------------------|-------|----------------|---------|---------|---------|----------|----------|---|----------------|----------|
| IGSTENLKHQPGGGKVQIINK-GADGKTKIATPR-a8-b7 | TAU_HUMAN P10636-8 | TAU_HUMAN P10636-8 | xlink | ntra-protein > | 267     | 150     | 117     | 3568.968 | 1190.664 | 3 | -0.4           | 18.94    |
| AKTDHGAEIVYKSPVVSVDTSR-KVAVVRTPPK-a12-b1 | TAU_HUMAN P10636-8 | TAU_HUMAN P10636-8 | xlink | ntra-protein > | 395     | 225     | 170     | 3645.003 | 912.259  | 4 | 3.8            | 14.62    |
| EPKKVAVVR-LDFKDR-a3-b4                   | TAU_HUMAN P10636-8 | TAU_HUMAN P10636-8 | xlink | ntra-protein > | 224     | 347     | 123     | 1955.111 | 652.711  | 3 | -4.9           | 13.25    |
| AKTDHGAEIVYKSPVVSVDTSR-KVAVVRTPPK-a2-b1  | TAU_HUMAN P10636-8 | TAU_HUMAN P10636-8 | xlink | ntra-protein > | 385     | 225     | 160     | 3645.003 | 912.259  | 4 | 3.8            | 12.98    |
| EPKKVAVVR-LDFKDR-a4-b4                   | TAU_HUMAN P10636-8 | TAU_HUMAN P10636-8 | xlink | ntra-protein > | 225     | 347     | 122     | 1955.111 | 652.711  | 3 | -4.9           | 12.25    |
| TPPKSPSSAKSR-KIETHKLTFR-a10-b6           | TAU_HUMAN P10636-8 | TAU_HUMAN P10636-8 | xlink | ntra-protein > | 240     | 375     | 135     | 2651.475 | 663.877  | 4 | -0.3           | 10.79    |
| KLDLSNVQSK-TKIATPR-a1-b2                 | TAU_HUMAN P10636-8 | TAU_HUMAN P10636-8 | xlink | ntra-protein > | 281     | 150     | 131     | 2054.18  | 685.735  | 3 | 3.3            | 10.38    |

## Mh XL-MS Data

|                                             | Protein1           | Protein2           | Type  | XLType         | AbsPos1 | AbsPos2 | deltaAA | Mr       | Mz       | z | Error_rel[ppm] | ld-Score |
|---------------------------------------------|--------------------|--------------------|-------|----------------|---------|---------|---------|----------|----------|---|----------------|----------|
| VQSKIGSLDNITHVPGGGNK-SEKLDKDR-a4-b7         | TAU_HUMAN P10636-8 | TAU_HUMAN P10636-8 | xlink | ntra-protein > | 353     | 347     | 6       | 3294.737 | 824.692  | 4 | 4.8            | 44.77    |
| VQSKIGSLDNITHVPGGGNK-SEKLDKDR-a4-b3         | TAU_HUMAN P10636-8 | TAU_HUMAN P10636-8 | xlink | ntra-protein > | 353     | 343     | 10      | 3294.736 | 824.692  | 4 | 4.7            | 44.15    |
| IGSLDNITHVPGGGNKK-IETHKLTFR-a16-b5          | TAU_HUMAN P10636-8 | TAU_HUMAN P10636-8 | xlink | ntra-protein > | 369     | 375     | 6       | 2987.631 | 747.916  | 4 | 4.1            | 43.9     |
| IGSTENLKHQPGGGK-VQIINK-a8-b6                | TAU_HUMAN P10636-8 | TAU_HUMAN P10636-8 | xlink | ntra-protein > | 267     | 280     | 13      | 2501.408 | 834.811  | 3 | 4.7            | 41.5     |
| AKTDHGAEIVYK-IETHKLTFR-a2-b5                | TAU_HUMAN P10636-8 | TAU_HUMAN P10636-8 | xlink | ntra-protein > | 385     | 375     | 10      | 2612.405 | 654.109  | 4 | 3.5            | 41.19    |
| IGSLDNITHVPGGGNKK-AKTDHGAEIVYK-a16-b2       | TAU_HUMAN P10636-8 | TAU_HUMAN P10636-8 | xlink | ntra-protein > | 369     | 385     | 16      | 3174.679 | 794.678  | 4 | 3.8            | 41       |
| TDHGAEIVYKSPVSGDTPR-ENAKAK-a10-b4           | TAU_HUMAN P10636-8 | TAU_HUMAN P10636-8 | xlink | ntra-protein > | 395     | 383     | 12      | 3011.535 | 603.315  | 5 | 4.9            | 40.77    |
| VQSKIGSLDNITHVPGGGNK-LDFKDR-a4-b4           | TAU_HUMAN P10636-8 | TAU_HUMAN P10636-8 | xlink | ntra-protein > | 353     | 347     | 6       | 2950.565 | 591.121  | 5 | 4.8            | 39.59    |
| SKDGTGSDDKK-TKIATPR-a2-b2                   | TAU_HUMAN P10636-8 | TAU_HUMAN P10636-8 | xlink | ntra-protein > | 132     | 150     | 18      | 2060.082 | 516.028  | 4 | 3.4            | 39.26    |
| AKGADGK-TKIATPR-a2-b2                       | TAU_HUMAN P10636-8 | TAU_HUMAN P10636-8 | xlink | ntra-protein > | 143     | 150     | 7       | 1568.892 | 393.231  | 4 | 2.1            | 39.24    |
| LDLSNVQSKAGSK-VQIINK-a9-b6                  | TAU_HUMAN P10636-8 | TAU_HUMAN P10636-8 | xlink | ntra-protein > | 290     | 280     | 10      | 2325.337 | 582.342  | 4 | 4.5            | 38.61    |
| AKGADGK-TKIATPR-a2-b2                       | TAU_HUMAN P10636-8 | TAU_HUMAN P10636-8 | xlink | ntra-protein > | 143     | 150     | 7       | 1568.893 | 393.231  | 4 | 4.1            | 38.24    |
| IPAKTPPAPK-TKIATPR-a4-b2                    | TAU_HUMAN P10636-8 | TAU_HUMAN P10636-8 | xlink | ntra-protein > | 174     | 150     | 24      | 1942.17  | 486.55   | 4 | 3.5            | 37.76    |
| KDLSNVQSK-AGSKDNK-a1-b4                     | TAU_HUMAN P10636-8 | TAU_HUMAN P10636-8 | xlink | ntra-protein > | 281     | 294     | 13      | 2100.152 | 701.058  | 3 | 4.4            | 37.75    |
| IGSLDNITHVPGGGNKK-IETHKLTFR-a16-b5          | TAU_HUMAN P10636-8 | TAU_HUMAN P10636-8 | xlink | ntra-protein > | 369     | 375     | 6       | 2987.633 | 747.916  | 4 | 4.6            | 37.09    |
| VQSKIGSLDNITHVPGGGNK-LDFKDR-a4-b4           | TAU_HUMAN P10636-8 | TAU_HUMAN P10636-8 | xlink | ntra-protein > | 353     | 347     | 6       | 3078.657 | 616.739  | 5 | 3.5            | 36.99    |
| GAAPPGQKQANATR-GADGKTK-a8-b5                | TAU_HUMAN P10636-8 | TAU_HUMAN P10636-8 | xlink | ntra-protein > | 163     | 148     | 15      | 2236.164 | 560.049  | 4 | 3.7            | 36.57    |
| SKDGTGSDDKK-GADGKTK-a10-b5                  | TAU_HUMAN P10636-8 | TAU_HUMAN P10636-8 | xlink | ntra-protein > | 140     | 148     | 8       | 1949.962 | 650.995  | 3 | 3.9            | 36.56    |
| SKDGTGSDDKK-TKIATPR-a10-b2                  | TAU_HUMAN P10636-8 | TAU_HUMAN P10636-8 | xlink | ntra-protein > | 140     | 150     | 10      | 2060.083 | 687.702  | 3 | 3.7            | 35.7     |
| IGSTENLKHQPGGGK-KDLSNVQSK-a8-b1             | TAU_HUMAN P10636-8 | TAU_HUMAN P10636-8 | xlink | ntra-protein > | 267     | 281     | 14      | 2790.5   | 698.633  | 4 | 4.6            | 35.64    |
| HQPGGGKQIINK-KDLSNVQSK-a7-b1                | TAU_HUMAN P10636-8 | TAU_HUMAN P10636-8 | xlink | ntra-protein > | 274     | 281     | 7       | 2643.48  | 529.704  | 5 | 3.5            | 35.13    |
| IETHKLTFR-SEKLDKDR-a5-b3                    | TAU_HUMAN P10636-8 | TAU_HUMAN P10636-8 | xlink | ntra-protein > | 375     | 343     | 32      | 2418.297 | 484.667  | 5 | 2.5            | 34.61    |
| AKTDHGAEIVYK-KIETHKLTFR-a2-b6               | TAU_HUMAN P10636-8 | TAU_HUMAN P10636-8 | xlink | ntra-protein > | 385     | 375     | 10      | 2740.501 | 686.133  | 4 | 3.5            | 34.09    |
| AKTDHGAEIVYK-SEKLDKDR-a2-b7                 | TAU_HUMAN P10636-8 | TAU_HUMAN P10636-8 | xlink | ntra-protein > | 385     | 347     | 38      | 2605.351 | 652.346  | 4 | 4.8            | 34.04    |
| AGSKDNK-VQIINK-a4-b6                        | TAU_HUMAN P10636-8 | TAU_HUMAN P10636-8 | xlink | ntra-protein > | 294     | 280     | 14      | 1811.06  | 604.695  | 3 | 4.9            | 33.37    |
| IPAKTPPAPK-TKIATPR-a4-b2                    | TAU_HUMAN P10636-8 | TAU_HUMAN P10636-8 | xlink | ntra-protein > | 174     | 150     | 24      | 1942.169 | 486.55   | 4 | 4.7            | 33.21    |
| VQSKIGSLDNITHVPGGGNK-KIETHK-a4-b1           | TAU_HUMAN P10636-8 | TAU_HUMAN P10636-8 | xlink | ntra-protein > | 353     | 370     | 17      | 2912.585 | 971.87   | 3 | 3.5            | 33.12    |
| GAAPPGQKQANATR-SKDGTGSDDKK-a8-b2            | TAU_HUMAN P10636-8 | TAU_HUMAN P10636-8 | xlink | ntra-protein > | 163     | 132     | 31      | 2697.344 | 675.344  | 4 | 4.4            | 32.9     |
| SKDGTGSDDKK-AKGADGK-a10-b2                  | TAU_HUMAN P10636-8 | TAU_HUMAN P10636-8 | xlink | ntra-protein > | 140     | 143     | 3       | 1919.951 | 640.992  | 3 | 4              | 32.84    |
| AKGADGK-XVSKSK-a2-b4                        | TAU_HUMAN P10636-8 | TAU_HUMAN P10636-8 | xlink | ntra-protein > | 143     | 130     | 13      | 1477.786 | 493.603  | 3 | 3.7            | 32.58    |
| TPPKSPSSAK-KVAVVR-a4-b1                     | TAU_HUMAN P10636-8 | TAU_HUMAN P10636-8 | xlink | ntra-protein > | 234     | 225     | 9       | 1807.063 | 452.774  | 4 | 3.3            | 32.07    |
| HQPGGGKQIINK-SKIGSTENLK-a7-b2               | TAU_HUMAN P10636-8 | TAU_HUMAN P10636-8 | xlink | ntra-protein > | 274     | 259     | 15      | 2588.442 | 648.118  | 4 | 5              | 32.06    |
| DGTGSDDKK-MVSKSK-a8-b4                      | TAU_HUMAN P10636-8 | TAU_HUMAN P10636-8 | xlink | ntra-protein > | 140     | 130     | 10      | 1737.851 | 580.291  | 3 | 2.9            | 32.05    |
| HQPGGGKQIINK-SKIGSTENLK-a7-b2               | TAU_HUMAN P10636-8 | TAU_HUMAN P10636-8 | xlink | ntra-protein > | 274     | 259     | 15      | 2588.441 | 648.118  | 4 | 4.7            | 31.96    |
| SKDGTGSDDKK-AKGADGK-a2-b2                   | TAU_HUMAN P10636-8 | TAU_HUMAN P10636-8 | xlink | ntra-protein > | 132     | 143     | 11      | 1919.953 | 480.996  | 4 | 5              | 31.82    |
| KDLSNVQSK-SKIGSTENLK-a1-b2                  | TAU_HUMAN P10636-8 | TAU_HUMAN P10636-8 | xlink | ntra-protein > | 281     | 259     | 22      | 2344.296 | 587.082  | 4 | 4.5            | 31.43    |
| VQSKIGSLDNITHVPGGGNK-KIETHK-a4-b1           | TAU_HUMAN P10636-8 | TAU_HUMAN P10636-8 | xlink | ntra-protein > | 353     | 370     | 17      | 2912.584 | 583.525  | 5 | 4.2            | 31.1     |
| AKTDHGAEIVYK-LDFKDR-a2-b4                   | TAU_HUMAN P10636-8 | TAU_HUMAN P10636-8 | xlink | ntra-protein > | 385     | 347     | 38      | 2261.178 | 566.302  | 4 | 3.9            | 30.85    |
| SKDGTGSDDKK-TKIATPR-a10-b2                  | TAU_HUMAN P10636-8 | TAU_HUMAN P10636-8 | xlink | ntra-protein > | 140     | 150     | 10      | 2060.085 | 687.703  | 3 | 4.9            | 30.84    |
| TPPKSPSSAKSR-KVAVVR-a10-b1                  | TAU_HUMAN P10636-8 | TAU_HUMAN P10636-8 | xlink | ntra-protein > | 240     | 225     | 15      | 2050.197 | 513.557  | 4 | 3.6            | 30.28    |
| IGSLDNITHVPGGGNKK-LDFKDR-a16-b4             | TAU_HUMAN P10636-8 | TAU_HUMAN P10636-8 | xlink | ntra-protein > | 369     | 347     | 22      | 2636.399 | 528.288  | 5 | 2.6            | 30.17    |
| TKIATPR-XVSKSK-a2-b4                        | TAU_HUMAN P10636-8 | TAU_HUMAN P10636-8 | xlink | ntra-protein > | 150     | 130     | 20      | 1617.919 | 540.314  | 3 | 4.3            | 30.13    |
| IGSLDNITHVPGGGNKK-SEKLDKDR-a16-b3           | TAU_HUMAN P10636-8 | TAU_HUMAN P10636-8 | xlink | ntra-protein > | 369     | 343     | 26      | 2980.576 | 746.152  | 4 | 4.7            | 30.09    |
| HQPGGGKQIINK-KDLSNVQSK-a7-b1                | TAU_HUMAN P10636-8 | TAU_HUMAN P10636-8 | xlink | ntra-protein > | 274     | 281     | 7       | 2643.478 | 882.167  | 3 | 2.8            | 29.9     |
| GAAPPGQKQANATR-IPAKTPPAPK-a8-b4             | TAU_HUMAN P10636-8 | TAU_HUMAN P10636-8 | xlink | ntra-protein > | 163     | 174     | 11      | 2579.43  | 645.865  | 4 | 4.6            | 29.82    |
| TPPKSPSSAKSR-KVAVVR-a10-b1                  | TAU_HUMAN P10636-8 | TAU_HUMAN P10636-8 | xlink | ntra-protein > | 240     | 225     | 15      | 2050.199 | 513.558  | 4 | 4.3            | 28.62    |
| SKDGTGSDDKK-IPAKTPPAPK-a10-b4               | TAU_HUMAN P10636-8 | TAU_HUMAN P10636-8 | xlink | ntra-protein > | 140     | 174     | 34      | 2293.224 | 765.416  | 3 | 3.4            | 28.6     |
| ESPLQTPTEGDGSEEPSETSDAKSTPTAEDVTAPLVDEGAPGK | TAU_HUMAN P10636-8 | TAU_HUMAN P10636-8 | xlink | ntra-protein > | 67      | 150     | 83      | 5249.534 | 1313.391 | 4 | 4.3            | 28.05    |
| DGTGSDDKK-GADGKTK-a8-b5                     | TAU_HUMAN P10636-8 | TAU_HUMAN P10636-8 | xlink | ntra-protein > | 140     | 148     | 8       | 1734.835 | 579.286  | 3 | 4.8            | 27.52    |
| HVPGGGVQVYKPVDSLK-KDLSNVQSK-a13-b1          | TAU_HUMAN P10636-8 | TAU_HUMAN P10636-8 | xlink | ntra-protein > | 311     | 281     | 30      | 3247.794 | 812.956  | 4 | 3.7            | 26.9     |
| IGSTENLKHQPGGGK-VQIINK-a8-b6                | TAU_HUMAN P10636-8 | TAU_HUMAN P10636-8 | xlink | ntra-protein > | 267     | 280     | 13      | 2501.409 | 626.36   | 4 | 5              | 26.77    |
| TPPKSPSSAK-KVAVVR-a4-b1                     | TAU_HUMAN P10636-8 | TAU_HUMAN P10636-8 | xlink | ntra-protein > | 234     | 225     | 9       | 1807.063 | 452.774  | 4 | 3.5            | 26.66    |
| DGTGSDDKK-TKIATPR-a8-b2                     | TAU_HUMAN P10636-8 | TAU_HUMAN P10636-8 | xlink | ntra-protein > | 140     | 150     | 10      | 2044.087 | 512.03   | 4 | 3.5            | 26.48    |
| SKDGTGSDDKK-GADGKTK-a10-b5                  | TAU_HUMAN P10636-8 | TAU_HUMAN P10636-8 | xlink | ntra-protein > | 140     | 148     | 8       | 1949.961 | 488.498  | 4 | 3.5            | 26.09    |
| GAAPPGQKQANATR-SKDGTGSDDKK-a8-b10           | TAU_HUMAN P10636-8 | TAU_HUMAN P10636-8 | xlink | ntra-protein > | 163     | 140     | 23      | 2697.345 | 900.123  | 3 | 4.7            | 25.97    |
| GAAPPGQKQANATR-TKIATPR-a8-b2                | TAU_HUMAN P10636-8 | TAU_HUMAN P10636-8 | xlink | ntra-protein > | 163     | 150     | 13      | 2346.287 | 783.104  | 3 | 4.5            | 25.82    |
| DGTGSDDKK-KVSKSK-a8-b4                      | TAU_HUMAN P10636-8 | TAU_HUMAN P10636-8 | xlink | ntra-protein > | 140     | 130     | 10      | 1952.981 | 489.253  | 4 | 4.3            | 25.22    |



Mr XL-MS Data

| id                                              | Protein1           | Protein2           | Type  | XLType           | AbsPos1 | AbsPos2 | deltaAA | Mr       | Mz       | z | Error_rel[ppm] | Id-Score |
|-------------------------------------------------|--------------------|--------------------|-------|------------------|---------|---------|---------|----------|----------|---|----------------|----------|
| TDHGAIEIVKSPVSGDTSR-ENAKAK-a10-b4               | TAU_HUMAN P10636-8 | TAU_HUMAN P10636-8 | xlink | intra-protein xl | 395     | 383     | 12      | 3011.526 | 603.313  | 5 | 2.1            | 44.8     |
| IGSLDNITHVPGGGNKK-IETHKLTFR-a16-b5              | TAU_HUMAN P10636-8 | TAU_HUMAN P10636-8 | xlink | intra-protein xl | 369     | 375     | 6       | 2987.63  | 747.915  | 4 | 3.5            | 44.11    |
| AKTDHGAIEVYK-IETHKLTFR-a2-b5                    | TAU_HUMAN P10636-8 | TAU_HUMAN P10636-8 | xlink | intra-protein xl | 385     | 375     | 10      | 2612.405 | 654.109  | 4 | 3.5            | 43.76    |
| LDLSNVQSKAGSK-VQIINKK-a9-b6                     | TAU_HUMAN P10636-8 | TAU_HUMAN P10636-8 | xlink | intra-protein xl | 290     | 280     | 10      | 2325.333 | 582.341  | 4 | 2.8            | 42.56    |
| IPAKTPAPK-TKIATPR-a4-b2                         | TAU_HUMAN P10636-8 | TAU_HUMAN P10636-8 | xlink | intra-protein xl | 174     | 150     | 24      | 1942.165 | 486.549  | 4 | 1.8            | 39.78    |
| IGSLDNITHVPGGGNKK-AKTDHGAIEVYK-a16-b2           | TAU_HUMAN P10636-8 | TAU_HUMAN P10636-8 | xlink | intra-protein xl | 369     | 385     | 16      | 3174.676 | 794.677  | 4 | 2.8            | 39.35    |
| AKGADGK-TKIATPR-a2-b2                           | TAU_HUMAN P10636-8 | TAU_HUMAN P10636-8 | xlink | intra-protein xl | 143     | 150     | 7       | 1568.891 | 523.971  | 3 | 1.3            | 37.95    |
| IPAKTPAPK-TKIATPR-a4-b2                         | TAU_HUMAN P10636-8 | TAU_HUMAN P10636-8 | xlink | intra-protein xl | 174     | 150     | 24      | 1942.167 | 486.549  | 4 | 2.6            | 37.35    |
| AGSLGNIIHKPGGGQVEK-SEKLDKDFKDR-a10-b3           | TAU_HUMAN P10636-8 | TAU_HUMAN P10636-8 | xlink | intra-protein xl | 331     | 343     | 12      | 3158.654 | 632.739  | 5 | 2.3            | 37.34    |
| AKTDHGAIEVYK-IETHKLTFR-a2-b5                    | TAU_HUMAN P10636-8 | TAU_HUMAN P10636-8 | xlink | intra-protein xl | 385     | 375     | 10      | 2612.402 | 654.108  | 4 | 2.3            | 35.62    |
| KDLSNVQSK-SKIGSTENLK-a1-b2                      | TAU_HUMAN P10636-8 | TAU_HUMAN P10636-8 | xlink | intra-protein xl | 281     | 259     | 22      | 2344.293 | 587.081  | 4 | 3.4            | 34.51    |
| HVPGGGSQIVYKPVVLSK-KDLSNVQSK-a13-b1             | TAU_HUMAN P10636-8 | TAU_HUMAN P10636-8 | xlink | intra-protein xl | 311     | 281     | 30      | 3247.792 | 812.956  | 4 | 3.2            | 34.32    |
| AKGADGK-TKIATPR-a2-b2                           | TAU_HUMAN P10636-8 | TAU_HUMAN P10636-8 | xlink | intra-protein xl | 143     | 150     | 7       | 1568.892 | 523.972  | 3 | 2              | 34.2     |
| KDLSNVQSK-AGSKDNK-a1-b4                         | TAU_HUMAN P10636-8 | TAU_HUMAN P10636-8 | xlink | intra-protein xl | 281     | 294     | 13      | 2100.149 | 701.057  | 3 | 2.9            | 33.36    |
| AGSLGNIIHKPGGGQVEK-HVPGGGSQIVYKPVVLSK-a10-b13   | TAU_HUMAN P10636-8 | TAU_HUMAN P10636-8 | xlink | intra-protein xl | 331     | 311     | 20      | 4001.161 | 801.24   | 5 | 3              | 32.15    |
| TPKSPSSAK-KVAVVR-a4-b1                          | TAU_HUMAN P10636-8 | TAU_HUMAN P10636-8 | xlink | intra-protein xl | 234     | 225     | 9       | 1807.06  | 452.773  | 4 | 1.7            | 31.88    |
| GAAPPQKQGANATR-TKIATPR-a8-b2                    | TAU_HUMAN P10636-8 | TAU_HUMAN P10636-8 | xlink | intra-protein xl | 163     | 150     | 13      | 2346.28  | 587.578  | 4 | 1.2            | 31.51    |
| VQSKIGSLDNITHVPGGGNKK-LDFKDR-a4-b4              | TAU_HUMAN P10636-8 | TAU_HUMAN P10636-8 | xlink | intra-protein xl | 353     | 347     | 6       | 2950.562 | 738.648  | 4 | 3.8            | 30.41    |
| DNKIHVPGGGSQIVYKPVVLSK-LDLSNVQSKAGSK-a4-b9      | TAU_HUMAN P10636-8 | TAU_HUMAN P10636-8 | xlink | intra-protein xl | 298     | 290     | 8       | 3933.131 | 787.634  | 5 | 2.6            | 30.29    |
| GAAPPQKQGANATR-TKIATPR-a8-b2                    | TAU_HUMAN P10636-8 | TAU_HUMAN P10636-8 | xlink | intra-protein xl | 163     | 150     | 13      | 2346.285 | 587.579  | 4 | 3.6            | 30.2     |
| TDHGAIEVYKSPVSGDTSR-LDFKDR-a10-b4               | TAU_HUMAN P10636-8 | TAU_HUMAN P10636-8 | xlink | intra-protein xl | 395     | 347     | 48      | 3144.582 | 787.153  | 4 | 2.9            | 29.63    |
| VQSKIGSLDNITHVPGGGNKK-AGSLGNIIHKPGGGQVEK-a4-b10 | TAU_HUMAN P10636-8 | TAU_HUMAN P10636-8 | xlink | intra-protein xl | 353     | 331     | 22      | 4042.146 | 1011.544 | 4 | 2.8            | 28.7     |
| HVPGGGSQIVYKPVVLSK-SKIGSTENLK-a13-b2            | TAU_HUMAN P10636-8 | TAU_HUMAN P10636-8 | xlink | intra-protein xl | 311     | 259     | 52      | 3192.749 | 799.195  | 4 | 2.9            | 28.45    |
| TDHGAIEVYKSPVSGDTSR-ENAKAK-a10-b4               | TAU_HUMAN P10636-8 | TAU_HUMAN P10636-8 | xlink | intra-protein xl | 395     | 383     | 12      | 3011.53  | 603.314  | 5 | 3.3            | 27.63    |
| IGSLDNITHVPGGGNKK-IETHKLTFR-a16-b5              | TAU_HUMAN P10636-8 | TAU_HUMAN P10636-8 | xlink | intra-protein xl | 369     | 375     | 6       | 2987.627 | 747.915  | 4 | 2.6            | 26.31    |

## Control1 XL-MS Data

| Id                                     | Protein1           | Protein2           | Type  | XLType           | AbsPos1 | AbsPos2 | deltaAA | Mr       | Mz       | z | Error_rel[ppm] | ld-Score |
|----------------------------------------|--------------------|--------------------|-------|------------------|---------|---------|---------|----------|----------|---|----------------|----------|
| GAAPPGQKQANATR-TKIATPR-a8-b2           | TAU_HUMAN P10636-8 | TAU_HUMAN P10636-8 | xlink | intra-protein xl | 163     | 150     | 13      | 2346.281 | 783.101  | 3 | 1.8            | 23.18    |
| TPSLPTPTREPCK-TKIATPR-a13-b2           | TAU_HUMAN P10636-8 | TAU_HUMAN P10636-8 | xlink | intra-protein xl | 224     | 150     | 74      | 2471.411 | 618.86   | 4 | -0.2           | 11.94    |
| CGSLGNIHHKPGGGQVEVKSEK-CGSKDNIX-a19-b4 | TAU_HUMAN P10636-8 | TAU_HUMAN P10636-8 | xlink | intra-protein xl | 340     | 294     | 46      | 3489.717 | 873.437  | 4 | 2.2            | 10.85    |
| AKTDHGAEIVYK-MVSKSK-a2-b4              | TAU_HUMAN P10636-8 | TAU_HUMAN P10636-8 | xlink | intra-protein xl | 385     | 130     | 255     | 2147.124 | 716.716  | 3 | -2.8           | 9.39     |
| IGSLDNITHVPGGGNKK-SKIGSTENLX-a16-b2    | TAU_HUMAN P10636-8 | TAU_HUMAN P10636-8 | xlink | intra-protein xl | 369     | 259     | 110     | 3033.611 | 1012.212 | 3 | 0.5            | 7.13     |

## Control2 XL-MS Data

| Id                                             | Protein1           | Protein2           | Type  | XLType           | AbsPos1 | AbsPos2 | deltaAA | Mr       | Mz      | z | Error_rel[ppm] | Id-Score |
|------------------------------------------------|--------------------|--------------------|-------|------------------|---------|---------|---------|----------|---------|---|----------------|----------|
| SEKLDLK-KVAVVR-a3-b1                           | TAU_HUMAN P10636-8 | TAU_HUMAN P10636-8 | xlink | intra-protein xl | 343     | 225     | 118     | 1673.972 | 558.999 | 3 | 0.3            | 15.16    |
| LTFRENAKAX-SEKLDLFXDR-a8-b3                    | TAU_HUMAN P10636-8 | TAU_HUMAN P10636-8 | xlink | intra-protein xl | 383     | 343     | 40      | 2679.409 | 670.86  | 4 | 4              | 9.85     |
| IPAKTPPAPK-TKIATPR-a4-b2                       | TAU_HUMAN P10636-8 | TAU_HUMAN P10636-8 | xlink | intra-protein xl | 174     | 150     | 24      | 1942.156 | 648.393 | 3 | -2.7           | 8.99     |
| TPPAPXTPPSSGPEPKSGDR-IGSLDNITHVPGGGNKK-a16-b16 | TAU_HUMAN P10636-8 | TAU_HUMAN P10636-8 | xlink | intra-protein xl | 190     | 369     | 179     | 3960.039 | 991.018 | 4 | 1.2            | 8.05     |
| IETHKLTFR-AKGADGX-a5-b2                        | TAU_HUMAN P10636-8 | TAU_HUMAN P10636-8 | xlink | intra-protein xl | 375     | 143     | 232     | 2041.086 | 681.37  | 3 | -5             | 7.29     |

### Control3 XL-MS Data

| Id                                 | Protein1           | Protein2           | Type  | XLType        | AbsPos1 | AbsPos2 | deltaAA | Mr       | Mz       | z | Error_rel[ppm] | ld-Score |
|------------------------------------|--------------------|--------------------|-------|---------------|---------|---------|---------|----------|----------|---|----------------|----------|
| GAAPPGQKQGANATR-TKIATPR-a8-b2      | TAU_HUMAN P10636-8 | TAU_HUMAN P10636-8 | xlink | intra-protein | 163     | 150     | 13      | 2346.279 | 783.101  | 3 | 0.8            | 13.51    |
| SPSSAKSRLQTAPVPMPLK-KAKGADGK-a6-b3 | TAU_HUMAN P10636-8 | TAU_HUMAN P10636-8 | xlink | intra-protein | 240     | 143     | 97      | 3020.641 | 605.136  | 5 | 2.7            | 11.95    |
| DGTGSDDKKAK-KVAVVR-a9-b1           | TAU_HUMAN P10636-8 | TAU_HUMAN P10636-8 | xlink | intra-protein | 141     | 225     | 84      | 1929.056 | 644.026  | 3 | 1.3            | 11.75    |
| CGSKDNIK-SPSSAKSR-a4-b6            | TAU_HUMAN P10636-8 | TAU_HUMAN P10636-8 | xlink | intra-protein | 294     | 240     | 54      | 1876.928 | 626.651  | 3 | -1.7           | 11.49    |
| TPPAPKTPSSGEPX-HQPGGGKVIINK-a6-b7  | TAU_HUMAN P10636-8 | TAU_HUMAN P10636-8 | xlink | intra-protein | 180     | 274     | 94      | 3213.702 | 1072.242 | 3 | -4             | 9.08     |
| SKDGTGSDDKK-SEKLDKDR-a10-b3        | TAU_HUMAN P10636-8 | TAU_HUMAN P10636-8 | xlink | intra-protein | 140     | 343     | 203     | 2411.182 | 603.803  | 4 | 0.1            | 8.39     |
| SKDGTGSDDKK-SEKLDKDR-a2-b3         | TAU_HUMAN P10636-8 | TAU_HUMAN P10636-8 | xlink | intra-protein | 132     | 343     | 211     | 2411.184 | 603.804  | 4 | 1              | 7.43     |

## AD1 XL-MS Data

| Id                                 | Protein1           | Protein2           | Type  | XLType         | AbsPos1 | AbsPos2 | deltaAA | Mr       | Mz       | z | Error_rel[ppm] | Id-Score |
|------------------------------------|--------------------|--------------------|-------|----------------|---------|---------|---------|----------|----------|---|----------------|----------|
| GAAPPGQKGOANATR-IPAKTPPAPK-a8-b4   | TAU_HUMAN P10636-8 | TAU_HUMAN P10636-8 | xlink | ntra-protein > | 163     | 174     | 11      | 2579.42  | 645.863  | 4 | 0.8            | 20.56    |
| LTFRENAKAK-EPXKVAVVR-a8-b4         | TAU_HUMAN P10636-8 | TAU_HUMAN P10636-8 | xlink | ntra-protein > | 383     | 225     | 158     | 2453.415 | 614.362  | 4 | 1.2            | 14.55    |
| CGSKDNIK-ENAKAX-a4-b4              | TAU_HUMAN P10636-8 | TAU_HUMAN P10636-8 | xlink | ntra-protein > | 294     | 383     | 89      | 1831.908 | 458.985  | 4 | -1.1           | 14.08    |
| AKGADGK-SEKLDFK-a2-b3              | TAU_HUMAN P10636-8 | TAU_HUMAN P10636-8 | xlink | ntra-protein > | 143     | 343     | 200     | 1648.871 | 550.632  | 3 | 2.6            | 10.23    |
| GAAPPGQKGOANATR-SPSSAKSR-a8-b6     | TAU_HUMAN P10636-8 | TAU_HUMAN P10636-8 | xlink | ntra-protein > | 163     | 240     | 77      | 2379.218 | 595.812  | 4 | -3.1           | 9.07     |
| AKGADGKTK-KIETHX-a7-b1             | TAU_HUMAN P10636-8 | TAU_HUMAN P10636-8 | xlink | ntra-protein > | 148     | 370     | 222     | 1881.033 | 628.019  | 3 | 0.7            | 8.48     |
| DGTGSDDKX-KIETHX-a8-b1             | TAU_HUMAN P10636-8 | TAU_HUMAN P10636-8 | xlink | ntra-protein > | 140     | 370     | 230     | 2041.987 | 681.67   | 3 | -2.4           | 8.28     |
| SKIGSTENLX-TKIATPR-a2-b2           | TAU_HUMAN P10636-8 | TAU_HUMAN P10636-8 | xlink | ntra-protein > | 259     | 150     | 109     | 2113.166 | 705.396  | 3 | -4             | 8.02     |
| GADGKTKIATPR-SEKLDFKDR-a5-b3       | TAU_HUMAN P10636-8 | TAU_HUMAN P10636-8 | xlink | ntra-protein > | 148     | 343     | 195     | 2488.329 | 623.09   | 4 | 0.4            | 8.01     |
| LQTAPVPMPLKKNVSK-SKDGTSDDKX-a15-b2 | TAU_HUMAN P10636-8 | TAU_HUMAN P10636-8 | xlink | ntra-protein > | 257     | 132     | 125     | 3253.7   | 1085.574 | 3 | 4              | 7.26     |
| IETHKLTR-AGGADGX-a5-b2             | TAU_HUMAN P10636-8 | TAU_HUMAN P10636-8 | xlink | ntra-protein > | 375     | 143     | 232     | 2041.088 | 681.37   | 3 | -4             | 7.14     |



## AD2 XL-MS Data

| Id                                      | Protein1           | Protein2           | Type  | XLType         | AbsPos1 | AbsPos2 | deltaAA | Mr       | Mz      | z | Error_rel[ppm] | Id-Score |
|-----------------------------------------|--------------------|--------------------|-------|----------------|---------|---------|---------|----------|---------|---|----------------|----------|
| SEKLDLFK-KVAVVR-a3-b1                   | TAU_HUMAN P10636-8 | TAU_HUMAN P10636-8 | xlink | ntra-protein › | 343     | 225     | 118     | 1673.972 | 558.999 | 3 | 0.4            | 13.67    |
| KLDLSNVQSK-SPSSAKSR-a1-b6               | TAU_HUMAN P10636-8 | TAU_HUMAN P10636-8 | xlink | ntra-protein › | 281     | 240     | 41      | 2087.127 | 696.717 | 3 | 2.2            | 12.28    |
| IETHKLTFR-AKGADGX-a5-b2                 | TAU_HUMAN P10636-8 | TAU_HUMAN P10636-8 | xlink | ntra-protein › | 375     | 143     | 232     | 2041.088 | 681.371 | 3 | -3.6           | 9.9      |
| NVKSIGSTENLX-SPSSAKSR-a5-b6             | TAU_HUMAN P10636-8 | TAU_HUMAN P10636-8 | xlink | ntra-protein › | 259     | 240     | 19      | 2487.328 | 622.84  | 4 | -0.5           | 9.49     |
| IGSLDNITHVPGGGNKX-TPPSSGEPKSGDR-a16-b10 | TAU_HUMAN P10636-8 | TAU_HUMAN P10636-8 | xlink | ntra-protein › | 369     | 190     | 179     | 3368.695 | 843.182 | 4 | -0.3           | 8.92     |
| IGSTENLKHQPGGGKVQIINX-LTFRENAKAX-a15-b8 | TAU_HUMAN P10636-8 | TAU_HUMAN P10636-8 | xlink | ntra-protein › | 274     | 383     | 109     | 3760.031 | 941.015 | 4 | -2.1           | 8.59     |
| GADGKTKIATPR-VQIINKK-a7-b6              | TAU_HUMAN P10636-8 | TAU_HUMAN P10636-8 | xlink | ntra-protein › | 150     | 280     | 130     | 2193.278 | 732.1   | 3 | -3.2           | 7.7      |
| SKDGTGSDDKX-LDFKDRVQSX-a10-b4           | TAU_HUMAN P10636-8 | TAU_HUMAN P10636-8 | xlink | ntra-protein › | 140     | 347     | 207     | 2737.345 | 913.456 | 3 | -2.6           | 7.63     |
| SRLQTAPVPMPLKX-SKDGTGSDDKX-a14-b10      | TAU_HUMAN P10636-8 | TAU_HUMAN P10636-8 | xlink | ntra-protein › | 254     | 140     | 114     | 3281.68  | 821.428 | 4 | -4             | 7.05     |
| SRLQTAPVPMPLKX-SKDGTGSDDKX-a14-b2       | TAU_HUMAN P10636-8 | TAU_HUMAN P10636-8 | xlink | ntra-protein › | 254     | 132     | 122     | 3281.677 | 821.427 | 4 | -4.6           | 7.03     |

## AD3 XL-MS Data

| Id                                               | Protein1           | Protein2           | Type  | XLType         | AbsPos1 | AbsPos2 | deltaAA | Mr       | Mz       | z | Error_rel[ppm] | Id-Score |
|--------------------------------------------------|--------------------|--------------------|-------|----------------|---------|---------|---------|----------|----------|---|----------------|----------|
| GQANATRIPAKTPPAPK-KAKGADGK-a11-b3                | TAU_HUMAN P10636-8 | TAU_HUMAN P10636-8 | xlink | ntra-protein > | 174     | 143     | 31      | 2628.463 | 877.162  | 3 | -2.9           | 11.1     |
| SEKLDK-KVAVVR-a3-b1                              | TAU_HUMAN P10636-8 | TAU_HUMAN P10636-8 | xlink | ntra-protein > | 343     | 225     | 118     | 1673.971 | 558.998  | 3 | -0.1           | 9.73     |
| AKTDHGAEIVYK-KIETHK-a2-b1                        | TAU_HUMAN P10636-8 | TAU_HUMAN P10636-8 | xlink | ntra-protein > | 385     | 370     | 15      | 2223.196 | 742.073  | 3 | 2.9            | 9.47     |
| TKIATPRGAAPPQX-SKDGTSDDK-a2-b2                   | TAU_HUMAN P10636-8 | TAU_HUMAN P10636-8 | xlink | ntra-protein > | 150     | 132     | 18      | 2880.49  | 961.171  | 3 | -1.3           | 8.88     |
| EPXKVAVVR-GADGKTX-a4-b5                          | TAU_HUMAN P10636-8 | TAU_HUMAN P10636-8 | xlink | ntra-protein > | 225     | 148     | 77      | 2066.156 | 689.727  | 3 | 3.8            | 8.07     |
| TPPKSPSSAX-KAKGADGX-a4-b1                        | TAU_HUMAN P10636-8 | TAU_HUMAN P10636-8 | xlink | ntra-protein > | 234     | 141     | 93      | 2138.126 | 713.717  | 3 | -3.2           | 7.89     |
| SPSSAKSRLQATVPMPDLK-KAKGADGK-a6-b3               | TAU_HUMAN P10636-8 | TAU_HUMAN P10636-8 | xlink | ntra-protein > | 240     | 143     | 97      | 3020.646 | 756.169  | 4 | 4.2            | 7.7      |
| DRVQSKIGSLDNITHVPGGGNK-SKIGSTENLKHQPGGGK-a6-b10  | TAU_HUMAN P10636-8 | TAU_HUMAN P10636-8 | xlink | ntra-protein > | 353     | 267     | 86      | 4166.169 | 1042.55  | 4 | -3.3           | 7.57     |
| KLDLSNVQSKCGSX-AKGADGKTK-a10-b7                  | TAU_HUMAN P10636-8 | TAU_HUMAN P10636-8 | xlink | ntra-protein > | 290     | 148     | 142     | 2689.407 | 897.477  | 3 | -0.1           | 7.52     |
| KDQGGYTMHQDQEGDTDAGLK-VQSKIGSLDNITHVPGGGNK-a1-b4 | TAU_HUMAN P10636-8 | TAU_HUMAN P10636-8 | xlink | ntra-protein > | 24      | 353     | 329     | 4451.124 | 1113.789 | 4 | -1.2           | 7.35     |
| TPPKSPSSAXSR-CGSKDNIK-a4-b4                      | TAU_HUMAN P10636-8 | TAU_HUMAN P10636-8 | xlink | ntra-protein > | 234     | 294     | 60      | 2414.217 | 805.747  | 3 | -2.2           | 7.34     |
| KLDLSNVQSKCGSK-TKIATPR-a1-b2                     | TAU_HUMAN P10636-8 | TAU_HUMAN P10636-8 | xlink | ntra-protein > | 281     | 150     | 131     | 2486.346 | 829.79   | 3 | -2.7           | 7.3      |
| SKIGSTENLK-SEKLDKDR-a2-b7                        | TAU_HUMAN P10636-8 | TAU_HUMAN P10636-8 | xlink | ntra-protein > | 259     | 347     | 88      | 2350.243 | 784.422  | 3 | 2.2            | 7        |

## Dounce Homogenization XL-MS Data

| Id                       | Protein1           | Protein2           | Type  | XLType           | AbsPos1 | AbsPos2 | deltaAA | Mr       | Mz      | z | Error_rel[ppm] | Id-Score |
|--------------------------|--------------------|--------------------|-------|------------------|---------|---------|---------|----------|---------|---|----------------|----------|
| GADGKTX-ENAKAX-a5-b4     | TAU_HUMAN P10636-8 | TAU_HUMAN P10636-8 | xlink | intra-protein xl | 148     | 383     | 235     | 1700.872 | 567.965 | 3 | 1.5            | 10.92    |
| DGTGSDDKX-KIETHX-a8-b1   | TAU_HUMAN P10636-8 | TAU_HUMAN P10636-8 | xlink | intra-protein xl | 140     | 370     | 230     | 2041.988 | 681.67  | 3 | -2.1           | 10.39    |
| SKIGSTENLX-TKIATPR-a2-b2 | TAU_HUMAN P10636-8 | TAU_HUMAN P10636-8 | xlink | intra-protein xl | 259     | 150     | 109     | 2113.165 | 705.396 | 3 | -4.6           | 8.05     |

## Mechanical Homogenization XL-MS Data

| Id                                                    | Protein1           | Protein2           | Type  | XLType           | AbsPos1 | AbsPos2 | deltaAA | Mr       | Mz       | z | Error_rel[ppm] | Id-Score |
|-------------------------------------------------------|--------------------|--------------------|-------|------------------|---------|---------|---------|----------|----------|---|----------------|----------|
| VQSKIGSLDNITHVPGGGNK-SEKLDKDR-a4-b3                   | TAU_HUMAN P10636-8 | TAU_HUMAN P10636-8 | xlink | intra-protein xl | 353     | 343     | 10      | 3294.726 | 824.689  | 4 | 1.5            | 44.99    |
| HQPGGGKVQIINK-KLDSLNVQSK-a7-b1                        | TAU_HUMAN P10636-8 | TAU_HUMAN P10636-8 | xlink | intra-protein xl | 274     | 281     | 7       | 2643.47  | 529.702  | 5 | -0.4           | 41.49    |
| VQSKIGSLDNITHVPGGGNK-VQIINKK-a4-b6                    | TAU_HUMAN P10636-8 | TAU_HUMAN P10636-8 | xlink | intra-protein xl | 353     | 280     | 73      | 2999.684 | 1000.902 | 3 | 2.3            | 40.96    |
| VTSKCGSLGNIIHHPGGGQVEVK-KLDSLNVQSK-a4-b1              | TAU_HUMAN P10636-8 | TAU_HUMAN P10636-8 | xlink | intra-protein xl | 321     | 281     | 40      | 3656.922 | 1219.982 | 3 | -2.3           | 40.46    |
| IGSLDNITHVPGGGNK-LDFKDR-a16-b4                        | TAU_HUMAN P10636-8 | TAU_HUMAN P10636-8 | xlink | intra-protein xl | 369     | 347     | 22      | 2636.398 | 660.107  | 4 | 2.2            | 39.99    |
| VTSKCGSLGNIIHHPGGGQVEVK-SEKLDK-a4-b3                  | TAU_HUMAN P10636-8 | TAU_HUMAN P10636-8 | xlink | intra-protein xl | 321     | 343     | 22      | 3391.757 | 679.359  | 5 | 0.3            | 39.92    |
| KLDSLNVQSK-SKIGSTENLK-a1-b2                           | TAU_HUMAN P10636-8 | TAU_HUMAN P10636-8 | xlink | intra-protein xl | 281     | 259     | 22      | 2344.288 | 782.437  | 3 | 1.3            | 39.69    |
| IGSTENLKHQPGGGK-KLDSLNVQSK-a8-b1                      | TAU_HUMAN P10636-8 | TAU_HUMAN P10636-8 | xlink | intra-protein xl | 267     | 281     | 14      | 2790.485 | 931.169  | 3 | -1             | 39.44    |
| IGSLDNITHVPGGGNK-SEKLDKDR-a16-b3                      | TAU_HUMAN P10636-8 | TAU_HUMAN P10636-8 | xlink | intra-protein xl | 369     | 343     | 26      | 2980.565 | 746.149  | 4 | 1              | 39.26    |
| DNIKHVPGGGSVQIVYKPVDSLK-VQIINKK-a4-b6                 | TAU_HUMAN P10636-8 | TAU_HUMAN P10636-8 | xlink | intra-protein xl | 298     | 280     | 18      | 3428.937 | 572.497  | 6 | -0.9           | 38.63    |
| LDLSNVQSKCGSK-SKIGSTENLK-a9-b2                        | TAU_HUMAN P10636-8 | TAU_HUMAN P10636-8 | xlink | intra-protein xl | 290     | 259     | 31      | 2648.372 | 883.799  | 3 | 1.2            | 38.54    |
| VQSKIGSLDNITHVPGGGNK-SKIGSTENLK-a4-b2                 | TAU_HUMAN P10636-8 | TAU_HUMAN P10636-8 | xlink | intra-protein xl | 353     | 259     | 94      | 3233.727 | 1078.917 | 3 | 0.6            | 38.53    |
| LDLSNVQSKCGSK-VQIINKK-a9-b6                           | TAU_HUMAN P10636-8 | TAU_HUMAN P10636-8 | xlink | intra-protein xl | 290     | 280     | 10      | 2414.319 | 604.588  | 4 | -0.4           | 37.82    |
| DNIKHVPGGGSVQIVYKPVDSLK-KLDSLNVQSK-a4-b1              | TAU_HUMAN P10636-8 | TAU_HUMAN P10636-8 | xlink | intra-protein xl | 298     | 281     | 17      | 3718.026 | 620.679  | 6 | -1.1           | 37.54    |
| KLDSLNVQSK-LDFKDR-a1-b4                               | TAU_HUMAN P10636-8 | TAU_HUMAN P10636-8 | xlink | intra-protein xl | 281     | 347     | 66      | 2061.112 | 688.045  | 3 | 0.6            | 37.04    |
| VQIINKK-LDFKDR-a6-b4                                  | TAU_HUMAN P10636-8 | TAU_HUMAN P10636-8 | xlink | intra-protein xl | 280     | 347     | 67      | 1772.017 | 444.012  | 4 | -1.5           | 36.8     |
| HVPGGGSVQIVYKPVDSLK-SEKLDK-a13-b3                     | TAU_HUMAN P10636-8 | TAU_HUMAN P10636-8 | xlink | intra-protein xl | 311     | 343     | 32      | 2982.609 | 746.66   | 4 | 0.8            | 36.29    |
| VQSKIGSLDNITHVPGGGNK-LDFKDR-a4-b4                     | TAU_HUMAN P10636-8 | TAU_HUMAN P10636-8 | xlink | intra-protein xl | 353     | 347     | 6       | 2950.557 | 738.647  | 4 | 1.9            | 36.04    |
| VTSKCGSLGNIIHHPGGGQVEVK-LDFKDR-a4-b4                  | TAU_HUMAN P10636-8 | TAU_HUMAN P10636-8 | xlink | intra-protein xl | 321     | 347     | 26      | 3318.714 | 664.751  | 5 | -0.1           | 35.76    |
| SKIGSTENLK-VQIINKK-a2-b6                              | TAU_HUMAN P10636-8 | TAU_HUMAN P10636-8 | xlink | intra-protein xl | 259     | 280     | 21      | 2055.194 | 514.806  | 4 | -0.2           | 34.96    |
| IGSLDNITHVPGGGNK-KLDSLNVQSK-a16-b1                    | TAU_HUMAN P10636-8 | TAU_HUMAN P10636-8 | xlink | intra-protein xl | 369     | 281     | 88      | 2974.609 | 595.93   | 5 | 0.2            | 33.69    |
| DNIKHVPGGGSVQIVYKPVDSLK-LDSLNVQSKCGSK-a4-b9           | TAU_HUMAN P10636-8 | TAU_HUMAN P10636-8 | xlink | intra-protein xl | 298     | 290     | 8       | 4022.12  | 1006.538 | 4 | 1.3            | 32.07    |
| HVPGGGSVQIVYKPVDSLK-SKIGSTENLK-a13-b2                 | TAU_HUMAN P10636-8 | TAU_HUMAN P10636-8 | xlink | intra-protein xl | 311     | 259     | 52      | 3192.744 | 799.194  | 4 | 1.3            | 31.17    |
| HVPGGGSVQIVYKPVDSLK-VQIINKK-a13-b6                    | TAU_HUMAN P10636-8 | TAU_HUMAN P10636-8 | xlink | intra-protein xl | 311     | 280     | 31      | 2958.688 | 592.745  | 5 | -0.9           | 31.16    |
| VTSKCGSLGNIIHHPGGGQVEVK-VQSKIGSLDNITHVPGGGNK-a4-b4    | TAU_HUMAN P10636-8 | TAU_HUMAN P10636-8 | xlink | intra-protein xl | 321     | 353     | 32      | 4546.36  | 1137.598 | 4 | -2.4           | 30.73    |
| HVPGGGSVQIVYKPVDSLK-KLDSLNVQSK-a13-b1                 | TAU_HUMAN P10636-8 | TAU_HUMAN P10636-8 | xlink | intra-protein xl | 311     | 281     | 30      | 3247.787 | 812.954  | 4 | 1.5            | 30.46    |
| IGSLDNITHVPGGGNK-VQIINKK-a16-b6                       | TAU_HUMAN P10636-8 | TAU_HUMAN P10636-8 | xlink | intra-protein xl | 369     | 280     | 89      | 2685.514 | 538.111  | 5 | -1.5           | 29.47    |
| DNIKHVPGGGSVQIVYKPVDSLK-SKIGSTENLK-a4-b2              | TAU_HUMAN P10636-8 | TAU_HUMAN P10636-8 | xlink | intra-protein xl | 298     | 259     | 39      | 3662.989 | 1222.004 | 3 | 0.2            | 28.37    |
| DNIKHVPGGGSVQIVYKPVDSLK-SEKLDK-a4-b3                  | TAU_HUMAN P10636-8 | TAU_HUMAN P10636-8 | xlink | intra-protein xl | 298     | 343     | 45      | 3452.857 | 864.222  | 4 | 0.5            | 27.78    |
| VQSKIGSLDNITHVPGGGNK-LDSLNVQSKCGSK-a4-b9              | TAU_HUMAN P10636-8 | TAU_HUMAN P10636-8 | xlink | intra-protein xl | 353     | 290     | 63      | 3592.846 | 1198.623 | 3 | -1.5           | 26.51    |
| HVPGGGSVQIVYKPVDSLK-LDSLNVQSKCGSK-a13-b9              | TAU_HUMAN P10636-8 | TAU_HUMAN P10636-8 | xlink | intra-protein xl | 311     | 290     | 21      | 3551.869 | 888.975  | 4 | 0.9            | 26.46    |
| VQSKIGSLDNITHVPGGGNK-HVPGGGSVQIVYKPVDSLK-a4-b13       | TAU_HUMAN P10636-8 | TAU_HUMAN P10636-8 | xlink | intra-protein xl | 353     | 311     | 42      | 4137.225 | 690.545  | 6 | 0.6            | 26.33    |
| HVPGGGSVQIVYKPVDSLK-VTSK-SEKLDK-a19-b4                | TAU_HUMAN P10636-8 | TAU_HUMAN P10636-8 | xlink | intra-protein xl | 317     | 347     | 30      | 3324.813 | 665.97   | 5 | 1.4            | 26.12    |
| HQPGGGKVQIINK-SKIGSTENLK-a7-b2                        | TAU_HUMAN P10636-8 | TAU_HUMAN P10636-8 | xlink | intra-protein xl | 274     | 259     | 15      | 2588.429 | 648.115  | 4 | 0.1            | 25.97    |
| HQPGGGKVQIINK-SEKLDK-a7-b3                            | TAU_HUMAN P10636-8 | TAU_HUMAN P10636-8 | xlink | intra-protein xl | 274     | 343     | 69      | 2378.297 | 793.774  | 3 | 0.6            | 25.62    |
| HVPGGGSVQIVYKPVDSLK-VTSK-SEKLDK-a19-b3                | TAU_HUMAN P10636-8 | TAU_HUMAN P10636-8 | xlink | intra-protein xl | 317     | 343     | 26      | 3397.851 | 680.578  | 5 | 0.4            | 23.85    |
| VQSKIGSLDNITHVPGGGNK-HQPGGGKVQIINK-a4-b7              | TAU_HUMAN P10636-8 | TAU_HUMAN P10636-8 | xlink | intra-protein xl | 353     | 274     | 79      | 3532.912 | 884.236  | 4 | 0.1            | 20.45    |
| CGSLGNIIHHPGGGQVEVK-SEKLDK-a10-b7                     | TAU_HUMAN P10636-8 | TAU_HUMAN P10636-8 | xlink | intra-protein xl | 331     | 347     | 16      | 3247.644 | 812.919  | 4 | 0.8            | 19.62    |
| VTSKCGSLGNIIHHPGGGQVEVK-HVPGGGSVQIVYKPVDSLK-a4-b13    | TAU_HUMAN P10636-8 | TAU_HUMAN P10636-8 | xlink | intra-protein xl | 321     | 311     | 10      | 4505.405 | 902.089  | 5 | 4.3            | 19.37    |
| DNIKHVPGGGSVQIVYKPVDSLK-VTSKCGSLGNIIHHPGGGQVEVK-a4-b4 | TAU_HUMAN P10636-8 | TAU_HUMAN P10636-8 | xlink | intra-protein xl | 298     | 321     | 23      | 4975.638 | 830.281  | 6 | 0.8            | 18.29    |
| HVPGGGSVQIVYKPVDSLK-IGSLDNITHVPGGGNK-a13-b16          | TAU_HUMAN P10636-8 | TAU_HUMAN P10636-8 | xlink | intra-protein xl | 311     | 369     | 58      | 3823.072 | 1275.365 | 3 | 2.2            | 17.1     |
| HVPGGGSVQIVYKPVDSLK-VTSK-KLDSLNVQSK-a19-b1            | TAU_HUMAN P10636-8 | TAU_HUMAN P10636-8 | xlink | intra-protein xl | 317     | 281     | 36      | 3663.029 | 733.614  | 5 | 1.1            | 16.89    |
| DNIKHVPGGGSVQIVYKPVDSLK-IGSTENLKHQPGGGK-a4-b8         | TAU_HUMAN P10636-8 | TAU_HUMAN P10636-8 | xlink | intra-protein xl | 298     | 267     | 31      | 4109.194 | 822.847  | 5 | 0.8            | 16.16    |
| LDLSNVQSKCGSKDNIIK-TKIATPR-a9-b2                      | TAU_HUMAN P10636-8 | TAU_HUMAN P10636-8 | xlink | intra-protein xl | 290     | 150     | 140     | 2828.497 | 566.707  | 5 | -3.5           | 15.32    |
| HVPGGGSVQIVYKPVDSLK-IGSTENLKHQPGGGK-a13-b8            | TAU_HUMAN P10636-8 | TAU_HUMAN P10636-8 | xlink | intra-protein xl | 311     | 267     | 44      | 3638.949 | 1213.991 | 3 | 1.8            | 15.02    |
| DNIKHVPGGGSVQIVYKPVDSLK-TPPAPKTPSSGEPX-a4-b6          | TAU_HUMAN P10636-8 | TAU_HUMAN P10636-8 | xlink | intra-protein xl | 298     | 180     | 118     | 4288.26  | 1073.073 | 4 | -3.4           | 14.61    |
| VTSKCGSLGNIIHHPGGGQVEVK-KAKGADGK-a14-b1               | TAU_HUMAN P10636-8 | TAU_HUMAN P10636-8 | xlink | intra-protein xl | 331     | 141     | 190     | 3299.727 | 825.939  | 4 | -4.3           | 12.01    |
| IGSTENLKHQPGGGK-LDSLNVQSKCGSK-a8-b9                   | TAU_HUMAN P10636-8 | TAU_HUMAN P10636-8 | xlink | intra-protein xl | 267     | 290     | 23      | 3094.573 | 774.651  | 4 | 0.3            | 10.99    |
| HVPGGGSVQIVYKPVDSLK-VTSK-CGSLGNIIHHPGGGQVEVK-a19-b10  | TAU_HUMAN P10636-8 | TAU_HUMAN P10636-8 | xlink | intra-protein xl | 317     | 331     | 14      | 4505.388 | 751.906  | 6 | 0.5            | 10.52    |
| VQIINKKLDSLNVQSK-IGSTENLKHQPGGGK-a6-b8                | TAU_HUMAN P10636-8 | TAU_HUMAN P10636-8 | xlink | intra-protein xl | 280     | 267     | 13      | 3485.904 | 1162.976 | 3 | -4.9           | 10.29    |
| HVPGGGSVQIVYKPVDSLK-VTSK-SKIGSTENLK-a19-b2            | TAU_HUMAN P10636-8 | TAU_HUMAN P10636-8 | xlink | intra-protein xl | 317     | 259     | 58      | 3607.99  | 903.005  | 4 | 1.9            | 9.73     |
| SKDGTGSDDK-EPKAVAVR-a2-b4                             | TAU_HUMAN P10636-8 | TAU_HUMAN P10636-8 | xlink | intra-protein xl | 132     | 225     | 93      | 2171.15  | 724.724  | 3 | 3              | 9.46     |
| IGSTENLKHQPGGGK-SEKLDK-a8-b3                          | TAU_HUMAN P10636-8 | TAU_HUMAN P10636-8 | xlink | intra-protein xl | 267     | 343     | 76      | 2525.302 | 632.333  | 4 | -4             | 9.22     |
| IETHKLTRENAX-TPPKSPSSAX-a5-b4                         | TAU_HUMAN P10636-8 | TAU_HUMAN P10636-8 | xlink | intra-protein xl | 375     | 234     | 141     | 2950.552 | 591.118  | 5 | 0.1            | 8.95     |
| IETHKLTFR-MVYSK-a5-b4                                 | TAU_HUMAN P10636-8 | TAU_HUMAN P10636-8 | xlink | intra-protein xl | 375     | 130     | 245     | 1960.09  | 654.371  | 3 | 4.3            | 8.94     |
| IPAKTPAPKTPSSGEPX-LDFKDRVQSK-a10-b4                   | TAU_HUMAN P10636-8 | TAU_HUMAN P10636-8 | xlink | intra-protein xl | 180     | 347     | 167     | 3482.866 | 871.724  | 4 | -3.3           | 8.37     |
| AKGADGKTK-CGSKDNIIK-a7-b4                             | TAU_HUMAN P10636-8 | TAU_HUMAN P10636-8 | xlink | intra-protein xl | 148     | 294     | 146     | 1932.999 | 645.341  | 3 | 2.6            | 8.06     |

## Pulse Sonication XL-MS Data

| Id                                  | Protein1           | Protein2           | Type  | XLType           | AbsPos1 | AbsPos2 | deltaAA | Mr       | Mz      | z | Error_rel[ppm] | ld-Score |
|-------------------------------------|--------------------|--------------------|-------|------------------|---------|---------|---------|----------|---------|---|----------------|----------|
| IGSTENLKHQPGGGK-KLDLSNVQSK-a8-b1    | TAU_HUMAN P10636-8 | TAU_HUMAN P10636-8 | xlink | intra-protein xl | 267     | 281     | 14      | 2790.491 | 698.631 | 4 | 1.3            | 33.22    |
| HQPGGGKVQIINK-SKIGSTENLK-a7-b2      | TAU_HUMAN P10636-8 | TAU_HUMAN P10636-8 | xlink | intra-protein xl | 274     | 259     | 15      | 2588.429 | 648.115 | 4 | 0.3            | 29.67    |
| IGSTENLKHQPGGGK-VQIINKK-a8-b6       | TAU_HUMAN P10636-8 | TAU_HUMAN P10636-8 | xlink | intra-protein xl | 267     | 280     | 13      | 2501.4   | 626.358 | 4 | 1.4            | 28.05    |
| IGSLDNITHVPGGGNKK-SEKLDLFKDR-a16-b3 | TAU_HUMAN P10636-8 | TAU_HUMAN P10636-8 | xlink | intra-protein xl | 369     | 343     | 26      | 2980.565 | 746.149 | 4 | 1.1            | 19.72    |
| GADGKTK-MVSKSX-a5-b4                | TAU_HUMAN P10636-8 | TAU_HUMAN P10636-8 | xlink | intra-protein xl | 148     | 130     | 18      | 1605.846 | 536.29  | 3 | 4              | 12.83    |
| KIETHXLTR-TPPKSPSSAX-a1-b4          | TAU_HUMAN P10636-8 | TAU_HUMAN P10636-8 | xlink | intra-protein xl | 370     | 234     | 136     | 2636.423 | 879.816 | 3 | -2             | 7.52     |
| AKTDHGAEIVYK-MVSKSK-a2-b4           | TAU_HUMAN P10636-8 | TAU_HUMAN P10636-8 | xlink | intra-protein xl | 385     | 130     | 255     | 2147.123 | 716.716 | 3 | -3.1           | 6.87     |
| SKDGTGSDDK-EPKKVAVVR-a2-b3          | TAU_HUMAN P10636-8 | TAU_HUMAN P10636-8 | xlink | intra-protein xl | 132     | 224     | 92      | 2171.151 | 724.725 | 3 | 3.5            | 6.7      |
| AKTDHGAEIVYK-GADGKXIATPR-a2-b5      | TAU_HUMAN P10636-8 | TAU_HUMAN P10636-8 | xlink | intra-protein xl | 385     | 148     | 237     | 2796.48  | 933.168 | 3 | 1.2            | 6.05     |
| SKIGSTENLX-TKIATPR-a2-b2            | TAU_HUMAN P10636-8 | TAU_HUMAN P10636-8 | xlink | intra-protein xl | 259     | 150     | 109     | 2113.167 | 705.397 | 3 | -3.4           | 5.95     |
| KLDLSNVQSXCXGSK-AKGADGXTK-a1-b2     | TAU_HUMAN P10636-8 | TAU_HUMAN P10636-8 | xlink | intra-protein xl | 281     | 143     | 138     | 2803.453 | 935.492 | 3 | 1              | 5.93     |

## Mechanical Homogenization and Pulse Sonication XL-MS Data

| Id                                 | Protein1           | Protein2           | Type  | XLType           | AbsPos1 | AbsPos2 | deltaAA | Mr       | Mz      | z | Error_rel[ppm] | ld-Score |
|------------------------------------|--------------------|--------------------|-------|------------------|---------|---------|---------|----------|---------|---|----------------|----------|
| CGSKDNIK-ENAKAX-a4-b4              | TAU_HUMAN P10636-8 | TAU_HUMAN P10636-8 | xlink | intra-protein xl | 294     | 383     | 89      | 1831.91  | 458.985 | 4 | -0.1           | 15.8     |
| KLDLSNVQSKCGSK-KVAVVR-a10-b1       | TAU_HUMAN P10636-8 | TAU_HUMAN P10636-8 | xlink | intra-protein xl | 290     | 225     | 65      | 2371.325 | 593.839 | 4 | -0.2           | 15.51    |
| TPPSSGEPKSGDR-IPAKTPPAPK-a10-b4    | TAU_HUMAN P10636-8 | TAU_HUMAN P10636-8 | xlink | intra-protein xl | 190     | 174     | 16      | 2567.36  | 642.848 | 4 | 0.1            | 14.08    |
| SRLQTAPVMPDLKNVX-SKDGTSDDKK-a14-b2 | TAU_HUMAN P10636-8 | TAU_HUMAN P10636-8 | xlink | intra-protein xl | 254     | 132     | 122     | 3281.677 | 657.343 | 5 | -4.6           | 13.49    |
| DGTGSDDKX-KIETHX-a8-b1             | TAU_HUMAN P10636-8 | TAU_HUMAN P10636-8 | xlink | intra-protein xl | 140     | 370     | 230     | 2041.988 | 681.67  | 3 | -2             | 10.3     |
| KLDLSNVQSK-TKIATPR-a1-b2           | TAU_HUMAN P10636-8 | TAU_HUMAN P10636-8 | xlink | intra-protein xl | 281     | 150     | 131     | 2054.177 | 685.734 | 3 | 1.9            | 9.84     |
| SEKLDLFX-VQIINKX-a3-b6             | TAU_HUMAN P10636-8 | TAU_HUMAN P10636-8 | xlink | intra-protein xl | 343     | 280     | 63      | 2073.148 | 692.057 | 3 | 0.3            | 9.57     |
| SKDGTGSDDK-LDFKDR-a2-b4            | TAU_HUMAN P10636-8 | TAU_HUMAN P10636-8 | xlink | intra-protein xl | 132     | 347     | 215     | 1938.919 | 647.314 | 3 | 1.2            | 9.01     |
